# Supplementary material
Source: publisher site journal article supplement (https://www.dovepress.com/article/supplementary_file/534380/534380%20Revised%20Supplementary%20Tables.xlsx)
Supplement: Supplementary file 1 [file 534380%20Revised%20Supplementary%20Tables.xlsx]

## Sheet: Supplementary Table 01
Table S1. Pleiotropic loci between neck pain and OSA identified from cross-trait meta-analysis (P-CPASSOC < 5×10-8, single trait P-value < 1×10-3).
SNP	Test.shet	P.shet	CHR.x	BP.x	A1.x	A2.x	Beta.x	Se.x	P.x	N.x	Z.x	CHR.y	BP.y	A1.y	A2.y	Beta.y	Se.y	P.y	N.y	Z.y
CPASSOC			Trait1:Neck pain									Trait 2:OSA
rs10048235	35.4087	3.64393e-09	18	31254013	A	G	0.00436847	0.000876658	6.29999e-07	461857	4.98309	18	33674049	A	G	0.0264085	0.00778067	0.000688494	375657	3.39412
rs10163715	38.7172	5.82355e-10	18	31185696	A	G	-0.00421262	0.000890744	2.30001e-06	461857	-4.72933	18	33605732	A	G	-0.0345087	0.0083231	3.38135e-05	375657	-4.14614
rs1032081	30.8468	4.56159e-08	18	31103394	T	A	0.00344687	0.000890151	0.000109999	461857	-3.87223	18	33523430	T	A	0.0310349	0.00785961	7.85905e-05	375657	3.94866
rs1032235	30.9868	4.22123e-08	11	103766971	C	T	0.00427005	0.0011629	0.000239999	461857	3.6719	11	103896243	C	T	0.0461981	0.0104936	1.07011e-05	375657	4.4025
rs10423928	37.804	9.66082e-10	19	46182304	A	T	-0.00366394	0.00110443	0.000909997	461857	-3.31749	19	45679046	A	T	-0.050987	0.00882387	7.54553e-09	375657	-5.7783
rs10760344	34.1008	7.52156e-09	9	127026282	T	G	0.00447227	0.000928704	1.5e-06	461857	4.8156	9	124264003	T	G	0.0276141	0.00806639	0.000618543	375657	3.42335
rs1079232	35.1613	4.1792e-09	13	53906017	A	G	0.00454563	0.000948594	1.7e-06	461857	4.79197	13	53331882	A	G	0.0285543	0.00793692	0.000321107	375657	3.59766
rs10818937	35.4333	3.59449e-09	9	127015440	T	C	0.00475874	0.000940157	4.20001e-07	461857	5.06164	9	124253161	T	C	0.0268831	0.00814631	0.000966741	375657	3.30003
rs10818940	37.0172	1.49427e-09	9	127063459	T	C	0.00464765	0.000928544	5.60003e-07	461857	5.00531	9	124301180	T	C	0.0291336	0.00813422	0.000341484	375657	3.58161
rs10818943	35.0628	4.41382e-09	9	127087740	T	C	0.00432792	0.000925957	2.99999e-06	461857	4.674	9	124325461	T	C	0.0301266	0.00807559	0.000191043	375657	3.73058
rs10850379	31.9215	2.51547e-08	12	110002777	T	C	0.00389862	0.000883583	1e-05	461857	4.41228	12	109564972	T	C	0.0283169	0.00782589	0.000296469	375657	3.61836
rs10986291	34.6961	5.40832e-09	9	127016271	T	A	0.00460062	0.00092732	7.00003e-07	461857	4.9612	9	124253992	T	A	0.0267641	0.00805071	0.000885972	375657	3.32444
rs10986292	33.4777	1.06222e-08	9	127016876	G	T	0.0044253	0.000925605	1.7e-06	461857	4.78098	9	124254597	G	T	0.0272071	0.00804928	0.00072467	375657	3.38007
rs11081819	35.5371	3.39369e-09	18	31253072	G	A	0.0043797	0.000876431	5.80003e-07	461857	4.9972	18	33673108	G	A	0.0264073	0.00778066	0.00068889	375657	3.39397
rs11081820	35.7442	3.02571e-09	18	31259155	T	A	0.00439379	0.000876994	5.39995e-07	461857	5.01006	18	33679191	T	A	0.0265016	0.00778102	0.000659402	375657	3.40593
rs111623477	35.5585	3.35369e-09	1	39811205	T	C	0.00570463	0.00117894	1.29999e-06	461857	4.83878	1	39345533	T	C	0.0365714	0.0101776	0.000326498	375657	3.59332
rs11661192	39.2725	4.28052e-10	18	31203623	T	C	-0.00431648	0.00088892	1.2e-06	461857	-4.85587	18	33623659	T	C	-0.0337764	0.0083178	4.8917e-05	375657	-4.06074
rs1222763	31.7488	2.76797e-08	1	97049974	A	G	0.00320302	0.00088823	0.000309999	461857	-3.60607	1	96584418	A	G	-0.0353514	0.00769581	4.35692e-06	375657	-4.59359
rs12314392	31.3588	3.43534e-08	12	110010866	G	A	0.00381078	0.000881038	1.5e-05	461857	4.32533	12	109573061	G	A	0.0284255	0.00779694	0.000266637	375657	3.64573
rs12827710	34.4794	6.09818e-09	12	74844696	T	C	-0.00725302	0.00150448	1.40001e-06	461857	-4.82095	12	74450916	T	C	-0.037811	0.0109005	0.000522914	375657	-3.46874
rs12953422	39.666	3.44141e-10	18	31192529	G	A	-0.00436095	0.000889097	9.29994e-07	461857	-4.90492	18	33612565	G	A	-0.0336886	0.00831755	5.11517e-05	375657	-4.0503
rs12957987	41.8569	1.02137e-10	18	31212209	A	G	-0.00447703	0.000878026	3.40001e-07	461857	-5.09897	18	33632245	A	G	-0.0328177	0.00803228	4.3939e-05	375657	-4.08573
rs12961461	31.3364	3.47813e-08	18	31206349	A	G	0.00363351	0.000880378	3.69999e-05	461857	-4.12722	18	33626385	A	G	0.0287769	0.00776432	0.000210305	375657	3.7063
rs12961600	31.5593	3.07422e-08	18	31206380	C	A	0.00366622	0.000880491	3.09999e-05	461857	-4.16384	18	33626416	C	A	0.0286695	0.00776389	0.000221917	375657	3.69267
rs12961905	31.4999	3.17706e-08	18	31206621	A	T	0.00366098	0.000880615	3.2e-05	461857	-4.1573	18	33626657	A	T	0.0286673	0.0077639	0.000222162	375657	3.69238
rs12962308	31.4923	3.19052e-08	18	31206166	T	C	0.00366792	0.000880494	3.09999e-05	461857	-4.16575	18	33626202	T	C	0.0285797	0.00776408	0.000232306	375657	3.68102
rs13056300	37.5796	1.09407e-09	22	41408754	C	T	0.00408119	0.000989894	3.69999e-05	461857	4.12286	22	41012750	C	T	0.0393244	0.00827865	2.03315e-06	375657	4.7501
rs13217502	35.2152	4.0563e-09	6	163231414	T	C	-0.00607645	0.00124771	1.09999e-06	461857	-4.87008	6	162810382	T	C	-0.0515032	0.0146813	0.000451336	375657	-3.50808
rs1324673	31.7811	2.7189e-08	6	23712630	T	A	0.0034716	0.000976015	0.000379997	461857	-3.55691	6	23712402	T	A	0.0418525	0.00937675	8.06585e-06	375657	4.46343
rs1325020	31.8709	2.58698e-08	6	23716485	A	G	0.00343555	0.00097409	0.000420001	461857	-3.52693	6	23716257	A	G	0.0423038	0.00937499	6.40944e-06	375657	4.51241
rs1325021	32.1218	2.25132e-08	6	23713874	A	G	0.00347112	0.000975996	0.000379997	461857	-3.55649	6	23713646	A	G	0.0422962	0.00937625	6.45253e-06	375657	4.51099
rs1373272	35.1415	4.22538e-09	13	53959344	C	T	0.00419359	0.00096369	1.40001e-05	461857	4.3516	13	53385209	C	T	0.0341057	0.0082359	3.45653e-05	375657	4.1411
rs1384876	31.4287	3.30484e-08	18	31203929	T	C	0.00366384	0.000880762	3.2e-05	461857	-4.15985	18	33623965	T	C	0.0285668	0.00776406	0.000233814	375657	3.67936
rs1389066	35.3175	3.83271e-09	18	31262834	G	A	0.004322	0.000878139	8.60003e-07	461857	4.92177	18	33682870	G	A	0.0269156	0.00778394	0.00054454	375657	3.45784
rs1443906	36.1511	2.41479e-09	13	53960886	T	G	0.00425945	0.000961117	9.29994e-06	461857	4.43177	13	53386751	T	G	0.0344275	0.00824075	2.94449e-05	375657	4.17771
rs1443920	35.0562	4.42986e-09	13	53939226	A	G	0.00417918	0.000962975	1.40001e-05	461857	4.33986	13	53365091	A	G	0.0341261	0.00823492	3.41201e-05	375657	4.14407
rs1539830	35.1117	4.29584e-09	18	31258199	A	T	0.00433711	0.000876925	7.59994e-07	461857	4.94582	18	33678235	A	T	0.026455	0.00778063	0.000673597	375657	3.40011
rs1555758	31.3683	3.41727e-08	6	23708523	G	T	0.00345503	0.000975968	0.0004	461857	-3.54011	6	23708295	G	T	0.0415366	0.00938343	9.57326e-06	375657	4.42659
rs1558804	31.7833	2.71557e-08	12	109898732	G	A	0.00382417	0.000880945	1.40001e-05	461857	4.34099	12	109460927	G	A	0.0287515	0.00779789	0.000226835	375657	3.68709
rs16826012	37.4709	1.162e-09	1	39719519	C	T	0.00600544	0.00118267	3.79997e-07	461857	5.07787	1	39253847	C	T	0.0361398	0.0101761	0.000383116	375657	3.55144
rs16826068	35.6296	3.22397e-09	1	39791876	C	G	0.00586754	0.00118314	7.10003e-07	461857	4.95929	1	39326204	C	G	0.0351431	0.0101762	0.000553427	375657	3.45346
rs16837533	37.7485	9.96263e-10	1	39703847	A	G	0.00596628	0.0011833	4.60002e-07	461857	5.04207	1	39238175	A	G	0.0369778	0.0101804	0.000280938	375657	3.63225
rs16980973	38.9655	5.07461e-10	20	19648493	T	A	-0.00692631	0.00131989	1.5e-07	461857	-5.24764	20	19667849	T	A	-0.036622	0.0103587	0.000407211	375657	-3.53539
rs170084	33.9326	8.25604e-09	16	72178483	A	T	-0.00568207	0.00124171	4.70002e-06	461857	-4.576	16	72144584	A	T	-0.0398806	0.0107864	0.000217886	375657	-3.6973
rs17491275	37.6771	1.03652e-09	1	39672545	G	T	0.00615016	0.00120563	3.40001e-07	461857	5.1012	1	39206873	G	T	0.036137	0.0101807	0.000385878	375657	3.54956
rs1800437	37.6076	1.07723e-09	19	46181392	C	G	-0.00367392	0.00110445	0.000879995	461857	-3.32647	19	45678134	C	G	-0.0507023	0.00883095	9.38772e-09	375657	-5.74143
rs1867368	35.2097	4.06872e-09	13	53903511	C	T	0.00456317	0.000948905	1.5e-06	461857	4.80888	13	53329376	C	T	0.0284391	0.00793671	0.000339367	375657	3.58324
rs1941692	35.4414	3.57846e-09	18	31269604	G	A	0.00433171	0.000878491	8.19993e-07	461857	4.93085	18	33689640	G	A	0.0269547	0.00778289	0.000533544	375657	3.46333
rs1941693	35.4244	3.61231e-09	18	31267337	G	A	0.00433362	0.000878445	8.09991e-07	461857	4.93329	18	33687373	G	A	0.0269175	0.00778409	0.000544177	375657	3.45802
rs1941694	35.6314	3.22074e-09	18	31264712	A	C	0.0043675	0.000878185	6.59994e-07	461857	4.97333	18	33684748	A	C	0.0267466	0.00778354	0.000589698	375657	3.4363
rs1941695	35.4056	3.65012e-09	18	31252605	T	C	0.00436991	0.000876423	6.19998e-07	461857	4.98607	18	33672641	T	C	0.0263806	0.00778187	0.000698892	375657	3.39001
rs1941696	35.4631	3.53562e-09	18	31252129	A	G	0.00437367	0.000876353	5.99998e-07	461857	4.99076	18	33672165	A	G	0.0263919	0.00778071	0.000693937	375657	3.39197
rs1978969	35.0643	4.41007e-09	13	53896317	A	C	0.0045523	0.000951675	1.7e-06	461857	4.78346	13	53322182	A	C	0.0285455	0.00794027	0.000324355	375657	3.59503
rs1981359	35.7344	3.0421e-09	18	31266448	C	A	0.00435624	0.000878298	7.10003e-07	461857	4.95987	18	33686484	C	A	0.0269835	0.00778326	0.000526563	375657	3.46686
rs2026190	33.4541	1.07624e-08	9	127023263	A	G	0.00441649	0.000928955	2e-06	461857	4.75426	9	124260984	A	G	0.0275099	0.00806761	0.000649815	375657	3.40992
rs2068165	34.6171	5.65026e-09	9	127088350	A	G	0.00429423	0.000925987	3.50002e-06	461857	4.63746	9	124326071	A	G	0.0300041	0.00807617	0.000203095	375657	3.71514
rs217179	32.2193	2.13296e-08	16	72214974	T	C	-0.00569769	0.00130653	1.29999e-05	461857	-4.36093	16	72181075	T	C	-0.0394539	0.0105935	0.000195821	375657	-3.72435
rs217180	39.1383	4.61104e-10	16	72184629	T	C	-0.00719021	0.00147336	1.09999e-06	461857	-4.88014	16	72150730	T	C	-0.0456347	0.0113706	5.98522e-05	375657	-4.01339
rs2181938	32.2201	2.132e-08	6	23716153	C	T	0.00343526	0.00097409	0.000420001	461857	-3.52664	6	23715925	C	T	0.0427587	0.00937501	5.09296e-06	375657	4.56092
rs2238691	37.6618	1.04533e-09	19	46179043	A	G	-0.00368021	0.00110521	0.000870001	461857	-3.32987	19	45675785	A	G	-0.0507044	0.00882687	9.2289e-09	375657	-5.74432
rs2274782	34.9723	4.64073e-09	9	127084074	T	C	0.0041754	0.000912015	4.70002e-06	461857	4.57821	9	124321795	T	C	0.0305014	0.00794915	0.000124515	375657	3.83706
rs2282084	32.8696	1.48777e-08	9	127021532	C	G	0.00426749	0.000917663	3.29997e-06	461857	4.65039	9	124259253	C	G	0.027599	0.00798333	0.000546072	375657	3.45708
rs2282085	32.6699	1.6618e-08	9	127025040	G	A	0.00424927	0.000917524	3.59998e-06	461857	4.63124	9	124262761	G	A	0.0275599	0.00798197	0.000554856	375657	3.45277
rs2424245	38.9859	5.01749e-10	20	19649716	T	C	-0.00693247	0.00131982	1.5e-07	461857	-5.25259	20	19669072	T	C	-0.0365776	0.0103564	0.000412629	375657	-3.53188
rs2424248	38.9779	5.03997e-10	20	19650324	A	G	-0.0069246	0.0013197	1.5e-07	461857	-5.2471	20	19669680	A	G	-0.0366281	0.0103538	0.000403673	375657	-3.53765
rs251032	34.5378	5.90411e-09	16	72077598	C	G	-0.00575854	0.00124167	3.50002e-06	461857	-4.63774	16	72043699	C	G	-0.039983	0.0107947	0.000212256	375657	-3.70395
rs30432	34.1245	7.42318e-09	16	72147186	T	C	-0.00569984	0.00124101	4.39997e-06	461857	-4.5929	16	72113287	T	C	-0.0399989	0.0108023	0.000213236	375657	-3.70281
rs34011920	33.4751	1.06378e-08	9	127027412	T	C	0.00440684	0.000928961	2.1e-06	461857	4.74384	9	124265133	T	C	0.0276667	0.00807607	0.00061307	375657	3.42576
rs34071757	34.3139	6.68372e-09	9	127017337	A	G	0.00452669	0.000925726	1e-06	461857	4.88988	9	124255058	A	G	0.0270501	0.0080493	0.000777857	375657	3.36055
rs34249777	33.9928	7.9852e-09	12	74846986	T	C	-0.00715925	0.00150334	1.89998e-06	461857	-4.76223	12	74453206	T	C	-0.0378818	0.0109023	0.000511493	375657	-3.47466
rs34603926	37.0824	1.44124e-09	6	163266793	T	A	-0.00619099	0.00124275	6.29999e-07	461857	-4.98169	6	162845761	T	A	-0.0546396	0.0150958	0.000295141	375657	-3.61952
rs34720542	32.4916	1.83428e-08	9	127027750	A	G	0.00424829	0.000917544	3.69999e-06	461857	4.63007	9	124265471	A	G	0.0273799	0.00798459	0.00060562	375657	3.42909
rs35672319	36.311	2.21003e-09	6	163245464	A	C	-0.00608859	0.00124782	1.09999e-06	461857	-4.87938	6	162824432	A	C	-0.054095	0.0148451	0.000268479	375657	-3.64396
rs35738516	31.9048	2.53883e-08	18	31195424	G	A	0.00368634	0.000880912	2.90001e-05	461857	-4.18469	18	33615460	G	A	0.0288463	0.00776457	0.000203109	375657	3.71512
rs36069443	36.3259	2.19192e-09	6	163248701	C	T	-0.0061059	0.00124633	9.59997e-07	461857	-4.8991	6	162827669	C	T	-0.0546772	0.015098	0.0002929	375657	-3.62149
rs3742015	31.3352	3.48056e-08	12	110017125	C	T	0.00381523	0.000881092	1.5e-05	461857	4.33012	12	109579320	C	T	0.0283531	0.00779703	0.000276478	375657	3.6364
rs3780204	35.9986	2.62773e-09	9	127092887	C	G	0.00428766	0.000925201	3.59998e-06	461857	-4.6343	9	124330608	C	G	0.030014	0.00807795	0.000202764	375657	3.71555
rs4788565	31.9647	2.4559e-08	16	71892471	A	G	-0.00784571	0.00177771	1e-05	461857	-4.41338	16	71858568	A	G	-0.0438812	0.0121113	0.000291018	375657	-3.62316
rs4799352	35.0922	4.34242e-09	18	31255656	G	T	0.00433658	0.000877007	7.59994e-07	461857	4.94475	18	33675692	G	T	0.0264449	0.00778068	0.000676846	375657	3.39879
rs4799704	31.8155	2.66748e-08	18	31191806	G	A	0.00367562	0.000880948	2.99999e-05	461857	-4.17235	18	33611842	G	A	0.0288657	0.00776414	0.000200942	375657	3.71782
rs4820423	30.684	4.99196e-08	22	41430338	T	A	0.0035065	0.000968434	0.000290001	461857	3.62079	22	41034334	T	A	0.0362083	0.0081882	9.7789e-06	375657	4.42201
rs4820426	30.7478	4.81869e-08	22	41432099	T	C	0.00350509	0.00096844	0.000299999	461857	3.61932	22	41036095	T	C	0.0363021	0.00818887	9.28881e-06	375657	4.4331
rs4821982	30.7466	4.82176e-08	22	41432104	T	C	0.00350496	0.00096844	0.000299999	461857	3.61918	22	41036100	T	C	0.0363021	0.00818887	9.28902e-06	375657	4.4331
rs4821999	30.8535	4.54467e-08	22	41470001	G	A	0.00403001	0.000904074	8.30004e-06	461857	4.45761	22	41073997	G	A	0.0265334	0.00778382	0.000652529	375657	3.40879
rs4836973	36.0203	2.59637e-09	9	127091587	G	A	0.00428447	0.000925081	3.59998e-06	461857	-4.63145	9	124329308	G	A	0.0300807	0.00808222	0.000197783	375657	3.72184
rs55887408	31.5317	3.12168e-08	15	52073816	A	G	-0.00352524	0.00088347	6.59994e-05	461857	-3.99022	15	51781619	A	G	-0.0314792	0.00770393	4.38642e-05	375657	-4.08612
rs56404230	37.1304	1.40334e-09	6	163252863	T	C	-0.00618437	0.00124364	6.59994e-07	461857	-4.9728	6	162831831	T	C	-0.0549084	0.0150976	0.000275956	375657	-3.6369
rs6112505	38.984	5.02294e-10	20	19648772	T	A	-0.00692532	0.00131981	1.5e-07	461857	-5.24721	20	19668128	T	A	-0.0366529	0.0103589	0.000402736	375657	-3.5383
rs61779282	35.8675	2.82588e-09	1	39840304	G	C	0.00587744	0.00118307	6.80002e-07	461857	4.96796	1	39374632	G	C	0.0352861	0.0101551	0.000511376	375657	3.47472
rs6507051	41.8575	1.02102e-10	18	31208453	A	G	-0.00446761	0.000877757	3.59998e-07	461857	-5.0898	18	33628489	A	G	-0.032907	0.00803163	4.18225e-05	375657	-4.09718
rs6606725	31.6853	2.86697e-08	12	109905368	A	C	0.00381415	0.000881048	1.5e-05	461857	4.32911	12	109467563	A	C	0.0287562	0.00779759	0.000226173	375657	3.68783
rs66880209	37.8627	9.35169e-10	1	39719812	A	G	0.00601729	0.00118264	3.59998e-07	461857	5.08801	1	39254140	A	G	0.0365408	0.0101779	0.000330415	375657	3.59021
rs67712738	36.331	2.18565e-09	6	163245768	A	G	-0.00608463	0.00124727	1.09999e-06	461857	-4.87836	6	162824736	A	G	-0.0541535	0.0148451	0.000264387	375657	-3.6479
rs6928886	31.5343	3.11709e-08	6	23712063	G	A	0.00344234	0.000975514	0.000420001	461857	-3.52874	6	23711835	G	A	0.0418466	0.00937519	8.06139e-06	375657	4.46355
rs7182917	31.3162	3.51723e-08	15	52080803	C	T	-0.00350305	0.000883316	7.29995e-05	461857	-3.96579	15	51788606	C	T	-0.0314747	0.007704	4.39815e-05	375657	-4.0855
rs7227291	30.8355	4.59022e-08	18	31186985	C	G	0.0035589	0.000880989	5.39995e-05	461857	-4.03966	18	33607021	C	G	0.0290661	0.00776562	0.00018189	375657	3.74292
rs7232636	39.2577	4.31567e-10	18	31267411	A	G	-0.0046117	0.000879599	1.6e-07	461857	5.24296	18	33687447	A	G	-0.0264637	0.00781052	0.000703477	375657	-3.38821
rs7233908	35.6469	3.19332e-09	18	31267449	C	T	0.00433281	0.000878449	8.09991e-07	461857	4.93234	18	33687485	C	T	0.0271732	0.00778778	0.00048444	375657	3.48921
rs7234652	31.9827	2.43164e-08	18	31093423	T	C	0.00353096	0.0008872	6.90001e-05	461857	-3.97989	18	33513459	T	C	0.0312694	0.00786538	7.02085e-05	375657	3.97557
rs7237528	31.3298	3.49095e-08	18	31210132	G	A	0.00365898	0.000881415	3.29997e-05	461857	-4.15126	18	33630168	G	A	0.0285512	0.00776679	0.000236859	375657	3.67606
rs7240876	34.9305	4.74949e-09	18	31256702	A	G	0.0043211	0.000876775	8.30004e-07	461857	4.9284	18	33676738	A	G	0.0264309	0.00778048	0.000681083	375657	3.39708
rs7241287	36.0062	2.61668e-09	18	31265411	T	G	0.00438891	0.000878275	5.80003e-07	461857	4.99719	18	33685447	T	G	0.0269081	0.00778347	0.000546047	375657	3.45708
rs7244798	38.5256	6.47613e-10	18	31248628	G	A	0.00460788	0.000876962	1.5e-07	461857	5.25437	18	33668664	G	A	0.0270174	0.00778557	0.000520092	375657	3.47019
rs726145	38.9872	5.01402e-10	18	31187910	A	C	-0.00424347	0.0008907	1.89998e-06	461857	-4.7642	18	33607946	A	C	-0.0344273	0.00832032	3.50744e-05	375657	-4.13774
rs72637904	35.5982	3.28068e-09	1	39668682	T	C	0.00579152	0.00118524	1e-06	461857	4.88637	1	39203010	T	C	0.036044	0.0101829	0.000400645	375657	3.53966
rs72661956	34.8247	5.03634e-09	1	39784888	C	G	0.00577757	0.00118378	1.09999e-06	461857	4.88061	1	39319216	C	G	0.0349449	0.0101527	0.00057759	375657	3.44193
rs7290458	30.9555	4.295e-08	22	41476337	C	T	0.00402696	0.00090307	8.19993e-06	461857	4.45919	22	41080333	C	T	0.0266348	0.00778432	0.000622544	375657	3.4216
rs729295	31.3491	3.45388e-08	6	23710920	G	A	0.0034745	0.000975978	0.000369999	461857	-3.56002	6	23710692	G	A	0.0412903	0.00938495	1.08435e-05	375657	4.39963
rs729297	30.9561	4.29355e-08	6	23711545	T	C	0.00343377	0.000977172	0.000439997	461857	-3.51399	6	23711317	T	C	0.0413013	0.00938494	1.0785e-05	375657	4.40081
rs73017702	37.1652	1.37656e-09	6	163257695	A	C	-0.00620943	0.00124343	5.89997e-07	461857	-4.99379	6	162836663	A	C	-0.0545781	0.0150958	0.00029982	375657	-3.61545
rs7313797	31.8088	2.6774e-08	12	109896165	C	T	0.0038225	0.000880922	1.40001e-05	461857	4.3392	12	109458360	C	T	0.0287958	0.00779752	0.000221672	375657	3.69294
rs73201847	35.3185	3.83061e-09	13	53929134	T	C	0.00420076	0.000962688	1.29999e-05	461857	4.36357	13	53354999	T	C	0.034179	0.00823543	3.32124e-05	375657	4.15024
rs73209865	31.6624	2.90362e-08	4	896163	T	C	0.00315027	0.000925688	0.000669993	461857	3.40317	4	902375	T	C	-0.0393401	0.00848863	3.57899e-06	375657	-4.63445
rs7328879	35.0124	4.53869e-09	13	53953693	T	G	0.00417641	0.000963463	1.5e-05	461857	4.33479	13	53379558	T	G	0.0341303	0.00823526	3.40683e-05	375657	4.14441
rs7337692	33.6564	9.6213e-09	13	53942657	T	C	0.00404452	0.000966277	2.80001e-05	461857	4.18567	13	53368522	T	C	0.0341188	0.00823497	3.42555e-05	375657	4.14316
rs7337696	33.6707	9.5451e-09	13	53942659	T	C	0.00404628	0.000966327	2.80001e-05	461857	4.18728	13	53368524	T	C	0.0341188	0.00823497	3.42555e-05	375657	4.14316
rs755787	34.9057	4.81518e-09	13	53952015	T	G	0.00417108	0.000963421	1.5e-05	461857	4.32945	13	53377880	T	G	0.0340691	0.00823618	3.52614e-05	375657	4.13652
rs7559338	31.3338	3.48323e-08	2	157409472	T	C	0.00426935	0.000987694	1.5e-05	461857	-4.32254	2	156552960	T	C	0.0292024	0.00842108	0.000524795	375657	3.46777
rs75723348	31.2729	3.60278e-08	22	41420679	G	T	0.0035719	0.000969987	0.000230001	461857	3.68242	22	41024675	G	T	0.0363042	0.00819379	9.39291e-06	375657	4.4307
rs7765647	31.378	3.39903e-08	6	23707072	A	G	0.00347865	0.000976031	0.000369999	461857	-3.56408	6	23706844	A	G	0.0413081	0.00939096	1.08898e-05	375657	4.39871
rs7856570	34.2157	7.05735e-09	9	127012883	T	C	0.00457611	0.000927771	8.09991e-07	461857	4.93237	9	124250604	T	C	0.026555	0.00806073	0.000986416	375657	3.29437
rs7992723	31.763	2.7463e-08	13	53946802	T	C	0.00384889	0.000922345	2.99999e-05	461857	4.17294	13	53372667	T	C	0.0311923	0.00801324	9.91791e-05	375657	3.8926
rs8084438	31.4785	3.21502e-08	18	31192827	T	C	0.0036661	0.000881056	3.2e-05	461857	-4.16103	18	33612863	T	C	0.028611	0.00776449	0.000228834	375657	3.68485
rs8084619	41.9536	9.68015e-11	18	31208660	A	T	-0.00447383	0.000877824	3.50002e-07	461857	-5.0965	18	33628696	A	T	-0.0329378	0.00803201	4.11699e-05	375657	-4.10082
rs8086460	36.0209	2.59558e-09	18	31270819	T	C	0.004344	0.000878607	7.59994e-07	461857	4.94419	18	33690855	T	C	0.0274372	0.0077841	0.000423838	375657	3.52477
rs8086676	35.2621	3.95221e-09	18	31263801	G	A	0.00433328	0.000878165	8e-07	461857	4.93447	18	33683837	G	A	0.0267288	0.00778225	0.000593444	375657	3.43459
rs8086965	38.7513	5.71435e-10	18	31184571	T	C	-0.00422197	0.000890758	2.1e-06	461857	-4.73975	18	33604607	T	C	-0.0344319	0.00832166	3.50913e-05	375657	-4.13762
rs8089672	35.2709	3.93306e-09	18	31255046	A	C	0.00434572	0.000876666	7.19996e-07	461857	4.9571	18	33675082	A	C	0.0265173	0.00778156	0.000655089	375657	3.40771
rs8094018	35.1881	4.11767e-09	18	31261740	T	A	0.00433511	0.000877699	7.79992e-07	461857	4.93918	18	33681776	T	A	0.0266167	0.00778558	0.000629158	375657	3.41872
rs8095330	30.9754	4.24799e-08	18	31177013	G	A	0.00356781	0.000881191	5.1e-05	461857	-4.04885	18	33597049	G	A	0.0291777	0.00777789	0.000175873	375657	3.75136
rs8141730	31.0083	4.17138e-08	22	41473061	G	A	0.00400973	0.000903698	9.09997e-06	461857	4.43702	22	41077057	G	A	0.0269172	0.00778695	0.000546814	375657	3.45671
rs8142276	30.7378	4.84528e-08	22	41471447	C	T	0.00402313	0.000903702	8.50002e-06	461857	4.45183	22	41075443	C	T	0.0264599	0.00778418	0.000675865	375657	3.39919
rs873573	33.4345	1.088e-08	13	53922199	C	T	0.00423226	0.000960866	1.09999e-05	461857	4.40463	13	53348064	C	T	0.0313688	0.00816728	0.000122639	375657	3.84079
rs873785	32.9323	1.43698e-08	4	925149	C	T	0.00310315	0.000899898	0.000560003	461857	3.44834	4	931361	C	T	-0.037957	0.00798458	1.99641e-06	375657	-4.75379
rs888194	31.5874	3.02671e-08	12	109986918	G	C	0.00384961	0.000881148	1.2e-05	461857	4.36886	12	109549113	G	C	0.0282625	0.00779756	0.000289488	375657	3.62453
rs912355	35.6018	3.27417e-09	9	127090966	T	C	0.00424058	0.000925169	4.60002e-06	461857	-4.58357	9	124328687	T	C	0.0301023	0.0080798	0.000194827	375657	3.72562
rs926914	31.2064	3.73776e-08	22	41418154	T	C	0.00356077	0.000968668	0.000239999	461857	3.67594	22	41022150	T	C	0.0363125	0.00819849	9.45954e-06	375657	4.42917
rs9358657	31.3003	3.54837e-08	6	23718184	G	A	0.00338087	0.000974681	0.000519996	461857	-3.46869	6	23717956	G	A	0.0422287	0.00937544	6.663e-06	375657	4.50418
rs944337	33.8709	8.5434e-09	9	127022266	T	G	0.00445065	0.000930375	1.7e-06	461857	4.78372	9	124259987	T	G	0.0276784	0.00806675	0.00060098	375657	3.43117
rs944338	33.8996	8.40824e-09	9	127022267	T	G	0.00445361	0.00093037	1.7e-06	461857	4.78692	9	124259988	T	G	0.0276784	0.00806675	0.00060098	375657	3.43117
rs9527064	33.6666	9.56686e-09	13	53897024	A	G	0.00440546	0.000950856	3.59998e-06	461857	4.63315	13	53322889	A	G	0.0284965	0.00793857	0.000331154	375657	3.58963
rs9527069	33.9979	7.96258e-09	13	53925551	G	A	0.0040665	0.000961907	2.39999e-05	461857	4.22754	13	53351416	G	A	0.0340755	0.00823382	3.49615e-05	375657	4.13848
rs9527070	35.4145	3.63222e-09	13	53926966	G	A	0.0042158	0.000962594	1.2e-05	461857	4.37962	13	53352831	G	A	0.0341214	0.00823529	3.42326e-05	375657	4.14331
rs9536386	31.1364	3.8856e-08	13	53879428	A	G	0.00397019	0.000944382	2.59998e-05	461857	4.20401	13	53305293	A	G	0.0306156	0.0081334	0.000167094	375657	3.76418
rs9536410	31.1053	3.95315e-08	13	53971828	C	T	0.00331885	0.000904301	0.000239999	461857	-3.67007	13	53397693	C	T	0.0334055	0.00789468	2.32247e-05	375657	4.23139
rs9568844	35.0204	4.51856e-09	13	53956469	A	C	0.00418053	0.0009636	1.40001e-05	461857	4.33845	13	53382334	A	C	0.0341029	0.0082355	3.4586e-05	375657	4.14096
rs9568846	33.7753	9.00804e-09	13	53958378	A	G	0.00404409	0.000963111	2.69998e-05	461857	4.19899	13	53384243	A	G	0.0341159	0.00823435	3.4261e-05	375657	4.14312
rs959391	31.4663	3.23679e-08	18	31205694	G	A	0.00363582	0.000880562	3.59998e-05	461857	-4.12898	18	33625730	G	A	0.0288995	0.00776401	0.000197465	375657	3.72224
rs9607765	32.3997	1.93006e-08	22	41415337	T	C	0.00372311	0.000972606	0.000129999	461857	3.82797	22	41019333	T	C	0.0361749	0.00820133	1.02965e-05	375657	4.41086
rs9611460	31.8364	2.6368e-08	22	41418297	C	T	0.00364353	0.000988705	0.000230001	461857	3.68515	22	41022293	C	T	0.0371307	0.00823659	6.5435e-06	375657	4.50802

## Sheet: Supplementary Table 02
Table S2.The candidate pleiotropic genes identified between MAGMA and ones annotated by CPASSOC
Symbol	Gene	CHR	Start	Stop	NSNPS	NPARAM	N	Z	P
AC011308.1	ENSG00000268857	2	157302597	157402655	160	15	1672565	3.0204	0.0012624
AC011475.1	ENSG00000226104	19	10701715	10802093	185	20	1672565	4.4634	4.0328e-06
ACSS2	ENSG00000131069	20	33409949	33565769	226	15	1672565	3.6041	0.00015664
AL035681.1	ENSG00000269104	22	41635388	41735686	144	14	1672565	4.5226	3.0547e-06
AP1G1	ENSG00000166747	16	71712913	71893104	337	19	1672565	1.8784	0.030163
APEH	ENSG00000164062	3	49661435	49771396	126	12	1672565	1.6456	0.049923
ASXL3	ENSG00000141431	18	31108579	31381156	586	30	1672565	2.6623	0.0038805
ATP5B	ENSG00000110955	12	56981959	57089798	150	18	1672565	3.3596	0.00039033
ATP5E	ENSG00000124172	20	57550522	57657437	198	23	1672565	1.8038	0.03563
ATXN1L	ENSG00000224470	16	71829894	71969171	249	21	1672565	2.5699	0.0050866
AUTS2	ENSG00000158321	7	69013905	70308054	2410	90	1672565	6.2083	2.6779e-10
BAZ2A	ENSG00000076108	12	56939380	57080600	193	29	1672565	3.3455	0.00041065
BMP6	ENSG00000153162	6	7677030	7931655	758	66	1672565	3.9543	3.8384e-05
BMP8A	ENSG00000183682	1	39907318	40041607	233	29	1672565	1.755	0.039627
BSN	ENSG00000164061	3	49541922	49758978	255	14	1672565	1.9816	0.023762
CACNB2	ENSG00000165995	10	18379606	18880798	1666	110	1672565	3.9747	3.5228e-05
CDHR4	ENSG00000187492	3	49778165	49887268	125	11	1672565	1.6519	0.049278
CHADL	ENSG00000100399	22	41575517	41686938	205	14	1672565	4.9371	3.9654e-07
DCAF5	ENSG00000139990	14	69467598	69669867	371	24	1672565	1.797	0.036167
DGKQ	ENSG00000145214	4	902675	1030683	314	39	1672565	4.441	4.4774e-06
DHX38	ENSG00000140829	16	72077461	72196811	297	19	1672565	2.0224	0.021569
DNM2	ENSG00000079805	19	10778755	10994164	378	31	1672565	3.9424	4.0336e-05
EP300	ENSG00000100393	22	41437790	41626081	309	16	1672565	5.1099	1.6113e-07
FAM212A	ENSG00000185614	3	49790687	49892463	118	11	1672565	1.758	0.039373
FTO	ENSG00000140718	16	53687875	54205853	1311	127	1672565	6.69	1.1162e-11
GABRB1	ENSG00000163288	4	46945740	47478461	1169	79	1672565	4.1114	1.9667e-05
GAK	ENSG00000178950	4	793064	976161	541	38	1672565	3.8573	5.7328e-05
GAPVD1	ENSG00000165219	9	127974073	128179486	314	18	1672565	5.447	2.5614e-08
GGT7	ENSG00000131067	20	33382523	33510663	184	13	1672565	2.4244	0.0076676
GIPR	ENSG00000010310	19	46121502	46236982	259	24	1672565	4.4702	3.9081e-06
GPD2	ENSG00000115159	2	157241802	157520247	512	30	1672565	3.1201	0.00090404
GPX1	ENSG00000233276	3	49344609	49446033	127	12	1672565	1.7905	0.036685
GSS	ENSG00000100983	20	33466236	33593620	205	14	1672565	3.8863	5.0889e-05
HSD17B6	ENSG00000025423	12	57095945	57231574	200	20	1672565	2.951	0.0015838
HSPA5	ENSG00000044574	9	127947132	128053609	151	15	1672565	3.5515	0.00019154
IDUA	ENSG00000127415	4	930785	1048316	299	40	1672565	4.6373	1.765e-06
IL18R1	ENSG00000115604	2	102877989	103065218	602	22	1672565	2.0231	0.021533
IL18RAP	ENSG00000115607	2	102985149	103119025	512	18	1672565	1.8671	0.030946
ILF3	ENSG00000129351	19	10714937	10853093	278	18	1672565	4.1304	1.8106e-05
IST1	ENSG00000182149	16	71829899	72012913	367	19	1672565	2.5579	0.0052646
KCTD10	ENSG00000110906	12	109836461	109965349	457	27	1672565	2.0463	0.020361
KIAA0754	ENSG00000255103	1	39826151	39932154	150	17	1672565	2.0189	0.02175
L3MBTL2	ENSG00000100395	22	41551209	41677275	221	15	1672565	4.9014	4.757e-07
LEO1	ENSG00000166477	15	52180222	52314003	189	10	1672565	3.0373	0.0011934
LYSMD2	ENSG00000140280	15	51965208	52093782	308	20	1672565	4.1082	1.9938e-05
MACF1	ENSG00000127603	1	39496988	40002849	863	33	1672565	1.9503	0.025572
MAPK6	ENSG00000069956	15	52194303	52408462	300	25	1672565	2.841	0.0022484
MMAB	ENSG00000139428	12	109941542	110061679	377	23	1672565	2.4363	0.0074193
MVK	ENSG00000110921	12	109961060	110085067	415	29	1672565	2.2244	0.013059
MYO1H	ENSG00000174527	12	109735708	109943328	665	28	1672565	1.758	0.039377
NACA	ENSG00000196531	12	57056212	57175412	137	15	1672565	2.9072	0.0018232
NCOA6	ENSG00000198646	20	33234722	33463452	284	13	1672565	2.1854	0.014431
NEK6	ENSG00000119408	9	126969885	127165586	434	34	1672565	2.9772	0.0014545
NRXN3	ENSG00000021645	14	78658734	80380762	3795	213	1672565	4.1643	1.5618e-05
PACRG	ENSG00000112530	6	163098164	163786524	1970	140	1672565	1.8562	0.031712
PARK2	ENSG00000185345	6	161718452	163198803	4854	242	1672565	2.4111	0.0079518
PMFBP1	ENSG00000118557	16	72096056	72260777	415	28	1672565	2.1731	0.014885
PRIM1	ENSG00000198056	12	57075380	57196157	150	16	1672565	2.7051	0.003414
PRUNE2	ENSG00000106772	9	79176292	79571003	1035	89	1672565	5.7288	5.0576e-09
PSMB7	ENSG00000136930	9	127065745	127227723	293	28	1672565	2.456	0.0070245
PTGES3	ENSG00000110958	12	57007127	57132159	175	18	1672565	3.2233	0.00063352
QPCTL	ENSG00000011478	19	46145741	46257247	229	28	1672565	4.3851	5.7957e-06
QTRT1	ENSG00000213339	19	10762106	10874113	227	20	1672565	3.0841	0.0010209
RANGAP1	ENSG00000100401	22	41591615	41732255	242	16	1672565	5.0194	2.5911e-07
RBX1	ENSG00000100387	22	41297351	41419313	135	20	1672565	2.6683	0.0038123
RHOA	ENSG00000067560	3	49346578	49500431	190	15	1672565	1.9214	0.027339
SCG3	ENSG00000104112	15	51923550	52063223	306	22	1672565	4.3743	6.0918e-06
SLC24A3	ENSG00000185052	20	19143290	19753581	1721	115	1672565	2.7989	0.0025641
SLC25A17	ENSG00000100372	22	41115634	41265403	269	18	1672565	1.6782	0.046652
SLC26A1	ENSG00000145217	4	922861	1037228	287	38	1672565	4.5522	2.6538e-06
SLC44A2	ENSG00000129353	19	10663133	10805235	324	26	1672565	3.7997	7.2422e-05
SLC9A4	ENSG00000180251	2	103039762	103200431	546	21	1672565	3.4197	0.00031347
SNRPD2	ENSG00000125743	19	46140712	46245827	228	28	1672565	4.3415	7.076e-06
TMEM108	ENSG00000144868	3	132707235	133166636	1353	60	1672565	1.7593	0.039264
TMEM175	ENSG00000127419	4	876175	1002444	329	31	1672565	4.2957	8.7072e-06
TMOD2	ENSG00000128872	15	51993758	52158565	398	15	1672565	3.4501	0.00028021
TMOD3	ENSG00000138594	15	52071825	52289492	419	12	1672565	3.4128	0.00032151
TRAIP	ENSG00000183763	3	49816034	49944007	139	15	1672565	1.6613	0.048322
TUBB1	ENSG00000101162	20	57544309	57651709	204	26	1672565	2.1507	0.015752
TXNL4B	ENSG00000140830	16	72028188	72178330	383	23	1672565	2.551	0.0053702
UBA7	ENSG00000182179	3	49792640	49901379	128	12	1672565	1.728	0.041991
UBE3B	ENSG00000151148	12	109865207	110024507	498	23	1672565	2.4706	0.0067436
XPNPEP3	ENSG00000196236	22	41203081	41413838	212	24	1672565	2.0867	0.018457
ZC3H7B	ENSG00000100403	22	41647526	41806151	231	16	1672565	4.3554	6.6403e-06
ZNF821	ENSG00000102984	16	71843583	71979239	246	19	1672565	2.5748	0.0050142

## Sheet: Supplementary Table 03
Table S3.The significant candidate pleiotropic genes identified between MAGMA and ones annotated by CPASSOC
FTO	ENSG00000140718	16	53687875	54205853	1311	127	1672565	6.69	1.1162e-11
AUTS2	ENSG00000158321	7	69013905	70308054	2410	90	1672565	6.2083	2.6779e-10
PRUNE2	ENSG00000106772	9	79176292	79571003	1035	89	1672565	5.7288	5.0576e-09
GAPVD1	ENSG00000165219	9	127974073	128179486	314	18	1672565	5.447	2.5614e-08
EP300	ENSG00000100393	22	41437790	41626081	309	16	1672565	5.1099	1.6113e-07
RANGAP1	ENSG00000100401	22	41591615	41732255	242	16	1672565	5.0194	2.5911e-07
CHADL	ENSG00000100399	22	41575517	41686938	205	14	1672565	4.9371	3.9654e-07
L3MBTL2	ENSG00000100395	22	41551209	41677275	221	15	1672565	4.9014	4.757e-07
IDUA	ENSG00000127415	4	930785	1048316	299	40	1672565	4.6373	1.765e-06
SLC26A1	ENSG00000145217	4	922861	1037228	287	38	1672565	4.5522	2.6538e-06
AL035681.1	ENSG00000269104	22	41635388	41735686	144	14	1672565	4.5226	3.0547e-06
GIPR	ENSG00000010310	19	46121502	46236982	259	24	1672565	4.4702	3.9081e-06
AC011475.1	ENSG00000226104	19	10701715	10802093	185	20	1672565	4.4634	4.0328e-06
DGKQ	ENSG00000145214	4	902675	1030683	314	39	1672565	4.441	4.4774e-06
QPCTL	ENSG00000011478	19	46145741	46257247	229	28	1672565	4.3851	5.7957e-06
SCG3	ENSG00000104112	15	51923550	52063223	306	22	1672565	4.3743	6.0918e-06
ZC3H7B	ENSG00000100403	22	41647526	41806151	231	16	1672565	4.3554	6.6403e-06
SNRPD2	ENSG00000125743	19	46140712	46245827	228	28	1672565	4.3415	7.076e-06
TMEM175	ENSG00000127419	4	876175	1002444	329	31	1672565	4.2957	8.7072e-06
NRXN3	ENSG00000021645	14	78658734	80380762	3795	213	1672565	4.1643	1.5618e-05
ILF3	ENSG00000129351	19	10714937	10853093	278	18	1672565	4.1304	1.8106e-05
GABRB1	ENSG00000163288	4	46945740	47478461	1169	79	1672565	4.1114	1.9667e-05
LYSMD2	ENSG00000140280	15	51965208	52093782	308	20	1672565	4.1082	1.9938e-05
CACNB2	ENSG00000165995	10	18379606	18880798	1666	110	1672565	3.9747	3.5228e-05
BMP6	ENSG00000153162	6	7677030	7931655	758	66	1672565	3.9543	3.8384e-05
DNM2	ENSG00000079805	19	10778755	10994164	378	31	1672565	3.9424	4.0336e-05
GSS	ENSG00000100983	20	33466236	33593620	205	14	1672565	3.8863	5.0889e-05
GAK	ENSG00000178950	4	793064	976161	541	38	1672565	3.8573	5.7328e-05
SLC44A2	ENSG00000129353	19	10663133	10805235	324	26	1672565	3.7997	7.2422e-05
ACSS2	ENSG00000131069	20	33409949	33565769	226	15	1672565	3.6041	0.00015664
HSPA5	ENSG00000044574	9	127947132	128053609	151	15	1672565	3.5515	0.00019154
TMOD2	ENSG00000128872	15	51993758	52158565	398	15	1672565	3.4501	0.00028021
SLC9A4	ENSG00000180251	2	103039762	103200431	546	21	1672565	3.4197	0.00031347
TMOD3	ENSG00000138594	15	52071825	52289492	419	12	1672565	3.4128	0.00032151
ATP5B	ENSG00000110955	12	56981959	57089798	150	18	1672565	3.3596	0.00039033
BAZ2A	ENSG00000076108	12	56939380	57080600	193	29	1672565	3.3455	0.00041065

## Sheet: Supplementary Table 04
Table S04.The result of tissue enrichments
Full_name	NGENES	BETA	BETA_STD	SE	P
Brain_Cortex	17362	0.035303	0.064414	0.0076807	2.1704e-06
Brain_Frontal_Cortex_BA9	17362	0.033082	0.060988	0.0073917	3.8434e-06
Brain_Anterior_cingulate_cortex_BA24	17362	0.0333	0.058851	0.0078014	9.9162e-06
Brain_Hypothalamus	17362	0.034542	0.059495	0.0087143	3.7091e-05
Brain_Amygdala	17362	0.033377	0.056892	0.008476	4.1339e-05
Brain_Caudate_basal_ganglia	17362	0.032945	0.056937	0.0084379	4.7485e-05
Brain_Cerebellum	17362	0.025182	0.050016	0.0067229	9.037e-05
Brain_Nucleus_accumbens_basal_ganglia	17362	0.029778	0.051694	0.0081456	0.00012878
Brain_Putamen_basal_ganglia	17362	0.030868	0.052552	0.0085141	0.00014477
Brain_Cerebellar_Hemisphere	17362	0.023239	0.046655	0.0065031	0.00017679
Brain_Hippocampus	17362	0.030619	0.051881	0.0086087	0.00018842
Pituitary	17362	0.029245	0.054562	0.0097378	0.0013381
Brain_Substantia_nigra	17362	0.024446	0.042106	0.0091996	0.0039438
Brain_Spinal_cord_cervical_c-1	17362	0.014846	0.026697	0.0091563	0.052482
Heart_Atrial_Appendage	17362	0.0076178	0.013683	0.010051	0.22426
Colon_Sigmoid	17362	0.0022698	0.0044432	0.013337	0.43243
Muscle_Skeletal	17362	0.00096897	0.0018334	0.0074757	0.44844
Testis	17362	-0.0013484	-0.0023293	0.0060047	0.58884
Esophagus_Gastroesophageal_Junction	17362	-0.0042678	-0.008406	0.013575	0.62338
Esophagus_Muscularis	17362	-0.0044403	-0.0087633	0.013142	0.63227
Heart_Left_Ventricle	17362	-0.004716	-0.0078756	0.0097747	0.68526
Whole_Blood	17362	-0.0049123	-0.0088796	0.0061192	0.78894
Adrenal_Gland	17362	-0.010208	-0.019715	0.010623	0.83169
Liver	17362	-0.0071145	-0.012816	0.0069009	0.84871
Nerve_Tibial	17362	-0.011486	-0.023133	0.010841	0.85532
Uterus	17362	-0.013199	-0.026905	0.011766	0.869
Pancreas	17362	-0.011048	-0.018486	0.0093183	0.88211
Prostate	17362	-0.016263	-0.030875	0.012895	0.89636
Adipose_Subcutaneous	17362	-0.016211	-0.032368	0.011433	0.92188
Colon_Transverse	17362	-0.017945	-0.033015	0.012449	0.92528
Artery_Tibial	17362	-0.015547	-0.032022	0.010742	0.92609
Spleen	17362	-0.012778	-0.025335	0.0079173	0.94672
Thyroid	17362	-0.017245	-0.034175	0.010515	0.94949
Small_Intestine_Terminal_Ileum	17362	-0.017867	-0.032876	0.010221	0.95977
Cervix_Ectocervix	17362	-0.022641	-0.0444	0.012925	0.96008
Ovary	17362	-0.018048	-0.036604	0.01026	0.96071
Cervix_Endocervix	17362	-0.022344	-0.044259	0.012491	0.96317
Artery_Coronary	17362	-0.022864	-0.045534	0.012647	0.96468
Adipose_Visceral_Omentum	17362	-0.022377	-0.043485	0.011705	0.97204
Fallopian_Tube	17362	-0.024803	-0.048147	0.012751	0.97412
Stomach	17362	-0.025951	-0.047177	0.013058	0.97655
Cells_Cultured_fibroblasts	17362	-0.014286	-0.030619	0.0070384	0.9788
Artery_Aorta	17362	-0.022738	-0.04642	0.010986	0.98075
Lung	17362	-0.021451	-0.041498	0.0098575	0.98522
Kidney_Cortex	17362	-0.021856	-0.038428	0.0096713	0.98808
Skin_Sun_Exposed_Lower_leg	17362	-0.019211	-0.037301	0.0084243	0.9887
Breast_Mammary_Tissue	17362	-0.031488	-0.060588	0.013355	0.9908
Skin_Not_Sun_Exposed_Suprapubic	17362	-0.020406	-0.039375	0.0084086	0.99238
Minor_Salivary_Gland	17362	-0.025657	-0.047776	0.010395	0.9932
Vagina	17362	-0.029843	-0.057103	0.011939	0.99378
Bladder	17362	-0.038028	-0.074164	0.013999	0.9967
Cells_EBV-transformed_lymphocytes	17362	-0.014582	-0.031823	0.0052696	0.99717
Kidney_Medulla	17362	-0.029288	-0.054193	0.0099607	0.99836
Esophagus_Mucosa	17362	-0.026883	-0.052	0.0083805	0.99933

## Sheet: Supplementary Table 05
Table S05.The significant results of TWAS analyses by FUSION
	ID	PANEL	CHR	Start	End	BEST.GWAS.ID.Np	BEST.GWAS.Z.NP	TWAS.Z.NP	TWAS.P.NP	TWAS.fdr.P.NP	BEST.GWAS.ID.OSA	BEST.GWAS.Z.OSA	TWAS.Z.OSA	TWAS.P.OSA	TWAS.fdr.P.OSA
1	AP1G1	GTExv8.EUR.Brain_Nucleus_accumbens_basal_ganglia	16	71809200	71809201	rs9929256	5.46	-4.88014	1.06e-06	4.78E-03	rs217180	-4.01	-4.01339	5.99e-05	2.80E-02
2	FOXN4	GTExv8.EUR.Adipose_Visceral_Omentum	12	109309219	109309220	rs11067376	4.625	-4.1378	3.51e-05	2.60E-02	rs7313797	3.69	-3.94742	7.9e-05	3.06E-02
3	GPD2	GTExv8.EUR.Artery_Tibial	2	156435289	156435290	rs7599290	4.56	-3.78	1.55E-04	4.58E-02	rs1037961	-3.99	-3.89497	9.82e-05	3.01E-02
4	GPD2	GTExv8.EUR.Esophagus_Muscularis	2	156435289	156435290	rs7599290	4.56	-4.12055	3.78e-05	2.18E-02	rs1037961	-3.99	-3.82701	0.00013	3.13E-02
5	GPD2	GTExv8.EUR.Whole_Blood	2	156435289	156435290	rs7599290	4.56	-4.2988	1.72e-05	1.47E-02	rs1037961	-3.99	-3.83682	0.000125	3.06E-02
6	MMAB	GTExv8.EUR.Colon_Transverse	12	109573873	109573874	rs11067376	4.625	-4.60159	4.19e-06	4.71E-03	rs7313797	3.69	-3.74736	0.000179	4.30E-02
7	MMAB	GTExv8.EUR.Nerve_Tibial	12	109573873	109573874	rs11067376	4.625	-4.7791	1.76e-06	3.11E-03	rs7313797	3.69	-3.71597	0.000202	4.43E-02
8	NCK1-AS1	GTExv8.EUR.Esophagus_Muscularis	3	136862053	136862054	rs13072691	-4.21	4.08948	4.32e-05	2.42E-02	rs13099657	4.57	5.34141	9.22e-08	4.29E-04
9	RP11-3B7.1	GTExv8.EUR.Brain_Anterior_cingulate_cortex_BA24	3	49260084	49260085	rs11130208	4.92	-4.76536	1.89e-06	5.22E-03	rs4955420	3.61	-4.75133	2.02e-06	1.14E-02
10	RP11-69E11.8	GTExv8.EUR.Breast_Mammary_Tissue	1	39570479	39570480	rs12037222	5.153	-3.88221	1.04E-04	4.06E-02	rs16837533	3.632	-3.96001	7.49e-05	2.97E-02

## Sheet: Supplementary Table 06
Table S06.The result of F value(exposure=neck pain,outcome= OSA)
	SNP	exposure	outcome	effect_allele.exposure	other_allele.exposure	R2_Scheme3	Fvalue_Scheme3
1	rs10135643	neck pain	OSA	C	A	5.90431e-05	27.2709
2	rs1018503	neck pain	OSA	G	T	4.76961e-05	22.0297
3	rs10789929	neck pain	OSA	T	C	6.03596e-05	27.8791
5	rs11171739	neck pain	OSA	C	T	4.57741e-05	21.142
6	rs112039693	neck pain	OSA	C	T	5.03115e-05	23.2378
7	rs112292112	neck pain	OSA	A	G	5.30926e-05	24.5224
9	rs11736161	neck pain	OSA	G	A	4.85391e-05	22.4191
11	rs12732083	neck pain	OSA	T	C	5.42599e-05	25.0616
12	rs1286231	neck pain	OSA	T	C	4.82672e-05	22.2935
13	rs13031851	neck pain	OSA	C	T	5.61578e-05	25.9382
14	rs13107325	neck pain	OSA	T	C	9.29469e-05	42.932
15	rs1338034	neck pain	OSA	G	A	4.80727e-05	22.2037
16	rs1399629	neck pain	OSA	G	A	5.59487e-05	25.8416
17	rs1476535	neck pain	OSA	C	T	6.5651e-05	30.3232
19	rs159963	neck pain	OSA	C	A	5.20053e-05	24.0202
21	rs1962104	neck pain	OSA	T	C	4.65362e-05	21.494
22	rs1963206	neck pain	OSA	G	A	5.53314e-05	25.5565
23	rs198230	neck pain	OSA	A	C	4.87648e-05	22.5234
24	rs2149814	neck pain	OSA	C	A	5.12478e-05	23.6703
25	rs2283076	neck pain	OSA	G	A	5.3028e-05	24.4925
26	rs2587363	neck pain	OSA	G	A	5.44059e-05	25.129
27	rs270833	neck pain	OSA	G	A	4.78286e-05	22.0909
28	rs274622	neck pain	OSA	C	T	4.6352e-05	21.4089
29	rs2898518	neck pain	OSA	A	G	4.53863e-05	20.9628
31	rs3132469	neck pain	OSA	A	G	4.68392e-05	21.634
32	rs34332831	neck pain	OSA	T	C	4.617e-05	21.3248
33	rs35919525	neck pain	OSA	G	T	4.77215e-05	22.0415
34	rs36042757	neck pain	OSA	C	A	6.2903e-05	29.0539
35	rs4141466	neck pain	OSA	C	T	4.88037e-05	22.5414
36	rs4518923	neck pain	OSA	G	A	5.6148e-05	25.9337
39	rs55886108	neck pain	OSA	T	C	4.61396e-05	21.3108
40	rs56069701	neck pain	OSA	T	C	4.79947e-05	22.1676
42	rs6041749	neck pain	OSA	C	T	5.17766e-05	23.9145
43	rs6062964	neck pain	OSA	T	C	5.62399e-05	25.9761
44	rs6119944	neck pain	OSA	G	A	5.6035e-05	25.8815
45	rs61779314	neck pain	OSA	T	C	6.49568e-05	30.0026
46	rs62056490	neck pain	OSA	C	A	7.0266e-05	32.455
47	rs62131354	neck pain	OSA	T	C	4.58331e-05	21.1692
48	rs6606710	neck pain	OSA	C	T	5.30703e-05	24.5121
49	rs6935368	neck pain	OSA	T	C	5.46388e-05	25.2366
51	rs7232237	neck pain	OSA	A	G	6.19664e-05	28.6212
52	rs7248205	neck pain	OSA	C	T	6.80271e-05	31.4208
53	rs72671456	neck pain	OSA	A	G	5.71479e-05	26.3955
55	rs7297794	neck pain	OSA	T	C	5.12387e-05	23.666
56	rs7317962	neck pain	OSA	G	T	6.03069e-05	27.8547
57	rs7739896	neck pain	OSA	A	G	4.91273e-05	22.6908
58	rs7814844	neck pain	OSA	T	C	4.50746e-05	20.8189
59	rs78169991	neck pain	OSA	G	A	6.18319e-05	28.5591
60	rs8054093	neck pain	OSA	A	C	5.07e-05	23.4173
61	rs9375610	neck pain	OSA	A	G	4.56367e-05	21.0785
62	rs9889282	neck pain	OSA	C	A	0.000103378	47.7507

## Sheet: Supplementary Table 07
Table S07.The result of mendelian randomization(exposure=OSA,outcome= neck pain)
	Outcome	Exposure	Method	Nsnp	b	se	pval	lo_ci	up_ci	or
1	Neck pain	OSA	MR Egger	81	-0.0051476	0.00565383	0.365348	-0.0162291	0.00593391	0.994866
2	Neck pain	OSA	Weighted median	81	-0.00584911	0.00422499	0.166234	-0.0141301	0.00243187	0.994168
3	Neck pain	OSA	Inverse variance weighted	81	-0.00225443	0.00290137	0.437144	-0.00794112	0.00343225	0.997748
4	Neck pain	OSA	Simple mode	81	-0.0081256	0.00860086	0.347635	-0.0249833	0.00873208	0.991907
5	Neck pain	OSA	Weighted mode	81	-0.00556963	0.00480029	0.249389	-0.0149782	0.00383893	0.994446

## Sheet: Supplementary Table 08
Table S08: GO Analysis of Genes Shared between neck pain and OSA
	ID	Description	GeneRatio	BgRatio	pvalue	p.adjust	qvalue	geneID	Count
GO:0031333	GO:0031333	negative regulation of protein-containing complex assembly	4/32	147/18870	0.000107280960252648	0.0504013264164675	0.0361952352143908	EP300/HSPA5/TMOD2/TMOD3	4
GO:0048488	GO:0048488	synaptic vesicle endocytosis	3/32	71/18870	0.000234108092134125	0.0504013264164675	0.0361952352143908	DGKQ/DNM2/GAK	3
GO:0140238	GO:0140238	presynaptic endocytosis	3/32	72/18870	0.000244005772114746	0.0504013264164675	0.0361952352143908	DGKQ/DNM2/GAK	3
GO:0034309	GO:0034309	primary alcohol biosynthetic process	2/32	14/18870	0.000250327162835443	0.0504013264164675	0.0361952352143908	DGKQ/BMP6	2
GO:0090030	GO:0090030	regulation of steroid hormone biosynthetic process	2/32	15/18870	0.000288533208251248	0.0504013264164675	0.0361952352143908	DGKQ/BMP6	2
GO:0031062	GO:0031062	positive regulation of histone methylation	2/32	16/18870	0.0003294031255687	0.0504013264164675	0.0361952352143908	AUTS2/BAZ2A	2
GO:0036465	GO:0036465	synaptic vesicle recycling	3/32	82/18870	0.000358182015142409	0.0504013264164675	0.0361952352143908	DGKQ/DNM2/GAK	3
GO:0031060	GO:0031060	regulation of histone methylation	2/32	19/18870	0.000467910435034697	0.0564810109850798	0.0405613031065708	AUTS2/BAZ2A	2
GO:0006700	GO:0006700	C21-steroid hormone biosynthetic process	2/32	20/18870	0.000519350265242565	0.0564810109850798	0.0405613031065708	DGKQ/BMP6	2
GO:0010566	GO:0010566	regulation of ketone biosynthetic process	2/32	21/18870	0.000573411279036343	0.0564810109850798	0.0405613031065708	DGKQ/BMP6	2
GO:0046885	GO:0046885	regulation of hormone biosynthetic process	2/32	24/18870	0.000751236736497117	0.0623038537952265	0.0447429225224603	DGKQ/BMP6	2
GO:0034308	GO:0034308	primary alcohol metabolic process	3/32	106/18870	0.000759031721363165	0.0623038537952265	0.0447429225224603	DGKQ/BMP6/ACSS2	3
GO:0051261	GO:0051261	protein depolymerization	3/32	115/18870	0.000961438603937706	0.0714005036897043	0.0512755954896941	GAK/TMOD2/TMOD3	3
GO:0120255	GO:0120255	olefinic compound biosynthetic process	2/32	28/18870	0.00102452180612288	0.0714005036897043	0.0512755954896941	DGKQ/BMP6	2
GO:0016570	GO:0016570	histone modification	3/32	120/18870	0.00108731731507164	0.0714005036897043	0.0512755954896941	AUTS2/EP300/BAZ2A	3
GO:0051085	GO:0051085	chaperone cofactor-dependent protein refolding	2/32	32/18870	0.00133866974681608	0.0799734735778113	0.0574321926201327	GAK/HSPA5	2
GO:0090311	GO:0090311	regulation of protein deacetylation	2/32	35/18870	0.0016007774899047	0.0799734735778113	0.0574321926201327	EP300/BAZ2A	2
GO:0008277	GO:0008277	regulation of G protein-coupled receptor signaling pathway	3/32	139/18870	0.00165915318768477	0.0799734735778113	0.0574321926201327	GIPR/DGKQ/TMOD2	3
GO:0002068	GO:0002068	glandular epithelial cell development	2/32	36/18870	0.00169314979749422	0.0799734735778113	0.0574321926201327	BMP6/SLC9A4	2
GO:0008207	GO:0008207	C21-steroid hormone metabolic process	2/32	37/18870	0.0017880099734509	0.0799734735778113	0.0574321926201327	DGKQ/BMP6	2
GO:0051084	GO:0051084	'de novo' post-translational protein folding	2/32	37/18870	0.0017880099734509	0.0799734735778113	0.0574321926201327	GAK/HSPA5	2
GO:0016571	GO:0016571	histone methylation	2/32	38/18870	0.00188534984948852	0.0799734735778113	0.0574321926201327	AUTS2/BAZ2A	2
GO:0032350	GO:0032350	regulation of hormone metabolic process	2/32	39/18870	0.00198516127637526	0.0799734735778113	0.0574321926201327	DGKQ/BMP6	2
GO:0031056	GO:0031056	regulation of histone modification	2/32	40/18870	0.00208743612389574	0.0799734735778113	0.0574321926201327	AUTS2/BAZ2A	2
GO:0051693	GO:0051693	actin filament capping	2/32	40/18870	0.00208743612389574	0.0799734735778113	0.0574321926201327	TMOD2/TMOD3	2
GO:0006458	GO:0006458	'de novo' protein folding	2/32	41/18870	0.0021921662808131	0.0799734735778113	0.0574321926201327	GAK/HSPA5	2
GO:0072595	GO:0072595	maintenance of protein localization in organelle	2/32	41/18870	0.0021921662808131	0.0799734735778113	0.0574321926201327	RANGAP1/HSPA5	2
GO:1901875	GO:1901875	positive regulation of post-translational protein modification	3/32	159/18870	0.00243366519382634	0.0827730887590053	0.0594427097473166	AUTS2/HSPA5/BAZ2A	3
GO:0030835	GO:0030835	negative regulation of actin filament depolymerization	2/32	44/18870	0.00252100777946209	0.0827730887590053	0.0594427097473166	TMOD2/TMOD3	2
GO:0120178	GO:0120178	steroid hormone biosynthetic process	2/32	44/18870	0.00252100777946209	0.0827730887590053	0.0594427097473166	DGKQ/BMP6	2
GO:0031018	GO:0031018	endocrine pancreas development	2/32	46/18870	0.00275236413680041	0.0860831036858176	0.061819765617814	GIPR/BMP6	2
GO:1902904	GO:1902904	negative regulation of supramolecular fiber organization	3/32	167/18870	0.00279660844461539	0.0860831036858176	0.061819765617814	CHADL/TMOD2/TMOD3	3
GO:0042181	GO:0042181	ketone biosynthetic process	2/32	48/18870	0.00299334866650014	0.0893469223182616	0.0641636460570364	DGKQ/BMP6	2
GO:0016573	GO:0016573	histone acetylation	2/32	50/18870	0.00324389760765878	0.0918705849839581	0.0659759904987655	AUTS2/EP300	2
GO:0002066	GO:0002066	columnar/cuboidal epithelial cell development	2/32	52/18870	0.00350394749762323	0.0918705849839581	0.0659759904987655	BMP6/SLC9A4	2
GO:0006111	GO:0006111	regulation of gluconeogenesis	2/32	53/18870	0.00363751554758819	0.0918705849839581	0.0659759904987655	EP300/DGKQ	2
GO:0019933	GO:0019933	cAMP-mediated signaling	2/32	53/18870	0.00363751554758819	0.0918705849839581	0.0659759904987655	GIPR/DGKQ	2
GO:0030834	GO:0030834	regulation of actin filament depolymerization	2/32	53/18870	0.00363751554758819	0.0918705849839581	0.0659759904987655	TMOD2/TMOD3	2
GO:0032330	GO:0032330	regulation of chondrocyte differentiation	2/32	53/18870	0.00363751554758819	0.0918705849839581	0.0659759904987655	CHADL/BMP6	2
GO:0018393	GO:0018393	internal peptidyl-lysine acetylation	2/32	55/18870	0.0039116985177801	0.0939761717076438	0.0674880976623421	AUTS2/EP300	2
GO:1902930	GO:1902930	regulation of alcohol biosynthetic process	2/32	55/18870	0.0039116985177801	0.0939761717076438	0.0674880976623421	DGKQ/BMP6	2
GO:0006475	GO:0006475	internal protein amino acid acetylation	2/32	58/18870	0.00434047268260351	0.097167399826465	0.069779847911712	AUTS2/EP300	2
GO:0006476	GO:0006476	protein deacetylation	2/32	58/18870	0.00434047268260351	0.097167399826465	0.069779847911712	EP300/BAZ2A	2
GO:0030042	GO:0030042	actin filament depolymerization	2/32	58/18870	0.00434047268260351	0.097167399826465	0.069779847911712	TMOD2/TMOD3	2
GO:0099504	GO:0099504	synaptic vesicle cycle	3/32	198/18870	0.0045111325210299	0.0987436785158766	0.0709118375235577	DGKQ/DNM2/GAK	3
GO:0070050	GO:0070050	neuron cellular homeostasis	2/32	63/18870	0.00510124347295606	0.107868209763981	0.0774645332208336	TMEM175/CACNB2	2
GO:0043254	GO:0043254	regulation of protein-containing complex assembly	4/32	419/18870	0.00526907377959804	0.107868209763981	0.0774645332208336	EP300/HSPA5/TMOD2/TMOD3	4
GO:0043414	GO:0043414	macromolecule methylation	3/32	210/18870	0.00531326278533514	0.107868209763981	0.0774645332208336	AUTS2/SNRPD2/BAZ2A	3
GO:0032507	GO:0032507	maintenance of protein location in cell	2/32	65/18870	0.00542152303144049	0.107868209763981	0.0774645332208336	RANGAP1/HSPA5	2
GO:0030837	GO:0030837	negative regulation of actin filament polymerization	2/32	66/18870	0.0055850545156985	0.107868209763981	0.0774645332208336	TMOD2/TMOD3	2
GO:0042446	GO:0042446	hormone biosynthetic process	2/32	66/18870	0.0055850545156985	0.107868209763981	0.0774645332208336	DGKQ/BMP6	2
GO:0035601	GO:0035601	protein deacylation	2/32	67/18870	0.00575083695612881	0.108205083606616	0.077706455980386	EP300/BAZ2A	2
GO:0018394	GO:0018394	peptidyl-lysine acetylation	2/32	68/18870	0.00591886273983778	0.108205083606616	0.077706455980386	AUTS2/EP300	2
GO:0018205	GO:0018205	peptidyl-lysine modification	3/32	219/18870	0.00596788429660492	0.108205083606616	0.077706455980386	AUTS2/EP300/RANGAP1	3
GO:0099003	GO:0099003	vesicle-mediated transport in synapse	3/32	220/18870	0.00604347208726102	0.108205083606616	0.077706455980386	DGKQ/DNM2/GAK	3
GO:0098732	GO:0098732	macromolecule deacylation	2/32	70/18870	0.00626161397520521	0.108205083606616	0.077706455980386	EP300/BAZ2A	2
GO:1901880	GO:1901880	negative regulation of protein depolymerization	2/32	70/18870	0.00626161397520521	0.108205083606616	0.077706455980386	TMOD2/TMOD3	2
GO:0030239	GO:0030239	myofibril assembly	2/32	71/18870	0.00643632429065655	0.109306541832702	0.0784974577735245	TMOD2/TMOD3	2
GO:0061035	GO:0061035	regulation of cartilage development	2/32	72/18870	0.0066132476769006	0.109680179692665	0.0787657822639282	CHADL/BMP6	2
GO:0002067	GO:0002067	glandular epithelial cell differentiation	2/32	73/18870	0.00679237661040869	0.109680179692665	0.0787657822639282	BMP6/SLC9A4	2
GO:0055002	GO:0055002	striated muscle cell development	2/32	73/18870	0.00679237661040869	0.109680179692665	0.0787657822639282	TMOD2/TMOD3	2
GO:0061077	GO:0061077	chaperone-mediated protein folding	2/32	75/18870	0.00715722111389475	0.113707464470747	0.0816579386848433	GAK/HSPA5	2
GO:0031016	GO:0031016	pancreas development	2/32	79/18870	0.00791304762037939	0.117662766969816	0.0844984017138303	GIPR/BMP6	2
GO:0006479	GO:0006479	protein methylation	2/32	80/18870	0.00810740621376261	0.117662766969816	0.0844984017138303	AUTS2/BAZ2A	2
GO:0008213	GO:0008213	protein alkylation	2/32	80/18870	0.00810740621376261	0.117662766969816	0.0844984017138303	AUTS2/BAZ2A	2
GO:0032272	GO:0032272	negative regulation of protein polymerization	2/32	80/18870	0.00810740621376261	0.117662766969816	0.0844984017138303	TMOD2/TMOD3	2
GO:0043242	GO:0043242	negative regulation of protein-containing complex disassembly	2/32	80/18870	0.00810740621376261	0.117662766969816	0.0844984017138303	TMOD2/TMOD3	2
GO:0032984	GO:0032984	protein-containing complex disassembly	3/32	245/18870	0.0081229118314188	0.117662766969816	0.0844984017138303	GAK/TMOD2/TMOD3	3
GO:0050810	GO:0050810	regulation of steroid biosynthetic process	2/32	81/18870	0.00830391080275725	0.118541335372694	0.0851293372914245	DGKQ/BMP6	2
GO:0019935	GO:0019935	cyclic-nucleotide-mediated signaling	2/32	83/18870	0.0087033285253652	0.122468265678353	0.0879494250984273	GIPR/DGKQ	2
GO:0048678	GO:0048678	response to axon injury	2/32	84/18870	0.00890622698145361	0.123558219390589	0.088732165033904	RANGAP1/GIPR	2
GO:0061515	GO:0061515	myeloid cell development	2/32	85/18870	0.00911124207803354	0.124646853428653	0.0895139572578734	EP300/TMOD3	2
GO:1901879	GO:1901879	regulation of protein depolymerization	2/32	86/18870	0.0093183665197679	0.125734123588649	0.090294770025725	TMOD2/TMOD3	2
GO:0005996	GO:0005996	monosaccharide metabolic process	3/32	261/18870	0.00964995775613098	0.128448762024176	0.0922442619078239	EP300/IDUA/DGKQ	3
GO:0051453	GO:0051453	regulation of intracellular pH	2/32	89/18870	0.00995232322192725	0.130707178314645	0.0938661221773349	TMEM175/SLC9A4	2
GO:0006094	GO:0006094	gluconeogenesis	2/32	90/18870	0.0101678124365326	0.131780200657692	0.0946367030103864	EP300/DGKQ	2
GO:0019319	GO:0019319	hexose biosynthetic process	2/32	93/18870	0.0108266900936906	0.133303621778565	0.095730733460001	EP300/DGKQ	2
GO:0030641	GO:0030641	regulation of cellular pH	2/32	93/18870	0.0108266900936906	0.133303621778565	0.095730733460001	TMEM175/SLC9A4	2
GO:0045185	GO:0045185	maintenance of protein location	2/32	93/18870	0.0108266900936906	0.133303621778565	0.095730733460001	RANGAP1/HSPA5	2
GO:1903432	GO:1903432	regulation of TORC1 signaling	2/32	93/18870	0.0108266900936906	0.133303621778565	0.095730733460001	EP300/DGKQ	2
GO:0007611	GO:0007611	learning or memory	3/32	274/18870	0.0110064825994184	0.133844263708977	0.0961189903418995	EP300/NRXN3/TMOD2	3
GO:0032259	GO:0032259	methylation	3/32	282/18870	0.0118936556129617	0.1383720383662	0.0993705688293737	AUTS2/SNRPD2/BAZ2A	3
GO:1901873	GO:1901873	regulation of post-translational protein modification	3/32	284/18870	0.0121217373250298	0.1383720383662	0.0993705688293737	AUTS2/HSPA5/BAZ2A	3
GO:0038202	GO:0038202	TORC1 signaling	2/32	99/18870	0.0121996466407314	0.1383720383662	0.0993705688293737	EP300/DGKQ	2
GO:0061448	GO:0061448	connective tissue development	3/32	285/18870	0.0122367248876084	0.1383720383662	0.0993705688293737	FTO/CHADL/BMP6	3
GO:0006892	GO:0006892	post-Golgi vesicle-mediated transport	2/32	102/18870	0.0129133422134852	0.1383720383662	0.0993705688293737	DNM2/GAK	2
GO:0046364	GO:0046364	monosaccharide biosynthetic process	2/32	102/18870	0.0129133422134852	0.1383720383662	0.0993705688293737	EP300/DGKQ	2
GO:0006304	GO:0006304	DNA modification	2/32	103/18870	0.0131552259728509	0.1383720383662	0.0993705688293737	FTO/BAZ2A	2
GO:0006885	GO:0006885	regulation of pH	2/32	103/18870	0.0131552259728509	0.1383720383662	0.0993705688293737	TMEM175/SLC9A4	2
GO:0010906	GO:0010906	regulation of glucose metabolic process	2/32	103/18870	0.0131552259728509	0.1383720383662	0.0993705688293737	EP300/DGKQ	2
GO:0019218	GO:0019218	regulation of steroid metabolic process	2/32	104/18870	0.013399090687364	0.1383720383662	0.0993705688293737	DGKQ/BMP6	2
GO:0090100	GO:0090100	positive regulation of transmembrane receptor protein serine/threonine kinase signaling pathway	2/32	104/18870	0.013399090687364	0.1383720383662	0.0993705688293737	EP300/BMP6	2
GO:0043255	GO:0043255	regulation of carbohydrate biosynthetic process	2/32	105/18870	0.0136449293846342	0.1383720383662	0.0993705688293737	EP300/DGKQ	2
GO:0090092	GO:0090092	regulation of transmembrane receptor protein serine/threonine kinase signaling pathway	3/32	297/18870	0.0136660300446128	0.1383720383662	0.0993705688293737	EP300/BMP6/HSPA5	3
GO:0006473	GO:0006473	protein acetylation	2/32	106/18870	0.0138927351089279	0.1383720383662	0.0993705688293737	AUTS2/EP300	2
GO:0046822	GO:0046822	regulation of nucleocytoplasmic transport	2/32	109/18870	0.0146478851357557	0.1383720383662	0.0993705688293737	EP300/RANGAP1	2
GO:1902476	GO:1902476	chloride transmembrane transport	2/32	110/18870	0.0149034897427621	0.1383720383662	0.0993705688293737	SLC26A1/GABRB1	2
GO:0051222	GO:0051222	positive regulation of protein transport	3/32	308/18870	0.0150569651391944	0.1383720383662	0.0993705688293737	EP300/GIPR/BMP6	3
GO:0050890	GO:0050890	cognition	3/32	317/18870	0.0162528911379779	0.1383720383662	0.0993705688293737	EP300/NRXN3/TMOD2	3
GO:0002062	GO:0002062	chondrocyte differentiation	2/32	116/18870	0.0164774604190518	0.1383720383662	0.0993705688293737	CHADL/BMP6	2
GO:0001188	GO:0001188	RNA polymerase I preinitiation complex assembly	1/32	10/18870	0.0168332919345395	0.1383720383662	0.0993705688293737	BAZ2A	1
GO:0031666	GO:0031666	positive regulation of lipopolysaccharide-mediated signaling pathway	1/32	10/18870	0.0168332919345395	0.1383720383662	0.0993705688293737	BMP6	1
GO:0033572	GO:0033572	transferrin transport	1/32	10/18870	0.0168332919345395	0.1383720383662	0.0993705688293737	DNM2	1
GO:0034651	GO:0034651	cortisol biosynthetic process	1/32	10/18870	0.0168332919345395	0.1383720383662	0.0993705688293737	DGKQ	1
GO:0035066	GO:0035066	positive regulation of histone acetylation	1/32	10/18870	0.0168332919345395	0.1383720383662	0.0993705688293737	AUTS2	1
GO:0070344	GO:0070344	regulation of fat cell proliferation	1/32	10/18870	0.0168332919345395	0.1383720383662	0.0993705688293737	FTO	1
GO:1902645	GO:1902645	tertiary alcohol biosynthetic process	1/32	10/18870	0.0168332919345395	0.1383720383662	0.0993705688293737	DGKQ	1
GO:1990700	GO:1990700	nucleolar chromatin organization	1/32	10/18870	0.0168332919345395	0.1383720383662	0.0993705688293737	BAZ2A	1
GO:2000048	GO:2000048	negative regulation of cell-cell adhesion mediated by cadherin	1/32	10/18870	0.0168332919345395	0.1383720383662	0.0993705688293737	BMP6	1
GO:1904951	GO:1904951	positive regulation of establishment of protein localization	3/32	324/18870	0.0172192725247384	0.1383720383662	0.0993705688293737	EP300/GIPR/BMP6	3
GO:0048675	GO:0048675	axon extension	2/32	121/18870	0.017841184896961	0.1383720383662	0.0993705688293737	AUTS2/DNM2	2
GO:0048545	GO:0048545	response to steroid hormone	3/32	330/18870	0.0180729168410214	0.1383720383662	0.0993705688293737	EP300/GABRB1/BMP6	3
GO:0002065	GO:0002065	columnar/cuboidal epithelial cell differentiation	2/32	123/18870	0.0183997274706314	0.1383720383662	0.0993705688293737	BMP6/SLC9A4	2
GO:0043244	GO:0043244	regulation of protein-containing complex disassembly	2/32	123/18870	0.0183997274706314	0.1383720383662	0.0993705688293737	TMOD2/TMOD3	2
GO:0006983	GO:0006983	ER overload response	1/32	11/18870	0.0185014432949898	0.1383720383662	0.0993705688293737	HSPA5	1
GO:0030167	GO:0030167	proteoglycan catabolic process	1/32	11/18870	0.0185014432949898	0.1383720383662	0.0993705688293737	IDUA	1
GO:0031943	GO:0031943	regulation of glucocorticoid metabolic process	1/32	11/18870	0.0185014432949898	0.1383720383662	0.0993705688293737	DGKQ	1
GO:0032342	GO:0032342	aldosterone biosynthetic process	1/32	11/18870	0.0185014432949898	0.1383720383662	0.0993705688293737	BMP6	1
GO:0034776	GO:0034776	response to histamine	1/32	11/18870	0.0185014432949898	0.1383720383662	0.0993705688293737	GABRB1	1
GO:0034975	GO:0034975	protein folding in endoplasmic reticulum	1/32	11/18870	0.0185014432949898	0.1383720383662	0.0993705688293737	HSPA5	1
GO:0046834	GO:0046834	lipid phosphorylation	1/32	11/18870	0.0185014432949898	0.1383720383662	0.0993705688293737	DGKQ	1
GO:0086016	GO:0086016	AV node cell action potential	1/32	11/18870	0.0185014432949898	0.1383720383662	0.0993705688293737	CACNB2	1
GO:0086027	GO:0086027	AV node cell to bundle of His cell signaling	1/32	11/18870	0.0185014432949898	0.1383720383662	0.0993705688293737	CACNB2	1
GO:1901841	GO:1901841	regulation of high voltage-gated calcium channel activity	1/32	11/18870	0.0185014432949898	0.1383720383662	0.0993705688293737	CACNB2	1
GO:1903897	GO:1903897	regulation of PERK-mediated unfolded protein response	1/32	11/18870	0.0185014432949898	0.1383720383662	0.0993705688293737	HSPA5	1
GO:1990440	GO:1990440	positive regulation of transcription from RNA polymerase II promoter in response to endoplasmic reticulum stress	1/32	11/18870	0.0185014432949898	0.1383720383662	0.0993705688293737	HSPA5	1
GO:2000833	GO:2000833	positive regulation of steroid hormone secretion	1/32	11/18870	0.0185014432949898	0.1383720383662	0.0993705688293737	BMP6	1
GO:0006821	GO:0006821	chloride transport	2/32	125/18870	0.0189656485965156	0.1383720383662	0.0993705688293737	SLC26A1/GABRB1	2
GO:0062012	GO:0062012	regulation of small molecule metabolic process	3/32	337/18870	0.0190984576764315	0.1383720383662	0.0993705688293737	EP300/DGKQ/BMP6	3
GO:0010927	GO:0010927	cellular component assembly involved in morphogenesis	2/32	128/18870	0.0198282489827847	0.1383720383662	0.0993705688293737	TMOD2/TMOD3	2
GO:0005984	GO:0005984	disaccharide metabolic process	1/32	12/18870	0.0201668525857565	0.1383720383662	0.0993705688293737	IDUA	1
GO:0006705	GO:0006705	mineralocorticoid biosynthetic process	1/32	12/18870	0.0201668525857565	0.1383720383662	0.0993705688293737	BMP6	1
GO:0016479	GO:0016479	negative regulation of transcription by RNA polymerase I	1/32	12/18870	0.0201668525857565	0.1383720383662	0.0993705688293737	BAZ2A	1
GO:0019532	GO:0019532	oxalate transport	1/32	12/18870	0.0201668525857565	0.1383720383662	0.0993705688293737	SLC26A1	1
GO:0034650	GO:0034650	cortisol metabolic process	1/32	12/18870	0.0201668525857565	0.1383720383662	0.0993705688293737	DGKQ	1
GO:0035437	GO:0035437	maintenance of protein localization in endoplasmic reticulum	1/32	12/18870	0.0201668525857565	0.1383720383662	0.0993705688293737	HSPA5	1
GO:0050655	GO:0050655	dermatan sulfate proteoglycan metabolic process	1/32	12/18870	0.0201668525857565	0.1383720383662	0.0993705688293737	IDUA	1
GO:0071233	GO:0071233	cellular response to leucine	1/32	12/18870	0.0201668525857565	0.1383720383662	0.0993705688293737	EP300	1
GO:0086067	GO:0086067	AV node cell to bundle of His cell communication	1/32	12/18870	0.0201668525857565	0.1383720383662	0.0993705688293737	CACNB2	1
GO:0090160	GO:0090160	Golgi to lysosome transport	1/32	12/18870	0.0201668525857565	0.1383720383662	0.0993705688293737	GAK	1
GO:0090312	GO:0090312	positive regulation of protein deacetylation	1/32	12/18870	0.0201668525857565	0.1383720383662	0.0993705688293737	BAZ2A	1
GO:0071496	GO:0071496	cellular response to external stimulus	3/32	346/18870	0.0204640081794634	0.1383720383662	0.0993705688293737	EP300/BMP6/HSPA5	3
GO:0098661	GO:0098661	inorganic anion transmembrane transport	2/32	131/18870	0.02070715355626	0.1383720383662	0.0993705688293737	SLC26A1/GABRB1	2
GO:0051235	GO:0051235	maintenance of location	3/32	350/18870	0.02108792392504	0.1383720383662	0.0993705688293737	FTO/RANGAP1/HSPA5	3
GO:0006936	GO:0006936	muscle contraction	3/32	351/18870	0.0212455397206045	0.1383720383662	0.0993705688293737	CACNB2/TMOD2/TMOD3	3
GO:0001696	GO:0001696	gastric acid secretion	1/32	13/18870	0.0218295241690233	0.1383720383662	0.0993705688293737	SLC9A4	1
GO:0032341	GO:0032341	aldosterone metabolic process	1/32	13/18870	0.0218295241690233	0.1383720383662	0.0993705688293737	BMP6	1
GO:0051569	GO:0051569	regulation of histone H3-K4 methylation	1/32	13/18870	0.0218295241690233	0.1383720383662	0.0993705688293737	AUTS2	1
GO:0051571	GO:0051571	positive regulation of histone H3-K4 methylation	1/32	13/18870	0.0218295241690233	0.1383720383662	0.0993705688293737	AUTS2	1
GO:0070493	GO:0070493	thrombin-activated receptor signaling pathway	1/32	13/18870	0.0218295241690233	0.1383720383662	0.0993705688293737	DGKQ	1
GO:0030833	GO:0030833	regulation of actin filament polymerization	2/32	136/18870	0.0222077462751789	0.1383720383662	0.0993705688293737	TMOD2/TMOD3	2
GO:0010038	GO:0010038	response to metal ion	3/32	359/18870	0.0225300557747283	0.1383720383662	0.0993705688293737	GIPR/BMP6/GSS	3
GO:0035270	GO:0035270	endocrine system development	2/32	139/18870	0.0231292675306068	0.1383720383662	0.0993705688293737	GIPR/BMP6	2
GO:0006361	GO:0006361	transcription initiation at RNA polymerase I promoter	1/32	14/18870	0.0234894624002688	0.1383720383662	0.0993705688293737	BAZ2A	1
GO:0008212	GO:0008212	mineralocorticoid metabolic process	1/32	14/18870	0.0234894624002688	0.1383720383662	0.0993705688293737	BMP6	1
GO:0043967	GO:0043967	histone H4 acetylation	1/32	14/18870	0.0234894624002688	0.1383720383662	0.0993705688293737	AUTS2	1
GO:0070341	GO:0070341	fat cell proliferation	1/32	14/18870	0.0234894624002688	0.1383720383662	0.0993705688293737	FTO	1
GO:0070989	GO:0070989	oxidative demethylation	1/32	14/18870	0.0234894624002688	0.1383720383662	0.0993705688293737	FTO	1
GO:0090385	GO:0090385	phagosome-lysosome fusion	1/32	14/18870	0.0234894624002688	0.1383720383662	0.0993705688293737	TMEM175	1
GO:1903894	GO:1903894	regulation of IRE1-mediated unfolded protein response	1/32	14/18870	0.0234894624002688	0.1383720383662	0.0993705688293737	HSPA5	1
GO:0046887	GO:0046887	positive regulation of hormone secretion	2/32	141/18870	0.0237523267726707	0.1383720383662	0.0993705688293737	GIPR/BMP6	2
GO:0032535	GO:0032535	regulation of cellular component size	3/32	370/18870	0.0243647997693265	0.1383720383662	0.0993705688293737	DNM2/TMOD2/TMOD3	3
GO:0010565	GO:0010565	regulation of cellular ketone metabolic process	2/32	144/18870	0.024699855527663	0.1383720383662	0.0993705688293737	DGKQ/BMP6	2
GO:0050714	GO:0050714	positive regulation of protein secretion	2/32	144/18870	0.024699855527663	0.1383720383662	0.0993705688293737	GIPR/BMP6	2
GO:0006066	GO:0006066	alcohol metabolic process	3/32	373/18870	0.0248789646338591	0.1383720383662	0.0993705688293737	DGKQ/BMP6/ACSS2	3
GO:0046165	GO:0046165	alcohol biosynthetic process	2/32	145/18870	0.0250191236797477	0.1383720383662	0.0993705688293737	DGKQ/BMP6	2
GO:0032352	GO:0032352	positive regulation of hormone metabolic process	1/32	15/18870	0.0251466716282698	0.1383720383662	0.0993705688293737	BMP6	1
GO:0043201	GO:0043201	response to leucine	1/32	15/18870	0.0251466716282698	0.1383720383662	0.0993705688293737	EP300	1
GO:0043950	GO:0043950	positive regulation of cAMP-mediated signaling	1/32	15/18870	0.0251466716282698	0.1383720383662	0.0993705688293737	GIPR	1
GO:0044065	GO:0044065	regulation of respiratory system process	1/32	15/18870	0.0251466716282698	0.1383720383662	0.0993705688293737	FTO	1
GO:0099509	GO:0099509	regulation of presynaptic cytosolic calcium ion concentration	1/32	15/18870	0.0251466716282698	0.1383720383662	0.0993705688293737	CACNB2	1
GO:1900102	GO:1900102	negative regulation of endoplasmic reticulum unfolded protein response	1/32	15/18870	0.0251466716282698	0.1383720383662	0.0993705688293737	HSPA5	1
GO:1903054	GO:1903054	negative regulation of extracellular matrix organization	1/32	15/18870	0.0251466716282698	0.1383720383662	0.0993705688293737	CHADL	1
GO:0032006	GO:0032006	regulation of TOR signaling	2/32	147/18870	0.0256627599130161	0.1383720383662	0.0993705688293737	EP300/DGKQ	2
GO:0035264	GO:0035264	multicellular organism growth	2/32	147/18870	0.0256627599130161	0.1383720383662	0.0993705688293737	FTO/EP300	2
GO:0043543	GO:0043543	protein acylation	2/32	147/18870	0.0256627599130161	0.1383720383662	0.0993705688293737	AUTS2/EP300	2
GO:0098656	GO:0098656	monoatomic anion transmembrane transport	2/32	147/18870	0.0256627599130161	0.1383720383662	0.0993705688293737	SLC26A1/GABRB1	2
GO:0006474	GO:0006474	N-terminal protein amino acid acetylation	1/32	16/18870	0.0268011561951168	0.1383720383662	0.0993705688293737	EP300	1
GO:0006620	GO:0006620	post-translational protein targeting to endoplasmic reticulum membrane	1/32	16/18870	0.0268011561951168	0.1383720383662	0.0993705688293737	HSPA5	1
GO:0006704	GO:0006704	glucocorticoid biosynthetic process	1/32	16/18870	0.0268011561951168	0.1383720383662	0.0993705688293737	DGKQ	1
GO:0006750	GO:0006750	glutathione biosynthetic process	1/32	16/18870	0.0268011561951168	0.1383720383662	0.0993705688293737	GSS	1
GO:0007158	GO:0007158	neuron cell-cell adhesion	1/32	16/18870	0.0268011561951168	0.1383720383662	0.0993705688293737	NRXN3	1
GO:0042448	GO:0042448	progesterone metabolic process	1/32	16/18870	0.0268011561951168	0.1383720383662	0.0993705688293737	DGKQ	1
GO:0046184	GO:0046184	aldehyde biosynthetic process	1/32	16/18870	0.0268011561951168	0.1383720383662	0.0993705688293737	BMP6	1
GO:0046459	GO:0046459	short-chain fatty acid metabolic process	1/32	16/18870	0.0268011561951168	0.1383720383662	0.0993705688293737	ACSS2	1
GO:0048532	GO:0048532	anatomical structure arrangement	1/32	16/18870	0.0268011561951168	0.1383720383662	0.0993705688293737	HSPA5	1
GO:1900034	GO:1900034	regulation of cellular response to heat	1/32	16/18870	0.0268011561951168	0.1383720383662	0.0993705688293737	EP300	1
GO:1902358	GO:1902358	sulfate transmembrane transport	1/32	16/18870	0.0268011561951168	0.1383720383662	0.0993705688293737	SLC26A1	1
GO:2000758	GO:2000758	positive regulation of peptidyl-lysine acetylation	1/32	16/18870	0.0268011561951168	0.1383720383662	0.0993705688293737	AUTS2	1
GO:2000846	GO:2000846	regulation of corticosteroid hormone secretion	1/32	16/18870	0.0268011561951168	0.1383720383662	0.0993705688293737	BMP6	1
GO:1902903	GO:1902903	regulation of supramolecular fiber organization	3/32	389/18870	0.0277209107895573	0.1383720383662	0.0993705688293737	CHADL/TMOD2/TMOD3	3
GO:0008064	GO:0008064	regulation of actin polymerization or depolymerization	2/32	154/18870	0.0279683775756651	0.1383720383662	0.0993705688293737	TMOD2/TMOD3	2
GO:0007000	GO:0007000	nucleolus organization	1/32	17/18870	0.0284529204362196	0.1383720383662	0.0993705688293737	BAZ2A	1
GO:0008272	GO:0008272	sulfate transport	1/32	17/18870	0.0284529204362196	0.1383720383662	0.0993705688293737	SLC26A1	1
GO:0030202	GO:0030202	heparin metabolic process	1/32	17/18870	0.0284529204362196	0.1383720383662	0.0993705688293737	IDUA	1
GO:0043923	GO:0043923	positive regulation by host of viral transcription	1/32	17/18870	0.0284529204362196	0.1383720383662	0.0993705688293737	EP300	1
GO:0048268	GO:0048268	clathrin coat assembly	1/32	17/18870	0.0284529204362196	0.1383720383662	0.0993705688293737	GAK	1
GO:1902514	GO:1902514	regulation of calcium ion transmembrane transport via high voltage-gated calcium channel	1/32	17/18870	0.0284529204362196	0.1383720383662	0.0993705688293737	CACNB2	1
GO:1903729	GO:1903729	regulation of plasma membrane organization	1/32	17/18870	0.0284529204362196	0.1383720383662	0.0993705688293737	DNM2	1
GO:0030832	GO:0030832	regulation of actin filament length	2/32	157/18870	0.0289813122764496	0.1383720383662	0.0993705688293737	TMOD2/TMOD3	2
GO:0017015	GO:0017015	regulation of transforming growth factor beta receptor signaling pathway	2/32	160/18870	0.0300088942647931	0.1383720383662	0.0993705688293737	EP300/HSPA5	2
GO:1902600	GO:1902600	proton transmembrane transport	2/32	160/18870	0.0300088942647931	0.1383720383662	0.0993705688293737	TMEM175/SLC9A4	2
GO:0006085	GO:0006085	acetyl-CoA biosynthetic process	1/32	18/18870	0.0301019686803211	0.1383720383662	0.0993705688293737	ACSS2	1
GO:0019184	GO:0019184	nonribosomal peptide biosynthetic process	1/32	18/18870	0.0301019686803211	0.1383720383662	0.0993705688293737	GSS	1
GO:0035065	GO:0035065	regulation of histone acetylation	1/32	18/18870	0.0301019686803211	0.1383720383662	0.0993705688293737	AUTS2	1
GO:0036003	GO:0036003	positive regulation of transcription from RNA polymerase II promoter in response to stress	1/32	18/18870	0.0301019686803211	0.1383720383662	0.0993705688293737	HSPA5	1
GO:0036499	GO:0036499	PERK-mediated unfolded protein response	1/32	18/18870	0.0301019686803211	0.1383720383662	0.0993705688293737	HSPA5	1
GO:0043117	GO:0043117	positive regulation of vascular permeability	1/32	18/18870	0.0301019686803211	0.1383720383662	0.0993705688293737	BMP6	1
GO:0120254	GO:0120254	olefinic compound metabolic process	2/32	162/18870	0.0307020048602395	0.1383720383662	0.0993705688293737	DGKQ/BMP6	2
GO:0016052	GO:0016052	carbohydrate catabolic process	2/32	163/18870	0.0310509587142062	0.1383720383662	0.0993705688293737	EP300/IDUA	2
GO:0051494	GO:0051494	negative regulation of cytoskeleton organization	2/32	163/18870	0.0310509587142062	0.1383720383662	0.0993705688293737	TMOD2/TMOD3	2
GO:1903844	GO:1903844	regulation of cellular response to transforming growth factor beta stimulus	2/32	163/18870	0.0310509587142062	0.1383720383662	0.0993705688293737	EP300/HSPA5	2
GO:0007178	GO:0007178	transmembrane receptor protein serine/threonine kinase signaling pathway	3/32	410/18870	0.031705480926717	0.1383720383662	0.0993705688293737	EP300/BMP6/HSPA5	3
GO:0001845	GO:0001845	phagolysosome assembly	1/32	19/18870	0.0317483052495038	0.1383720383662	0.0993705688293737	TMEM175	1
GO:0010801	GO:0010801	negative regulation of peptidyl-threonine phosphorylation	1/32	19/18870	0.0317483052495038	0.1383720383662	0.0993705688293737	DGKQ	1
GO:0032026	GO:0032026	response to magnesium ion	1/32	19/18870	0.0317483052495038	0.1383720383662	0.0993705688293737	BMP6	1
GO:0035930	GO:0035930	corticosteroid hormone secretion	1/32	19/18870	0.0317483052495038	0.1383720383662	0.0993705688293737	BMP6	1
GO:0045603	GO:0045603	positive regulation of endothelial cell differentiation	1/32	19/18870	0.0317483052495038	0.1383720383662	0.0993705688293737	BMP6	1
GO:0045721	GO:0045721	negative regulation of gluconeogenesis	1/32	19/18870	0.0317483052495038	0.1383720383662	0.0993705688293737	EP300	1
GO:0061577	GO:0061577	calcium ion transmembrane transport via high voltage-gated calcium channel	1/32	19/18870	0.0317483052495038	0.1383720383662	0.0993705688293737	CACNB2	1
GO:0071625	GO:0071625	vocalization behavior	1/32	19/18870	0.0317483052495038	0.1383720383662	0.0993705688293737	NRXN3	1
GO:0086014	GO:0086014	atrial cardiac muscle cell action potential	1/32	19/18870	0.0317483052495038	0.1383720383662	0.0993705688293737	CACNB2	1
GO:0086026	GO:0086026	atrial cardiac muscle cell to AV node cell signaling	1/32	19/18870	0.0317483052495038	0.1383720383662	0.0993705688293737	CACNB2	1
GO:0086066	GO:0086066	atrial cardiac muscle cell to AV node cell communication	1/32	19/18870	0.0317483052495038	0.1383720383662	0.0993705688293737	CACNB2	1
GO:0097320	GO:0097320	plasma membrane tubulation	1/32	19/18870	0.0317483052495038	0.1383720383662	0.0993705688293737	DNM2	1
GO:1900242	GO:1900242	regulation of synaptic vesicle endocytosis	1/32	19/18870	0.0317483052495038	0.1383720383662	0.0993705688293737	DGKQ	1
GO:0030041	GO:0030041	actin filament polymerization	2/32	167/18870	0.032462623621104	0.139368878992852	0.100086440484314	TMOD2/TMOD3	2
GO:0031929	GO:0031929	TOR signaling	2/32	167/18870	0.032462623621104	0.139368878992852	0.100086440484314	EP300/DGKQ	2
GO:0050731	GO:0050731	positive regulation of peptidyl-tyrosine phosphorylation	2/32	168/18870	0.0328194721786066	0.139368878992852	0.100086440484314	DGKQ/BMP6	2
GO:0015698	GO:0015698	inorganic anion transport	2/32	169/18870	0.0331778817030404	0.139368878992852	0.100086440484314	SLC26A1/GABRB1	2
GO:0002029	GO:0002029	desensitization of G protein-coupled receptor signaling pathway	1/32	20/18870	0.0333919344592012	0.139368878992852	0.100086440484314	GIPR	1
GO:0006896	GO:0006896	Golgi to vacuole transport	1/32	20/18870	0.0333919344592012	0.139368878992852	0.100086440484314	GAK	1
GO:0032332	GO:0032332	positive regulation of chondrocyte differentiation	1/32	20/18870	0.0333919344592012	0.139368878992852	0.100086440484314	BMP6	1
GO:0035020	GO:0035020	regulation of Rac protein signal transduction	1/32	20/18870	0.0333919344592012	0.139368878992852	0.100086440484314	AUTS2	1
GO:0036498	GO:0036498	IRE1-mediated unfolded protein response	1/32	20/18870	0.0333919344592012	0.139368878992852	0.100086440484314	HSPA5	1
GO:0051568	GO:0051568	histone H3-K4 methylation	1/32	20/18870	0.0333919344592012	0.139368878992852	0.100086440484314	AUTS2	1
GO:0006820	GO:0006820	monoatomic anion transport	2/32	172/18870	0.0342624165801836	0.142398651187683	0.102262242691021	SLC26A1/GABRB1	2
GO:0006067	GO:0006067	ethanol metabolic process	1/32	21/18870	0.0350328606182096	0.142592428549324	0.102401402068016	ACSS2	1
GO:0022401	GO:0022401	negative adaptation of signaling pathway	1/32	21/18870	0.0350328606182096	0.142592428549324	0.102401402068016	GIPR	1
GO:0044030	GO:0044030	regulation of DNA methylation	1/32	21/18870	0.0350328606182096	0.142592428549324	0.102401402068016	BAZ2A	1
GO:0090043	GO:0090043	regulation of tubulin deacetylation	1/32	21/18870	0.0350328606182096	0.142592428549324	0.102401402068016	EP300	1
GO:2000047	GO:2000047	regulation of cell-cell adhesion mediated by cadherin	1/32	21/18870	0.0350328606182096	0.142592428549324	0.102401402068016	BMP6	1
GO:0030220	GO:0030220	platelet formation	1/32	22/18870	0.0366710880286942	0.146238954284469	0.105020119988419	EP300	1
GO:0086012	GO:0086012	membrane depolarization during cardiac muscle cell action potential	1/32	22/18870	0.0366710880286942	0.146238954284469	0.105020119988419	CACNB2	1
GO:1902644	GO:1902644	tertiary alcohol metabolic process	1/32	22/18870	0.0366710880286942	0.146238954284469	0.105020119988419	DGKQ	1
GO:2000679	GO:2000679	positive regulation of transcription regulatory region DNA binding	1/32	22/18870	0.0366710880286942	0.146238954284469	0.105020119988419	EP300	1
GO:2000831	GO:2000831	regulation of steroid hormone secretion	1/32	22/18870	0.0366710880286942	0.146238954284469	0.105020119988419	BMP6	1
GO:1990138	GO:1990138	neuron projection extension	2/32	179/18870	0.036846526773588	0.146248146013207	0.105026720941357	AUTS2/DNM2	2
GO:0009451	GO:0009451	RNA modification	2/32	180/18870	0.0372217169635101	0.146248146013207	0.105026720941357	FTO/SNRPD2	2
GO:0002223	GO:0002223	stimulatory C-type lectin receptor signaling pathway	1/32	23/18870	0.0383066209862003	0.146248146013207	0.105026720941357	EP300	1
GO:0010893	GO:0010893	positive regulation of steroid biosynthetic process	1/32	23/18870	0.0383066209862003	0.146248146013207	0.105026720941357	BMP6	1
GO:0016575	GO:0016575	histone deacetylation	1/32	23/18870	0.0383066209862003	0.146248146013207	0.105026720941357	BAZ2A	1
GO:0035855	GO:0035855	megakaryocyte development	1/32	23/18870	0.0383066209862003	0.146248146013207	0.105026720941357	EP300	1
GO:0046823	GO:0046823	negative regulation of nucleocytoplasmic transport	1/32	23/18870	0.0383066209862003	0.146248146013207	0.105026720941357	RANGAP1	1
GO:0051457	GO:0051457	maintenance of protein location in nucleus	1/32	23/18870	0.0383066209862003	0.146248146013207	0.105026720941357	RANGAP1	1
GO:0090042	GO:0090042	tubulin deacetylation	1/32	23/18870	0.0383066209862003	0.146248146013207	0.105026720941357	EP300	1
GO:1990840	GO:1990840	response to lectin	1/32	23/18870	0.0383066209862003	0.146248146013207	0.105026720941357	EP300	1
GO:1990858	GO:1990858	cellular response to lectin	1/32	23/18870	0.0383066209862003	0.146248146013207	0.105026720941357	EP300	1
GO:0006694	GO:0006694	steroid biosynthetic process	2/32	184/18870	0.0387373243424046	0.147321484468218	0.105797528787222	DGKQ/BMP6	2
GO:0007409	GO:0007409	axonogenesis	3/32	448/18870	0.0396450952717018	0.147896134672821	0.106210208389138	AUTS2/NRXN3/DNM2	3
GO:0003323	GO:0003323	type B pancreatic cell development	1/32	24/18870	0.0399394637796654	0.147896134672821	0.106210208389138	BMP6	1
GO:0023058	GO:0023058	adaptation of signaling pathway	1/32	24/18870	0.0399394637796654	0.147896134672821	0.106210208389138	GIPR	1
GO:0030539	GO:0030539	male genitalia development	1/32	24/18870	0.0399394637796654	0.147896134672821	0.106210208389138	BMP6	1
GO:0036344	GO:0036344	platelet morphogenesis	1/32	24/18870	0.0399394637796654	0.147896134672821	0.106210208389138	EP300	1
GO:0043576	GO:0043576	regulation of respiratory gaseous exchange	1/32	24/18870	0.0399394637796654	0.147896134672821	0.106210208389138	FTO	1
GO:1903241	GO:1903241	U2-type prespliceosome assembly	1/32	24/18870	0.0399394637796654	0.147896134672821	0.106210208389138	SNRPD2	1
GO:0006109	GO:0006109	regulation of carbohydrate metabolic process	2/32	188/18870	0.0402764102185001	0.148585258671246	0.106705096261904	EP300/DGKQ	2
GO:0003012	GO:0003012	muscle system process	3/32	452/18870	0.0405350241600606	0.148894823203838	0.106927407099096	CACNB2/TMOD2/TMOD3	3
GO:0046890	GO:0046890	regulation of lipid biosynthetic process	2/32	189/18870	0.0406648073284259	0.148894823203838	0.106927407099096	DGKQ/BMP6	2
GO:0007190	GO:0007190	activation of adenylate cyclase activity	1/32	25/18870	0.0415696206914268	0.148894823203838	0.106927407099096	GIPR	1
GO:0008211	GO:0008211	glucocorticoid metabolic process	1/32	25/18870	0.0415696206914268	0.148894823203838	0.106927407099096	DGKQ	1
GO:0032331	GO:0032331	negative regulation of chondrocyte differentiation	1/32	25/18870	0.0415696206914268	0.148894823203838	0.106927407099096	CHADL	1
GO:0060586	GO:0060586	multicellular organismal-level iron ion homeostasis	1/32	25/18870	0.0415696206914268	0.148894823203838	0.106927407099096	BMP6	1
GO:0090335	GO:0090335	regulation of brown fat cell differentiation	1/32	25/18870	0.0415696206914268	0.148894823203838	0.106927407099096	FTO	1
GO:1901985	GO:1901985	positive regulation of protein acetylation	1/32	25/18870	0.0415696206914268	0.148894823203838	0.106927407099096	AUTS2	1
GO:0006006	GO:0006006	glucose metabolic process	2/32	193/18870	0.0422327282063809	0.150721874214801	0.108239486478596	EP300/DGKQ	2
GO:0055001	GO:0055001	muscle cell development	2/32	195/18870	0.0430252092548232	0.151961212704543	0.109129505677214	TMOD2/TMOD3	2
GO:0060391	GO:0060391	positive regulation of SMAD protein signal transduction	1/32	26/18870	0.0431970959972305	0.151961212704543	0.109129505677214	BMP6	1
GO:0098719	GO:0098719	sodium ion import across plasma membrane	1/32	26/18870	0.0431970959972305	0.151961212704543	0.109129505677214	SLC9A4	1
GO:1903421	GO:1903421	regulation of synaptic vesicle recycling	1/32	26/18870	0.0431970959972305	0.151961212704543	0.109129505677214	DGKQ	1
GO:0008154	GO:0008154	actin polymerization or depolymerization	2/32	196/18870	0.0434235603154377	0.152214259468705	0.109311228814288	TMOD2/TMOD3	2
GO:0007205	GO:0007205	protein kinase C-activating G protein-coupled receptor signaling pathway	1/32	27/18870	0.044821893966244	0.153297102627605	0.110088862373231	DGKQ	1
GO:0035929	GO:0035929	steroid hormone secretion	1/32	27/18870	0.044821893966244	0.153297102627605	0.110088862373231	BMP6	1
GO:0042026	GO:0042026	protein refolding	1/32	27/18870	0.044821893966244	0.153297102627605	0.110088862373231	HSPA5	1
GO:0045745	GO:0045745	positive regulation of G protein-coupled receptor signaling pathway	1/32	27/18870	0.044821893966244	0.153297102627605	0.110088862373231	TMOD2	1
GO:0045940	GO:0045940	positive regulation of steroid metabolic process	1/32	27/18870	0.044821893966244	0.153297102627605	0.110088862373231	BMP6	1
GO:0046339	GO:0046339	diacylglycerol metabolic process	1/32	27/18870	0.044821893966244	0.153297102627605	0.110088862373231	DGKQ	1
GO:1902932	GO:1902932	positive regulation of alcohol biosynthetic process	1/32	27/18870	0.044821893966244	0.153297102627605	0.110088862373231	BMP6	1
GO:1903829	GO:1903829	positive regulation of protein localization	3/32	476/18870	0.0460886048249592	0.154551887088336	0.110989973949625	EP300/GIPR/BMP6	3
GO:0006027	GO:0006027	glycosaminoglycan catabolic process	1/32	28/18870	0.0464440188610634	0.154551887088336	0.110989973949625	IDUA	1
GO:0010592	GO:0010592	positive regulation of lamellipodium assembly	1/32	28/18870	0.0464440188610634	0.154551887088336	0.110989973949625	AUTS2	1
GO:0021680	GO:0021680	cerebellar Purkinje cell layer development	1/32	28/18870	0.0464440188610634	0.154551887088336	0.110989973949625	HSPA5	1
GO:0031365	GO:0031365	N-terminal protein amino acid modification	1/32	28/18870	0.0464440188610634	0.154551887088336	0.110989973949625	EP300	1
GO:0031664	GO:0031664	regulation of lipopolysaccharide-mediated signaling pathway	1/32	28/18870	0.0464440188610634	0.154551887088336	0.110989973949625	BMP6	1
GO:0086010	GO:0086010	membrane depolarization during action potential	1/32	28/18870	0.0464440188610634	0.154551887088336	0.110989973949625	CACNB2	1
GO:2000756	GO:2000756	regulation of peptidyl-lysine acetylation	1/32	28/18870	0.0464440188610634	0.154551887088336	0.110989973949625	AUTS2	1
GO:0032271	GO:0032271	regulation of protein polymerization	2/32	204/18870	0.0466602887136356	0.154748768966098	0.111131362805469	TMOD2/TMOD3	2
GO:0051216	GO:0051216	cartilage development	2/32	207/18870	0.0478965785125864	0.155731982939666	0.111837448608555	CHADL/BMP6	2
GO:0006656	GO:0006656	phosphatidylcholine biosynthetic process	1/32	29/18870	0.0480634749377243	0.155731982939666	0.111837448608555	SLC44A2	1
GO:0007214	GO:0007214	gamma-aminobutyric acid signaling pathway	1/32	29/18870	0.0480634749377243	0.155731982939666	0.111837448608555	GABRB1	1
GO:0015697	GO:0015697	quaternary ammonium group transport	1/32	29/18870	0.0480634749377243	0.155731982939666	0.111837448608555	SLC44A2	1
GO:0043949	GO:0043949	regulation of cAMP-mediated signaling	1/32	29/18870	0.0480634749377243	0.155731982939666	0.111837448608555	GIPR	1
GO:0060765	GO:0060765	regulation of androgen receptor signaling pathway	1/32	29/18870	0.0480634749377243	0.155731982939666	0.111837448608555	EP300	1
GO:0099505	GO:0099505	regulation of presynaptic membrane potential	1/32	29/18870	0.0480634749377243	0.155731982939666	0.111837448608555	GABRB1	1
GO:0031032	GO:0031032	actomyosin structure organization	2/32	208/18870	0.0483113607199823	0.156021935439943	0.112045675250485	TMOD2/TMOD3	2
GO:0046474	GO:0046474	glycerophospholipid biosynthetic process	2/32	210/18870	0.0491449210686396	0.1563420525528	0.112275564323251	DGKQ/SLC44A2	2
GO:0003309	GO:0003309	type B pancreatic cell differentiation	1/32	30/18870	0.0496802664457122	0.1563420525528	0.112275564323251	BMP6	1
GO:0010039	GO:0010039	response to iron ion	1/32	30/18870	0.0496802664457122	0.1563420525528	0.112275564323251	BMP6	1
GO:0034067	GO:0034067	protein localization to Golgi apparatus	1/32	30/18870	0.0496802664457122	0.1563420525528	0.112275564323251	GAK	1
GO:0035751	GO:0035751	regulation of lysosomal lumen pH	1/32	30/18870	0.0496802664457122	0.1563420525528	0.112275564323251	TMEM175	1
GO:0090382	GO:0090382	phagosome maturation	1/32	30/18870	0.0496802664457122	0.1563420525528	0.112275564323251	TMEM175	1
GO:1900101	GO:1900101	regulation of endoplasmic reticulum unfolded protein response	1/32	30/18870	0.0496802664457122	0.1563420525528	0.112275564323251	HSPA5	1
GO:1901021	GO:1901021	positive regulation of calcium ion transmembrane transporter activity	1/32	30/18870	0.0496802664457122	0.1563420525528	0.112275564323251	CACNB2	1
GO:0031667	GO:0031667	response to nutrient levels	3/32	495/18870	0.0507424846486447	0.157890567698595	0.113387615809197	EP300/GIPR/HSPA5	3
GO:0002064	GO:0002064	epithelial cell development	2/32	214/18870	0.0508278748801562	0.157890567698595	0.113387615809197	BMP6/SLC9A4	2
GO:0016051	GO:0016051	carbohydrate biosynthetic process	2/32	214/18870	0.0508278748801562	0.157890567698595	0.113387615809197	EP300/DGKQ	2
GO:0022411	GO:0022411	cellular component disassembly	3/32	497/18870	0.0512454373213791	0.157890567698595	0.113387615809197	GAK/TMOD2/TMOD3	3
GO:0019886	GO:0019886	antigen processing and presentation of exogenous peptide antigen via MHC class II	1/32	31/18870	0.0512943976279699	0.157890567698595	0.113387615809197	DNM2	1
GO:0045762	GO:0045762	positive regulation of adenylate cyclase activity	1/32	31/18870	0.0512943976279699	0.157890567698595	0.113387615809197	GIPR	1
GO:0060325	GO:0060325	face morphogenesis	1/32	31/18870	0.0512943976279699	0.157890567698595	0.113387615809197	EP300	1
GO:0071805	GO:0071805	potassium ion transmembrane transport	2/32	217/18870	0.0521037758184106	0.159853633834653	0.114797373162583	TMEM175/SLC9A4	2
GO:0001958	GO:0001958	endochondral ossification	1/32	32/18870	0.0529058727209106	0.159853633834653	0.114797373162583	BMP6	1
GO:0006654	GO:0006654	phosphatidic acid biosynthetic process	1/32	32/18870	0.0529058727209106	0.159853633834653	0.114797373162583	DGKQ	1
GO:0036075	GO:0036075	replacement ossification	1/32	32/18870	0.0529058727209106	0.159853633834653	0.114797373162583	BMP6	1
GO:0061036	GO:0061036	positive regulation of cartilage development	1/32	32/18870	0.0529058727209106	0.159853633834653	0.114797373162583	BMP6	1
GO:0061037	GO:0061037	negative regulation of cartilage development	1/32	32/18870	0.0529058727209106	0.159853633834653	0.114797373162583	CHADL	1
GO:0006084	GO:0006084	acetyl-CoA metabolic process	1/32	33/18870	0.0545146959544242	0.161252178724047	0.115801724929265	ACSS2	1
GO:0030511	GO:0030511	positive regulation of transforming growth factor beta receptor signaling pathway	1/32	33/18870	0.0545146959544242	0.161252178724047	0.115801724929265	EP300	1
GO:0033198	GO:0033198	response to ATP	1/32	33/18870	0.0545146959544242	0.161252178724047	0.115801724929265	DGKQ	1
GO:0034968	GO:0034968	histone lysine methylation	1/32	33/18870	0.0545146959544242	0.161252178724047	0.115801724929265	AUTS2	1
GO:0043618	GO:0043618	regulation of transcription from RNA polymerase II promoter in response to stress	1/32	33/18870	0.0545146959544242	0.161252178724047	0.115801724929265	HSPA5	1
GO:0080111	GO:0080111	DNA demethylation	1/32	33/18870	0.0545146959544242	0.161252178724047	0.115801724929265	FTO	1
GO:1903846	GO:1903846	positive regulation of cellular response to transforming growth factor beta stimulus	1/32	33/18870	0.0545146959544242	0.161252178724047	0.115801724929265	EP300	1
GO:0006457	GO:0006457	protein folding	2/32	223/18870	0.0546901495484699	0.16128681827917	0.115826600997705	GAK/HSPA5	2
GO:0033157	GO:0033157	regulation of intracellular protein transport	2/32	226/18870	0.0560003392035493	0.162108675890355	0.116416810257354	EP300/RANGAP1	2
GO:0042180	GO:0042180	cellular ketone metabolic process	2/32	226/18870	0.0560003392035493	0.162108675890355	0.116416810257354	DGKQ/BMP6	2
GO:0006026	GO:0006026	aminoglycan catabolic process	1/32	34/18870	0.0561208715518895	0.162108675890355	0.116416810257354	IDUA	1
GO:0046825	GO:0046825	regulation of protein export from nucleus	1/32	34/18870	0.0561208715518895	0.162108675890355	0.116416810257354	RANGAP1	1
GO:0070528	GO:0070528	protein kinase C signaling	1/32	34/18870	0.0561208715518895	0.162108675890355	0.116416810257354	DGKQ	1
GO:0071353	GO:0071353	cellular response to interleukin-4	1/32	34/18870	0.0561208715518895	0.162108675890355	0.116416810257354	HSPA5	1
GO:0086019	GO:0086019	cell-cell signaling involved in cardiac conduction	1/32	34/18870	0.0561208715518895	0.162108675890355	0.116416810257354	CACNB2	1
GO:0007179	GO:0007179	transforming growth factor beta receptor signaling pathway	2/32	229/18870	0.0573216770611683	0.163857457274439	0.117672681045603	EP300/HSPA5	2
GO:0040029	GO:0040029	epigenetic regulation of gene expression	2/32	229/18870	0.0573216770611683	0.163857457274439	0.117672681045603	EP300/BAZ2A	2
GO:0002495	GO:0002495	antigen processing and presentation of peptide antigen via MHC class II	1/32	35/18870	0.0577244037301832	0.163857457274439	0.117672681045603	DNM2	1
GO:0015701	GO:0015701	bicarbonate transport	1/32	35/18870	0.0577244037301832	0.163857457274439	0.117672681045603	SLC26A1	1
GO:0070633	GO:0070633	transepithelial transport	1/32	35/18870	0.0577244037301832	0.163857457274439	0.117672681045603	SLC9A4	1
GO:1901385	GO:1901385	regulation of voltage-gated calcium channel activity	1/32	35/18870	0.0577244037301832	0.163857457274439	0.117672681045603	CACNB2	1
GO:0050730	GO:0050730	regulation of peptidyl-tyrosine phosphorylation	2/32	231/18870	0.05820869376276	0.164757365966433	0.118318941949712	DGKQ/BMP6	2
GO:0019318	GO:0019318	hexose metabolic process	2/32	233/18870	0.059100562548273	0.165539425635107	0.118880570693874	EP300/DGKQ	2
GO:0006516	GO:0006516	glycoprotein catabolic process	1/32	36/18870	0.0593252966996882	0.165539425635107	0.118880570693874	IDUA	1
GO:0046473	GO:0046473	phosphatidic acid metabolic process	1/32	36/18870	0.0593252966996882	0.165539425635107	0.118880570693874	DGKQ	1
GO:0070670	GO:0070670	response to interleukin-4	1/32	36/18870	0.0593252966996882	0.165539425635107	0.118880570693874	HSPA5	1
GO:1902745	GO:1902745	positive regulation of lamellipodium organization	1/32	36/18870	0.0593252966996882	0.165539425635107	0.118880570693874	AUTS2	1
GO:0006909	GO:0006909	phagocytosis	2/32	237/18870	0.0608986937750635	0.166693614845393	0.1197094407439	TMEM175/DNM2	2
GO:0051651	GO:0051651	maintenance of location in cell	2/32	237/18870	0.0608986937750635	0.166693614845393	0.1197094407439	RANGAP1/HSPA5	2
GO:0002504	GO:0002504	antigen processing and presentation of peptide or polysaccharide antigen via MHC class II	1/32	37/18870	0.0609235546643062	0.166693614845393	0.1197094407439	DNM2	1
GO:0035883	GO:0035883	enteroendocrine cell differentiation	1/32	37/18870	0.0609235546643062	0.166693614845393	0.1197094407439	BMP6	1
GO:0036260	GO:0036260	RNA capping	1/32	37/18870	0.0609235546643062	0.166693614845393	0.1197094407439	SNRPD2	1
GO:0060323	GO:0060323	head morphogenesis	1/32	37/18870	0.0609235546643062	0.166693614845393	0.1197094407439	EP300	1
GO:0097484	GO:0097484	dendrite extension	1/32	37/18870	0.0609235546643062	0.166693614845393	0.1197094407439	AUTS2	1
GO:0048588	GO:0048588	developmental cell growth	2/32	239/18870	0.0618048754290124	0.168324281680307	0.120880488687327	AUTS2/DNM2	2
GO:0035510	GO:0035510	DNA dealkylation	1/32	38/18870	0.0625191818214637	0.168324281680307	0.120880488687327	FTO	1
GO:0044273	GO:0044273	sulfur compound catabolic process	1/32	38/18870	0.0625191818214637	0.168324281680307	0.120880488687327	IDUA	1
GO:0045815	GO:0045815	transcription initiation-coupled chromatin remodeling	1/32	38/18870	0.0625191818214637	0.168324281680307	0.120880488687327	EP300	1
GO:0086091	GO:0086091	regulation of heart rate by cardiac conduction	1/32	38/18870	0.0625191818214637	0.168324281680307	0.120880488687327	CACNB2	1
GO:0006813	GO:0006813	potassium ion transport	2/32	241/18870	0.0627157475905307	0.168324281680307	0.120880488687327	TMEM175/SLC9A4	2
GO:0042445	GO:0042445	hormone metabolic process	2/32	241/18870	0.0627157475905307	0.168324281680307	0.120880488687327	DGKQ/BMP6	2
GO:0060560	GO:0060560	developmental growth involved in morphogenesis	2/32	244/18870	0.0640907633371726	0.169759407598634	0.121911110773478	AUTS2/DNM2	2
GO:0003016	GO:0003016	respiratory system process	1/32	39/18870	0.0641121823621238	0.169759407598634	0.121911110773478	FTO	1
GO:0031281	GO:0031281	positive regulation of cyclase activity	1/32	39/18870	0.0641121823621238	0.169759407598634	0.121911110773478	GIPR	1
GO:0043620	GO:0043620	regulation of DNA-templated transcription in response to stress	1/32	39/18870	0.0641121823621238	0.169759407598634	0.121911110773478	HSPA5	1
GO:0044060	GO:0044060	regulation of endocrine process	1/32	39/18870	0.0641121823621238	0.169759407598634	0.121911110773478	BMP6	1
GO:0002209	GO:0002209	behavioral defense response	1/32	40/18870	0.065702560470796	0.169860950298515	0.121984032701685	EP300	1
GO:0002478	GO:0002478	antigen processing and presentation of exogenous peptide antigen	1/32	40/18870	0.065702560470796	0.169860950298515	0.121984032701685	DNM2	1
GO:0010742	GO:0010742	macrophage derived foam cell differentiation	1/32	40/18870	0.065702560470796	0.169860950298515	0.121984032701685	EP300	1
GO:0032570	GO:0032570	response to progesterone	1/32	40/18870	0.065702560470796	0.169860950298515	0.121984032701685	GABRB1	1
GO:0042307	GO:0042307	positive regulation of protein import into nucleus	1/32	40/18870	0.065702560470796	0.169860950298515	0.121984032701685	EP300	1
GO:0048489	GO:0048489	synaptic vesicle transport	1/32	40/18870	0.065702560470796	0.169860950298515	0.121984032701685	DNM2	1
GO:0048821	GO:0048821	erythrocyte development	1/32	40/18870	0.065702560470796	0.169860950298515	0.121984032701685	TMOD3	1
GO:0051349	GO:0051349	positive regulation of lyase activity	1/32	40/18870	0.065702560470796	0.169860950298515	0.121984032701685	GIPR	1
GO:2000677	GO:2000677	regulation of transcription regulatory region DNA binding	1/32	40/18870	0.065702560470796	0.169860950298515	0.121984032701685	EP300	1
GO:0045444	GO:0045444	fat cell differentiation	2/32	248/18870	0.0659401638508131	0.170028956526311	0.122104684782988	FTO/EP300	2
GO:0045017	GO:0045017	glycerolipid biosynthetic process	2/32	250/18870	0.0668716525949837	0.17007433549803	0.122137273261743	DGKQ/SLC44A2	2
GO:0010591	GO:0010591	regulation of lamellipodium assembly	1/32	41/18870	0.0672903203255456	0.17007433549803	0.122137273261743	AUTS2	1
GO:0043388	GO:0043388	positive regulation of DNA binding	1/32	41/18870	0.0672903203255456	0.17007433549803	0.122137273261743	EP300	1
GO:0090077	GO:0090077	foam cell differentiation	1/32	41/18870	0.0672903203255456	0.17007433549803	0.122137273261743	EP300	1
GO:0090181	GO:0090181	regulation of cholesterol metabolic process	1/32	41/18870	0.0672903203255456	0.17007433549803	0.122137273261743	DGKQ	1
GO:0031669	GO:0031669	cellular response to nutrient levels	2/32	251/18870	0.0673390769992198	0.17007433549803	0.122137273261743	EP300/HSPA5	2
GO:0046883	GO:0046883	regulation of hormone secretion	2/32	251/18870	0.0673390769992198	0.17007433549803	0.122137273261743	GIPR/BMP6	2
GO:1901617	GO:1901617	organic hydroxy compound biosynthetic process	2/32	251/18870	0.0673390769992198	0.17007433549803	0.122137273261743	DGKQ/BMP6	2
GO:0008654	GO:0008654	phospholipid biosynthetic process	2/32	254/18870	0.0687480121180822	0.172188665245005	0.12365565914469	DGKQ/SLC44A2	2
GO:0016601	GO:0016601	Rac protein signal transduction	1/32	42/18870	0.0688754660980021	0.172188665245005	0.12365565914469	AUTS2	1
GO:0140467	GO:0140467	integrated stress response signaling	1/32	42/18870	0.0688754660980021	0.172188665245005	0.12365565914469	HSPA5	1
GO:1901983	GO:1901983	regulation of protein acetylation	1/32	42/18870	0.0688754660980021	0.172188665245005	0.12365565914469	AUTS2	1
GO:0046717	GO:0046717	acid secretion	1/32	43/18870	0.0704580019533702	0.17525538364664	0.125857993919896	SLC9A4	1
GO:0090317	GO:0090317	negative regulation of intracellular protein transport	1/32	43/18870	0.0704580019533702	0.17525538364664	0.125857993919896	RANGAP1	1
GO:0006898	GO:0006898	receptor-mediated endocytosis	2/32	258/18870	0.0706419567345141	0.175270346054147	0.125868739031137	DNM2/GAK	2
GO:0021587	GO:0021587	cerebellum morphogenesis	1/32	44/18870	0.0720379320504377	0.17607286121509	0.126445057693337	HSPA5	1
GO:0021762	GO:0021762	substantia nigra development	1/32	44/18870	0.0720379320504377	0.17607286121509	0.126445057693337	HSPA5	1
GO:0030501	GO:0030501	positive regulation of bone mineralization	1/32	44/18870	0.0720379320504377	0.17607286121509	0.126445057693337	BMP6	1
GO:0042771	GO:0042771	intrinsic apoptotic signaling pathway in response to DNA damage by p53 class mediator	1/32	44/18870	0.0720379320504377	0.17607286121509	0.126445057693337	EP300	1
GO:0045761	GO:0045761	regulation of adenylate cyclase activity	1/32	44/18870	0.0720379320504377	0.17607286121509	0.126445057693337	GIPR	1
GO:1903573	GO:1903573	negative regulation of response to endoplasmic reticulum stress	1/32	44/18870	0.0720379320504377	0.17607286121509	0.126445057693337	HSPA5	1
GO:0010799	GO:0010799	regulation of peptidyl-threonine phosphorylation	1/32	45/18870	0.073615260541587	0.179482751567978	0.12889383815515	DGKQ	1
GO:0071216	GO:0071216	cellular response to biotic stimulus	2/32	265/18870	0.0739977540916871	0.17996984637114	0.12924364067476	BMP6/HSPA5	2
GO:0050708	GO:0050708	regulation of protein secretion	2/32	266/18870	0.0744813787390438	0.180699896694478	0.129767919400149	GIPR/BMP6	2
GO:0006984	GO:0006984	ER-nucleus signaling pathway	1/32	46/18870	0.0751899915728048	0.181320617132933	0.130213683904174	HSPA5	1
GO:0140718	GO:0140718	facultative heterochromatin formation	1/32	46/18870	0.0751899915728048	0.181320617132933	0.130213683904174	BAZ2A	1
GO:0021575	GO:0021575	hindbrain morphogenesis	1/32	47/18870	0.0767621292836885	0.181320617132933	0.130213683904174	HSPA5	1
GO:0035196	GO:0035196	miRNA processing	1/32	47/18870	0.0767621292836885	0.181320617132933	0.130213683904174	ZC3H7B	1
GO:0035384	GO:0035384	thioester biosynthetic process	1/32	47/18870	0.0767621292836885	0.181320617132933	0.130213683904174	ACSS2	1
GO:0045047	GO:0045047	protein targeting to ER	1/32	47/18870	0.0767621292836885	0.181320617132933	0.130213683904174	HSPA5	1
GO:0045601	GO:0045601	regulation of endothelial cell differentiation	1/32	47/18870	0.0767621292836885	0.181320617132933	0.130213683904174	BMP6	1
GO:0048806	GO:0048806	genitalia development	1/32	47/18870	0.0767621292836885	0.181320617132933	0.130213683904174	BMP6	1
GO:0071616	GO:0071616	acyl-CoA biosynthetic process	1/32	47/18870	0.0767621292836885	0.181320617132933	0.130213683904174	ACSS2	1
GO:0072583	GO:0072583	clathrin-dependent endocytosis	1/32	47/18870	0.0767621292836885	0.181320617132933	0.130213683904174	GAK	1
GO:0140353	GO:0140353	lipid export from cell	1/32	47/18870	0.0767621292836885	0.181320617132933	0.130213683904174	BMP6	1
GO:0110053	GO:0110053	regulation of actin filament organization	2/32	273/18870	0.0778956722356704	0.183270077530514	0.131613670425333	TMOD2/TMOD3	2
GO:0006356	GO:0006356	regulation of transcription by RNA polymerase I	1/32	48/18870	0.0783316778074584	0.183270077530514	0.131613670425333	BAZ2A	1
GO:0044331	GO:0044331	cell-cell adhesion mediated by cadherin	1/32	48/18870	0.0783316778074584	0.183270077530514	0.131613670425333	BMP6	1
GO:0070509	GO:0070509	calcium ion import	1/32	48/18870	0.0783316778074584	0.183270077530514	0.131613670425333	CACNB2	1
GO:0018108	GO:0018108	peptidyl-tyrosine phosphorylation	2/32	276/18870	0.0793741801851476	0.184309512065346	0.132360130492025	DGKQ/BMP6	2
GO:0010171	GO:0010171	body morphogenesis	1/32	49/18870	0.0798986412709671	0.184309512065346	0.132360130492025	EP300	1
GO:0019884	GO:0019884	antigen processing and presentation of exogenous antigen	1/32	49/18870	0.0798986412709671	0.184309512065346	0.132360130492025	DNM2	1
GO:0031648	GO:0031648	protein destabilization	1/32	49/18870	0.0798986412709671	0.184309512065346	0.132360130492025	EP300	1
GO:0046427	GO:0046427	positive regulation of receptor signaling pathway via JAK-STAT	1/32	49/18870	0.0798986412709671	0.184309512065346	0.132360130492025	EP300	1
GO:2001259	GO:2001259	positive regulation of cation channel activity	1/32	49/18870	0.0798986412709671	0.184309512065346	0.132360130492025	CACNB2	1
GO:0018212	GO:0018212	peptidyl-tyrosine modification	2/32	278/18870	0.0803648403000267	0.184951793681136	0.132821378951348	DGKQ/BMP6	2
GO:0006305	GO:0006305	DNA alkylation	1/32	50/18870	0.0814630237947082	0.18531426890944	0.133081687103547	BAZ2A	1
GO:0006306	GO:0006306	DNA methylation	1/32	50/18870	0.0814630237947082	0.18531426890944	0.133081687103547	BAZ2A	1
GO:0030521	GO:0030521	androgen receptor signaling pathway	1/32	50/18870	0.0814630237947082	0.18531426890944	0.133081687103547	EP300	1
GO:0042149	GO:0042149	cellular response to glucose starvation	1/32	50/18870	0.0814630237947082	0.18531426890944	0.133081687103547	HSPA5	1
GO:0043114	GO:0043114	regulation of vascular permeability	1/32	50/18870	0.0814630237947082	0.18531426890944	0.133081687103547	BMP6	1
GO:0031668	GO:0031668	cellular response to extracellular stimulus	2/32	281/18870	0.0818582219533367	0.185784213419439	0.133419173302552	EP300/HSPA5	2
GO:0019083	GO:0019083	viral transcription	1/32	51/18870	0.0830248294928253	0.186968407531686	0.134269591088745	EP300	1
GO:0021695	GO:0021695	cerebellar cortex development	1/32	51/18870	0.0830248294928253	0.186968407531686	0.134269591088745	HSPA5	1
GO:0072599	GO:0072599	establishment of protein localization to endoplasmic reticulum	1/32	51/18870	0.0830248294928253	0.186968407531686	0.134269591088745	HSPA5	1
GO:0051258	GO:0051258	protein polymerization	2/32	286/18870	0.084366602036602	0.186968407531686	0.134269591088745	TMOD2/TMOD3	2
GO:0000387	GO:0000387	spliceosomal snRNP assembly	1/32	52/18870	0.0845840624731234	0.186968407531686	0.134269591088745	SNRPD2	1
GO:0006110	GO:0006110	regulation of glycolytic process	1/32	52/18870	0.0845840624731234	0.186968407531686	0.134269591088745	EP300	1
GO:0007528	GO:0007528	neuromuscular junction development	1/32	52/18870	0.0845840624731234	0.186968407531686	0.134269591088745	CACNB2	1
GO:0035176	GO:0035176	social behavior	1/32	52/18870	0.0845840624731234	0.186968407531686	0.134269591088745	NRXN3	1
GO:0046365	GO:0046365	monosaccharide catabolic process	1/32	52/18870	0.0845840624731234	0.186968407531686	0.134269591088745	IDUA	1
GO:0060324	GO:0060324	face development	1/32	52/18870	0.0845840624731234	0.186968407531686	0.134269591088745	EP300	1
GO:1904263	GO:1904263	positive regulation of TORC1 signaling	1/32	52/18870	0.0845840624731234	0.186968407531686	0.134269591088745	EP300	1
GO:0071560	GO:0071560	cellular response to transforming growth factor beta stimulus	2/32	287/18870	0.0848711494444453	0.186968407531686	0.134269591088745	EP300/HSPA5	2
GO:1903532	GO:1903532	positive regulation of secretion by cell	2/32	288/18870	0.08537664362545	0.186968407531686	0.134269591088745	GIPR/BMP6	2
GO:0018022	GO:0018022	peptidyl-lysine methylation	1/32	53/18870	0.086140726837076	0.186968407531686	0.134269591088745	AUTS2	1
GO:0045778	GO:0045778	positive regulation of ossification	1/32	53/18870	0.086140726837076	0.186968407531686	0.134269591088745	BMP6	1
GO:0060390	GO:0060390	regulation of SMAD protein signal transduction	1/32	53/18870	0.086140726837076	0.186968407531686	0.134269591088745	BMP6	1
GO:0086002	GO:0086002	cardiac muscle cell action potential involved in contraction	1/32	53/18870	0.086140726837076	0.186968407531686	0.134269591088745	CACNB2	1
GO:1902743	GO:1902743	regulation of lamellipodium organization	1/32	53/18870	0.086140726837076	0.186968407531686	0.134269591088745	AUTS2	1
GO:1904894	GO:1904894	positive regulation of receptor signaling pathway via STAT	1/32	53/18870	0.086140726837076	0.186968407531686	0.134269591088745	EP300	1
GO:0072659	GO:0072659	protein localization to plasma membrane	2/32	290/18870	0.0863904546546163	0.186968407531686	0.134269591088745	CACNB2/GAK	2
GO:0010883	GO:0010883	regulation of lipid storage	1/32	54/18870	0.0876948266798364	0.186968407531686	0.134269591088745	FTO	1
GO:0031279	GO:0031279	regulation of cyclase activity	1/32	54/18870	0.0876948266798364	0.186968407531686	0.134269591088745	GIPR	1
GO:0045744	GO:0045744	negative regulation of G protein-coupled receptor signaling pathway	1/32	54/18870	0.0876948266798364	0.186968407531686	0.134269591088745	GIPR	1
GO:0050873	GO:0050873	brown fat cell differentiation	1/32	54/18870	0.0876948266798364	0.186968407531686	0.134269591088745	FTO	1
GO:0051703	GO:0051703	biological process involved in intraspecies interaction between organisms	1/32	54/18870	0.0876948266798364	0.186968407531686	0.134269591088745	NRXN3	1
GO:0070169	GO:0070169	positive regulation of biomineral tissue development	1/32	54/18870	0.0876948266798364	0.186968407531686	0.134269591088745	BMP6	1
GO:0072348	GO:0072348	sulfur compound transport	1/32	54/18870	0.0876948266798364	0.186968407531686	0.134269591088745	SLC26A1	1
GO:0097479	GO:0097479	synaptic vesicle localization	1/32	54/18870	0.0876948266798364	0.186968407531686	0.134269591088745	DNM2	1
GO:0071559	GO:0071559	response to transforming growth factor beta	2/32	293/18870	0.0879181619687401	0.187039718227233	0.134320802189368	EP300/HSPA5	2
GO:0048193	GO:0048193	Golgi vesicle transport	2/32	294/18870	0.0884292444522642	0.187721564192845	0.1348104634118	DNM2/GAK	2
GO:0045071	GO:0045071	negative regulation of viral genome replication	1/32	55/18870	0.0892463660902444	0.188239123338096	0.135182143610153	ILF3	1
GO:0065002	GO:0065002	intracellular protein transmembrane transport	1/32	55/18870	0.0892463660902444	0.188239123338096	0.135182143610153	HSPA5	1
GO:0070988	GO:0070988	demethylation	1/32	55/18870	0.0892463660902444	0.188239123338096	0.135182143610153	FTO	1
GO:0048511	GO:0048511	rhythmic process	2/32	296/18870	0.0894541533831895	0.18827423308214	0.135207357340313	EP300/GABRB1	2
GO:0006650	GO:0006650	glycerophospholipid metabolic process	2/32	298/18870	0.090482692077797	0.189477582444021	0.136071531287611	DGKQ/SLC44A2	2
GO:0045912	GO:0045912	negative regulation of carbohydrate metabolic process	1/32	56/18870	0.0907953491508404	0.189477582444021	0.136071531287611	EP300	1
GO:0060986	GO:0060986	endocrine hormone secretion	1/32	56/18870	0.0907953491508404	0.189477582444021	0.136071531287611	BMP6	1
GO:0070542	GO:0070542	response to fatty acid	1/32	56/18870	0.0907953491508404	0.189477582444021	0.136071531287611	GIPR	1
GO:0034332	GO:0034332	adherens junction organization	1/32	57/18870	0.0923417799378702	0.19186177921883	0.137783719620683	BMP6	1
GO:0060612	GO:0060612	adipose tissue development	1/32	57/18870	0.0923417799378702	0.19186177921883	0.137783719620683	FTO	1
GO:0006749	GO:0006749	glutathione metabolic process	1/32	58/18870	0.0938856625212957	0.19186177921883	0.137783719620683	GSS	1
GO:0031663	GO:0031663	lipopolysaccharide-mediated signaling pathway	1/32	58/18870	0.0938856625212957	0.19186177921883	0.137783719620683	BMP6	1
GO:0033866	GO:0033866	nucleoside bisphosphate biosynthetic process	1/32	58/18870	0.0938856625212957	0.19186177921883	0.137783719620683	ACSS2	1
GO:0034030	GO:0034030	ribonucleoside bisphosphate biosynthetic process	1/32	58/18870	0.0938856625212957	0.19186177921883	0.137783719620683	ACSS2	1
GO:0034033	GO:0034033	purine nucleoside bisphosphate biosynthetic process	1/32	58/18870	0.0938856625212957	0.19186177921883	0.137783719620683	ACSS2	1
GO:0042306	GO:0042306	regulation of protein import into nucleus	1/32	58/18870	0.0938856625212957	0.19186177921883	0.137783719620683	EP300	1
GO:0051339	GO:0051339	regulation of lyase activity	1/32	58/18870	0.0938856625212957	0.19186177921883	0.137783719620683	GIPR	1
GO:0086065	GO:0086065	cell communication involved in cardiac conduction	1/32	58/18870	0.0938856625212957	0.19186177921883	0.137783719620683	CACNB2	1
GO:0051146	GO:0051146	striated muscle cell differentiation	2/32	305/18870	0.094110665861945	0.191923407606658	0.137827977463718	TMOD2/TMOD3	2
GO:0006826	GO:0006826	iron ion transport	1/32	59/18870	0.0954270009648062	0.192726896421565	0.138404995346291	DNM2	1
GO:0046579	GO:0046579	positive regulation of Ras protein signal transduction	1/32	59/18870	0.0954270009648062	0.192726896421565	0.138404995346291	AUTS2	1
GO:0046686	GO:0046686	response to cadmium ion	1/32	59/18870	0.0954270009648062	0.192726896421565	0.138404995346291	GSS	1
GO:0051480	GO:0051480	regulation of cytosolic calcium ion concentration	1/32	59/18870	0.0954270009648062	0.192726896421565	0.138404995346291	CACNB2	1
GO:0015850	GO:0015850	organic hydroxy compound transport	2/32	308/18870	0.0956786318275585	0.192726896421565	0.138404995346291	BMP6/SLC44A2	2
GO:0046879	GO:0046879	hormone secretion	2/32	308/18870	0.0956786318275585	0.192726896421565	0.138404995346291	GIPR/BMP6	2
GO:0019932	GO:0019932	second-messenger-mediated signaling	2/32	310/18870	0.0967282314803938	0.193653065057292	0.139070114580284	GIPR/DGKQ	2
GO:0034504	GO:0034504	protein localization to nucleus	2/32	310/18870	0.0967282314803938	0.193653065057292	0.139070114580284	EP300/RANGAP1	2
GO:0051047	GO:0051047	positive regulation of secretion	2/32	310/18870	0.0967282314803938	0.193653065057292	0.139070114580284	GIPR/BMP6	2
GO:0032387	GO:0032387	negative regulation of intracellular transport	1/32	60/18870	0.0969657993258251	0.19373491346032	0.139128893235731	RANGAP1	1
GO:0006611	GO:0006611	protein export from nucleus	1/32	61/18870	0.0985020616555206	0.195613973247354	0.140478322225191	RANGAP1	1
GO:0019755	GO:0019755	one-carbon compound transport	1/32	61/18870	0.0985020616555206	0.195613973247354	0.140478322225191	SLC26A1	1
GO:0060350	GO:0060350	endochondral bone morphogenesis	1/32	61/18870	0.0985020616555206	0.195613973247354	0.140478322225191	BMP6	1
GO:0015695	GO:0015695	organic cation transport	1/32	62/18870	0.100035791998815	0.197448904811483	0.141796060949309	SLC44A2	1
GO:0046824	GO:0046824	positive regulation of nucleocytoplasmic transport	1/32	62/18870	0.100035791998815	0.197448904811483	0.141796060949309	EP300	1
GO:1903053	GO:1903053	regulation of extracellular matrix organization	1/32	62/18870	0.100035791998815	0.197448904811483	0.141796060949309	CHADL	1
GO:0006790	GO:0006790	sulfur compound metabolic process	2/32	317/18870	0.100428326203607	0.197448904811483	0.141796060949309	IDUA/ACSS2	2
GO:0017148	GO:0017148	negative regulation of translation	2/32	317/18870	0.100428326203607	0.197448904811483	0.141796060949309	FTO/ILF3	2
GO:0009914	GO:0009914	hormone transport	2/32	319/18870	0.101492930192054	0.19849898706047	0.142550167571078	GIPR/BMP6	2
GO:0040014	GO:0040014	regulation of multicellular organism growth	1/32	63/18870	0.101566994394393	0.19849898706047	0.142550167571078	FTO	1
GO:0043470	GO:0043470	regulation of carbohydrate catabolic process	1/32	63/18870	0.101566994394393	0.19849898706047	0.142550167571078	EP300	1
GO:0044403	GO:0044403	biological process involved in symbiotic interaction	2/32	322/18870	0.103095908542364	0.201088059236097	0.144409485232869	EP300/ILF3	2
GO:0030199	GO:0030199	collagen fibril organization	1/32	65/18870	0.104621831466015	0.203661075087005	0.146257272197133	CHADL	1
GO:0008202	GO:0008202	steroid metabolic process	2/32	327/18870	0.105783462490071	0.204948093470565	0.14718153225992	DGKQ/BMP6	2
GO:0001756	GO:0001756	somitogenesis	1/32	66/18870	0.106145474188327	0.204948093470565	0.14718153225992	EP300	1
GO:0030219	GO:0030219	megakaryocyte differentiation	1/32	66/18870	0.106145474188327	0.204948093470565	0.14718153225992	EP300	1
GO:0034605	GO:0034605	cellular response to heat	1/32	66/18870	0.106145474188327	0.204948093470565	0.14718153225992	EP300	1
GO:0048638	GO:0048638	regulation of developmental growth	2/32	328/18870	0.106323325648182	0.204948093470565	0.14718153225992	FTO/DNM2	2
GO:0006913	GO:0006913	nucleocytoplasmic transport	2/32	330/18870	0.107405372443878	0.205526368177615	0.147596814763941	EP300/RANGAP1	2
GO:0051169	GO:0051169	nuclear transport	2/32	330/18870	0.107405372443878	0.205526368177615	0.147596814763941	EP300/RANGAP1	2
GO:0048857	GO:0048857	neural nucleus development	1/32	67/18870	0.107666605055482	0.205526368177615	0.147596814763941	HSPA5	1
GO:0051057	GO:0051057	positive regulation of small GTPase mediated signal transduction	1/32	67/18870	0.107666605055482	0.205526368177615	0.147596814763941	AUTS2	1
GO:0071806	GO:0071806	protein transmembrane transport	1/32	67/18870	0.107666605055482	0.205526368177615	0.147596814763941	HSPA5	1
GO:0016925	GO:0016925	protein sumoylation	1/32	68/18870	0.109185228075118	0.207967163126147	0.149349648539429	RANGAP1	1
GO:0071214	GO:0071214	cellular response to abiotic stimulus	2/32	334/18870	0.109578637220782	0.207967163126147	0.149349648539429	EP300/BMP6	2
GO:0104004	GO:0104004	cellular response to environmental stimulus	2/32	334/18870	0.109578637220782	0.207967163126147	0.149349648539429	EP300/BMP6	2
GO:0032386	GO:0032386	regulation of intracellular transport	2/32	336/18870	0.110669792301003	0.208491065085975	0.149725883769997	EP300/RANGAP1	2
GO:0032008	GO:0032008	positive regulation of TOR signaling	1/32	69/18870	0.110701347248695	0.208491065085975	0.149725883769997	EP300	1
GO:0043627	GO:0043627	response to estrogen	1/32	69/18870	0.110701347248695	0.208491065085975	0.149725883769997	EP300	1
GO:1901224	GO:1901224	positive regulation of non-canonical NF-kappaB signal transduction	1/32	69/18870	0.110701347248695	0.208491065085975	0.149725883769997	EP300	1
GO:0032956	GO:0032956	regulation of actin cytoskeleton organization	2/32	337/18870	0.111216486836075	0.209061525827355	0.150135554748579	TMOD2/TMOD3	2
GO:0006081	GO:0006081	cellular aldehyde metabolic process	1/32	70/18870	0.112214966571499	0.210136391773625	0.150907459547824	BMP6	1
GO:0009311	GO:0009311	oligosaccharide metabolic process	1/32	70/18870	0.112214966571499	0.210136391773625	0.150907459547824	IDUA	1
GO:0042698	GO:0042698	ovulation cycle	1/32	71/18870	0.113726090032654	0.212159467201069	0.15236031200547	GABRB1	1
GO:0048002	GO:0048002	antigen processing and presentation of peptide antigen	1/32	71/18870	0.113726090032654	0.212159467201069	0.15236031200547	DNM2	1
GO:0019216	GO:0019216	regulation of lipid metabolic process	2/32	342/18870	0.113960974377466	0.212195765145187	0.15238637903026	DGKQ/BMP6	2
GO:0006360	GO:0006360	transcription by RNA polymerase I	1/32	72/18870	0.11523472161513	0.212558428447383	0.152646822245943	BAZ2A	1
GO:0014823	GO:0014823	response to activity	1/32	72/18870	0.11523472161513	0.212558428447383	0.152646822245943	BMP6	1
GO:0030032	GO:0030032	lamellipodium assembly	1/32	72/18870	0.11523472161513	0.212558428447383	0.152646822245943	AUTS2	1
GO:0030858	GO:0030858	positive regulation of epithelial cell differentiation	1/32	72/18870	0.11523472161513	0.212558428447383	0.152646822245943	BMP6	1
GO:0071260	GO:0071260	cellular response to mechanical stimulus	1/32	72/18870	0.11523472161513	0.212558428447383	0.152646822245943	BMP6	1
GO:0034249	GO:0034249	negative regulation of amide metabolic process	2/32	345/18870	0.115616340233261	0.212863729214509	0.152866071100347	FTO/ILF3	2
GO:0006879	GO:0006879	intracellular iron ion homeostasis	1/32	73/18870	0.116740865295751	0.213735599100957	0.153492196201809	BMP6	1
GO:0033143	GO:0033143	regulation of intracellular steroid hormone receptor signaling pathway	1/32	73/18870	0.116740865295751	0.213735599100957	0.153492196201809	EP300	1
GO:0140962	GO:0140962	multicellular organismal-level chemical homeostasis	1/32	73/18870	0.116740865295751	0.213735599100957	0.153492196201809	BMP6	1
GO:0007585	GO:0007585	respiratory gaseous exchange by respiratory system	1/32	74/18870	0.118244525045207	0.215686772536165	0.154893412924716	FTO	1
GO:0045669	GO:0045669	positive regulation of osteoblast differentiation	1/32	74/18870	0.118244525045207	0.215686772536165	0.154893412924716	BMP6	1
GO:0030968	GO:0030968	endoplasmic reticulum unfolded protein response	1/32	75/18870	0.119745704828063	0.218021292524292	0.156569926343921	HSPA5	1
GO:1990778	GO:1990778	protein localization to cell periphery	2/32	353/18870	0.120061558303893	0.218193053375156	0.15669327477222	CACNB2/GAK	2
GO:0031346	GO:0031346	positive regulation of cell projection organization	2/32	355/18870	0.121179724668414	0.218728466069089	0.157077776327467	AUTS2/EP300	2
GO:0046470	GO:0046470	phosphatidylcholine metabolic process	1/32	76/18870	0.121244408602764	0.218728466069089	0.157077776327467	SLC44A2	1
GO:0086001	GO:0086001	cardiac muscle cell action potential	1/32	76/18870	0.121244408602764	0.218728466069089	0.157077776327467	CACNB2	1
GO:0086003	GO:0086003	cardiac muscle cell contraction	1/32	76/18870	0.121244408602764	0.218728466069089	0.157077776327467	CACNB2	1
GO:0090287	GO:0090287	regulation of cellular response to growth factor stimulus	2/32	357/18870	0.12230057620336	0.220230470859799	0.15815642684241	EP300/HSPA5	2
GO:0010639	GO:0010639	negative regulation of organelle organization	2/32	363/18870	0.12567894755188	0.22557343865259	0.161993428559487	TMOD2/TMOD3	2
GO:0070972	GO:0070972	protein localization to endoplasmic reticulum	1/32	79/18870	0.125725703370834	0.22557343865259	0.161993428559487	HSPA5	1
GO:0051899	GO:0051899	membrane depolarization	1/32	80/18870	0.127214542575354	0.227706346447722	0.163525156091765	CACNB2	1
GO:1902074	GO:1902074	response to salt	2/32	366/18870	0.127376849637254	0.227706346447722	0.163525156091765	GIPR/DGKQ	2
GO:0009306	GO:0009306	protein secretion	2/32	368/18870	0.12851194638737	0.228676665689857	0.164221981665599	GIPR/BMP6	2
GO:0030500	GO:0030500	regulation of bone mineralization	1/32	81/18870	0.128700925472512	0.228676665689857	0.164221981665599	BMP6	1
GO:1901019	GO:1901019	regulation of calcium ion transmembrane transporter activity	1/32	81/18870	0.128700925472512	0.228676665689857	0.164221981665599	CACNB2	1
GO:0002833	GO:0002833	positive regulation of response to biotic stimulus	2/32	369/18870	0.129080432612752	0.228676665689857	0.164221981665599	EP300/BMP6	2
GO:0035592	GO:0035592	establishment of protein localization to extracellular region	2/32	369/18870	0.129080432612752	0.228676665689857	0.164221981665599	GIPR/BMP6	2
GO:0070897	GO:0070897	transcription preinitiation complex assembly	1/32	82/18870	0.130184855984241	0.229806600617342	0.165033433732144	BAZ2A	1
GO:1905897	GO:1905897	regulation of response to endoplasmic reticulum stress	1/32	82/18870	0.130184855984241	0.229806600617342	0.165033433732144	HSPA5	1
GO:0006644	GO:0006644	phospholipid metabolic process	2/32	375/18870	0.13250425577591	0.232127368298691	0.166700071062485	DGKQ/SLC44A2	2
GO:0032024	GO:0032024	positive regulation of insulin secretion	1/32	84/18870	0.133145375508892	0.232127368298691	0.166700071062485	GIPR	1
GO:0060395	GO:0060395	SMAD protein signal transduction	1/32	84/18870	0.133145375508892	0.232127368298691	0.166700071062485	BMP6	1
GO:0072332	GO:0072332	intrinsic apoptotic signaling pathway by p53 class mediator	1/32	84/18870	0.133145375508892	0.232127368298691	0.166700071062485	EP300	1
GO:1904427	GO:1904427	positive regulation of calcium ion transmembrane transport	1/32	84/18870	0.133145375508892	0.232127368298691	0.166700071062485	CACNB2	1
GO:0071692	GO:0071692	protein localization to extracellular region	2/32	377/18870	0.133650361924589	0.232127368298691	0.166700071062485	GIPR/BMP6	2
GO:0030433	GO:0030433	ubiquitin-dependent ERAD pathway	1/32	85/18870	0.13462197233545	0.232127368298691	0.166700071062485	HSPA5	1
GO:0032414	GO:0032414	positive regulation of ion transmembrane transporter activity	1/32	85/18870	0.13462197233545	0.232127368298691	0.166700071062485	CACNB2	1
GO:0045069	GO:0045069	regulation of viral genome replication	1/32	85/18870	0.13462197233545	0.232127368298691	0.166700071062485	ILF3	1
GO:0051101	GO:0051101	regulation of DNA binding	1/32	85/18870	0.13462197233545	0.232127368298691	0.166700071062485	EP300	1
GO:0051591	GO:0051591	response to cAMP	1/32	85/18870	0.13462197233545	0.232127368298691	0.166700071062485	DGKQ	1
GO:0061053	GO:0061053	somite development	1/32	85/18870	0.13462197233545	0.232127368298691	0.166700071062485	EP300	1
GO:0071230	GO:0071230	cellular response to amino acid stimulus	1/32	85/18870	0.13462197233545	0.232127368298691	0.166700071062485	EP300	1
GO:0032970	GO:0032970	regulation of actin filament-based process	2/32	379/18870	0.13479883722523	0.232127368298691	0.166700071062485	TMOD2/TMOD3	2
GO:0032370	GO:0032370	positive regulation of lipid transport	1/32	86/18870	0.136096132403869	0.233544756825455	0.167717955208876	BMP6	1
GO:0070918	GO:0070918	regulatory ncRNA processing	1/32	86/18870	0.136096132403869	0.233544756825455	0.167717955208876	ZC3H7B	1
GO:0051851	GO:0051851	modulation by host of symbiont process	1/32	87/18870	0.137567859605907	0.235659724716206	0.169236799368731	EP300	1
GO:0006096	GO:0006096	glycolytic process	1/32	89/18870	0.140504030947826	0.239440260352263	0.171951755230266	EP300	1
GO:0021954	GO:0021954	central nervous system neuron development	1/32	89/18870	0.140504030947826	0.239440260352263	0.171951755230266	GABRB1	1
GO:0034620	GO:0034620	cellular response to unfolded protein	1/32	89/18870	0.140504030947826	0.239440260352263	0.171951755230266	HSPA5	1
GO:0046486	GO:0046486	glycerolipid metabolic process	2/32	390/18870	0.141156564726561	0.239860987304619	0.172253896306389	DGKQ/SLC44A2	2
GO:0006029	GO:0006029	proteoglycan metabolic process	1/32	90/18870	0.141968482841211	0.239860987304619	0.172253896306389	IDUA	1
GO:0010507	GO:0010507	negative regulation of autophagy	1/32	90/18870	0.141968482841211	0.239860987304619	0.172253896306389	EP300	1
GO:0034644	GO:0034644	cellular response to UV	1/32	90/18870	0.141968482841211	0.239860987304619	0.172253896306389	EP300	1
GO:0046889	GO:0046889	positive regulation of lipid biosynthetic process	1/32	90/18870	0.141968482841211	0.239860987304619	0.172253896306389	BMP6	1
GO:0002220	GO:0002220	innate immune response activating cell surface receptor signaling pathway	1/32	91/18870	0.143430517375241	0.240679828985711	0.172841939704406	EP300	1
GO:0030901	GO:0030901	midbrain development	1/32	91/18870	0.143430517375241	0.240679828985711	0.172841939704406	HSPA5	1
GO:0031507	GO:0031507	heterochromatin formation	1/32	91/18870	0.143430517375241	0.240679828985711	0.172841939704406	BAZ2A	1
GO:0097581	GO:0097581	lamellipodium organization	1/32	91/18870	0.143430517375241	0.240679828985711	0.172841939704406	AUTS2	1
GO:0030516	GO:0030516	regulation of axon extension	1/32	92/18870	0.144890138411717	0.241892858195833	0.17371306514304	DNM2	1
GO:0050886	GO:0050886	endocrine process	1/32	92/18870	0.144890138411717	0.241892858195833	0.17371306514304	BMP6	1
GO:1903510	GO:1903510	mucopolysaccharide metabolic process	1/32	92/18870	0.144890138411717	0.241892858195833	0.17371306514304	IDUA	1
GO:0001510	GO:0001510	RNA methylation	1/32	93/18870	0.146347349806478	0.243089611398619	0.174572502121156	SNRPD2	1
GO:0048525	GO:0048525	negative regulation of viral process	1/32	93/18870	0.146347349806478	0.243089611398619	0.174572502121156	ILF3	1
GO:1900182	GO:1900182	positive regulation of protein localization to nucleus	1/32	93/18870	0.146347349806478	0.243089611398619	0.174572502121156	EP300	1
GO:0019915	GO:0019915	lipid storage	1/32	94/18870	0.147802155409407	0.244270340735346	0.175420431711624	FTO	1
GO:0032411	GO:0032411	positive regulation of transporter activity	1/32	94/18870	0.147802155409407	0.244270340735346	0.175420431711624	CACNB2	1
GO:0071229	GO:0071229	cellular response to acid chemical	1/32	94/18870	0.147802155409407	0.244270340735346	0.175420431711624	EP300	1
GO:0000245	GO:0000245	spliceosomal complex assembly	1/32	95/18870	0.14925455906444	0.246257522074495	0.176847507169715	SNRPD2	1
GO:0006637	GO:0006637	acyl-CoA metabolic process	1/32	96/18870	0.150704564609577	0.247406660234055	0.177672749855501	ACSS2	1
GO:0035383	GO:0035383	thioester metabolic process	1/32	96/18870	0.150704564609577	0.247406660234055	0.177672749855501	ACSS2	1
GO:0045666	GO:0045666	positive regulation of neuron differentiation	1/32	96/18870	0.150704564609577	0.247406660234055	0.177672749855501	BMP6	1
GO:0140694	GO:0140694	non-membrane-bounded organelle assembly	2/32	408/18870	0.151701084102236	0.248628232680038	0.178550010538055	TMOD2/TMOD3	2
GO:0061337	GO:0061337	cardiac conduction	1/32	97/18870	0.152152175876887	0.248953311027798	0.178783462474678	CACNB2	1
GO:0006835	GO:0006835	dicarboxylic acid transport	1/32	98/18870	0.153597396692523	0.250485820765125	0.179884019828121	SLC26A1	1
GO:1901992	GO:1901992	positive regulation of mitotic cell cycle phase transition	1/32	98/18870	0.153597396692523	0.250485820765125	0.179884019828121	TMOD3	1
GO:0000041	GO:0000041	transition metal ion transport	1/32	100/18870	0.156480682243832	0.253092729080746	0.181756146344923	DNM2	1
GO:0007029	GO:0007029	endoplasmic reticulum organization	1/32	100/18870	0.156480682243832	0.253092729080746	0.181756146344923	GAK	1
GO:0018107	GO:0018107	peptidyl-threonine phosphorylation	1/32	100/18870	0.156480682243832	0.253092729080746	0.181756146344923	DGKQ	1
GO:0060349	GO:0060349	bone morphogenesis	1/32	100/18870	0.156480682243832	0.253092729080746	0.181756146344923	BMP6	1
GO:0070828	GO:0070828	heterochromatin organization	1/32	100/18870	0.156480682243832	0.253092729080746	0.181756146344923	BAZ2A	1
GO:0042692	GO:0042692	muscle cell differentiation	2/32	419/18870	0.158224119564966	0.255493045527036	0.183479910867398	TMOD2/TMOD3	2
GO:0002027	GO:0002027	regulation of heart rate	1/32	102/18870	0.159354451754651	0.25564191364549	0.183586819096734	CACNB2	1
GO:0008630	GO:0008630	intrinsic apoptotic signaling pathway in response to DNA damage	1/32	102/18870	0.159354451754651	0.25564191364549	0.183586819096734	EP300	1
GO:0019080	GO:0019080	viral gene expression	1/32	102/18870	0.159354451754651	0.25564191364549	0.183586819096734	EP300	1
GO:0070167	GO:0070167	regulation of biomineral tissue development	1/32	102/18870	0.159354451754651	0.25564191364549	0.183586819096734	BMP6	1
GO:0009408	GO:0009408	response to heat	1/32	103/18870	0.16078777749761	0.256687132633948	0.184337433214013	EP300	1
GO:0022600	GO:0022600	digestive system process	1/32	103/18870	0.16078777749761	0.256687132633948	0.184337433214013	SLC9A4	1
GO:0035282	GO:0035282	segmentation	1/32	103/18870	0.16078777749761	0.256687132633948	0.184337433214013	EP300	1
GO:0021549	GO:0021549	cerebellum development	1/32	104/18870	0.162218735621981	0.258552515513999	0.185677040262257	HSPA5	1
GO:0070252	GO:0070252	actin-mediated cell contraction	1/32	105/18870	0.163647329912725	0.260408109796501	0.187009617721879	CACNB2	1
GO:0030099	GO:0030099	myeloid cell differentiation	2/32	430/18870	0.164802094518289	0.261410708499545	0.187729624484846	EP300/TMOD3	2
GO:0032526	GO:0032526	response to retinoic acid	1/32	106/18870	0.165073564148951	0.261410708499545	0.187729624484846	BMP6	1
GO:0046425	GO:0046425	regulation of receptor signaling pathway via JAK-STAT	1/32	106/18870	0.165073564148951	0.261410708499545	0.187729624484846	EP300	1
GO:0016032	GO:0016032	viral process	2/32	432/18870	0.166003672309572	0.262461664887526	0.188484358861253	EP300/ILF3	2
GO:1901796	GO:1901796	regulation of signal transduction by p53 class mediator	1/32	107/18870	0.16649744210393	0.262820481526236	0.188742039631986	EP300	1
GO:0015837	GO:0015837	amine transport	1/32	108/18870	0.1679189675451	0.264217544779431	0.189745327375664	SLC44A2	1
GO:0090630	GO:0090630	activation of GTPase activity	1/32	108/18870	0.1679189675451	0.264217544779431	0.189745327375664	RANGAP1	1
GO:0007040	GO:0007040	lysosome organization	1/32	109/18870	0.169338144234076	0.264339258431958	0.189832734882474	TMEM175	1
GO:0035967	GO:0035967	cellular response to topologically incorrect protein	1/32	109/18870	0.169338144234076	0.264339258431958	0.189832734882474	HSPA5	1
GO:0061387	GO:0061387	regulation of extent of cell growth	1/32	109/18870	0.169338144234076	0.264339258431958	0.189832734882474	DNM2	1
GO:0080171	GO:0080171	lytic vacuole organization	1/32	109/18870	0.169338144234076	0.264339258431958	0.189832734882474	TMEM175	1
GO:0090277	GO:0090277	positive regulation of peptide hormone secretion	1/32	109/18870	0.169338144234076	0.264339258431958	0.189832734882474	GIPR	1
GO:0018210	GO:0018210	peptidyl-threonine modification	1/32	110/18870	0.170754975926657	0.264979569339445	0.190292568096294	DGKQ	1
GO:0031398	GO:0031398	positive regulation of protein ubiquitination	1/32	110/18870	0.170754975926657	0.264979569339445	0.190292568096294	HSPA5	1
GO:0120034	GO:0120034	positive regulation of plasma membrane bounded cell projection assembly	1/32	110/18870	0.170754975926657	0.264979569339445	0.190292568096294	AUTS2	1
GO:0042391	GO:0042391	regulation of membrane potential	2/32	440/18870	0.170826316733994	0.264979569339445	0.190292568096294	GABRB1/CACNB2	2
GO:0001938	GO:0001938	positive regulation of endothelial cell proliferation	1/32	111/18870	0.172169466372837	0.264979569339445	0.190292568096294	BMP6	1
GO:0002793	GO:0002793	positive regulation of peptide secretion	1/32	111/18870	0.172169466372837	0.264979569339445	0.190292568096294	GIPR	1
GO:0030512	GO:0030512	negative regulation of transforming growth factor beta receptor signaling pathway	1/32	111/18870	0.172169466372837	0.264979569339445	0.190292568096294	HSPA5	1
GO:0036503	GO:0036503	ERAD pathway	1/32	111/18870	0.172169466372837	0.264979569339445	0.190292568096294	HSPA5	1
GO:1905954	GO:1905954	positive regulation of lipid localization	1/32	111/18870	0.172169466372837	0.264979569339445	0.190292568096294	BMP6	1
GO:0030203	GO:0030203	glycosaminoglycan metabolic process	1/32	112/18870	0.173581619316815	0.266736185689646	0.191554065491255	IDUA	1
GO:1901222	GO:1901222	regulation of non-canonical NF-kappaB signal transduction	1/32	113/18870	0.174991438496997	0.26848374909586	0.192809061600233	EP300	1
GO:0022037	GO:0022037	metencephalon development	1/32	114/18870	0.176398927646014	0.270222307513722	0.194057590862112	HSPA5	1
GO:0062014	GO:0062014	negative regulation of small molecule metabolic process	1/32	115/18870	0.177804090490721	0.271951908592173	0.195299687495528	EP300	1
GO:0010975	GO:0010975	regulation of neuron projection development	2/32	453/18870	0.178715773778443	0.2729225382508	0.195996735992025	EP300/GAK	2
GO:0019882	GO:0019882	antigen processing and presentation	1/32	116/18870	0.179206930752214	0.273248957880697	0.196231151157711	DNM2	1
GO:0006090	GO:0006090	pyruvate metabolic process	1/32	118/18870	0.182005658381172	0.276659835656566	0.198680640727985	EP300	1
GO:0051928	GO:0051928	positive regulation of calcium ion transport	1/32	118/18870	0.182005658381172	0.276659835656566	0.198680640727985	CACNB2	1
GO:0072594	GO:0072594	establishment of protein localization to organelle	2/32	459/18870	0.182377573332499	0.276798011914502	0.198779870698953	EP300/HSPA5	2
GO:0006906	GO:0006906	vesicle fusion	1/32	119/18870	0.183401553162092	0.277071364823099	0.198976176501333	TMEM175	1
GO:1901989	GO:1901989	positive regulation of cell cycle phase transition	1/32	119/18870	0.183401553162092	0.277071364823099	0.198976176501333	TMOD3	1
GO:1904892	GO:1904892	regulation of receptor signaling pathway via STAT	1/32	119/18870	0.183401553162092	0.277071364823099	0.198976176501333	EP300	1
GO:0045814	GO:0045814	negative regulation of gene expression, epigenetic	1/32	120/18870	0.18479514018672	0.278713718541423	0.200155617269395	BAZ2A	1
GO:0007015	GO:0007015	actin filament organization	2/32	464/18870	0.185438349228088	0.278713718541423	0.200155617269395	TMOD2/TMOD3	2
GO:0006022	GO:0006022	aminoglycan metabolic process	1/32	121/18870	0.186186423147469	0.278713718541423	0.200155617269395	IDUA	1
GO:0030278	GO:0030278	regulation of ossification	1/32	121/18870	0.186186423147469	0.278713718541423	0.200155617269395	BMP6	1
GO:0051702	GO:0051702	biological process involved in interaction with symbiont	1/32	121/18870	0.186186423147469	0.278713718541423	0.200155617269395	EP300	1
GO:0090174	GO:0090174	organelle membrane fusion	1/32	121/18870	0.186186423147469	0.278713718541423	0.200155617269395	TMEM175	1
GO:0030518	GO:0030518	intracellular steroid hormone receptor signaling pathway	1/32	122/18870	0.187575405731035	0.280366881100257	0.201342820303898	EP300	1
GO:0030282	GO:0030282	bone mineralization	1/32	123/18870	0.188962091618415	0.280972952833241	0.201778064978828	BMP6	1
GO:0071482	GO:0071482	cellular response to light stimulus	1/32	123/18870	0.188962091618415	0.280972952833241	0.201778064978828	EP300	1
GO:2001257	GO:2001257	regulation of cation channel activity	1/32	123/18870	0.188962091618415	0.280972952833241	0.201778064978828	CACNB2	1
GO:0044772	GO:0044772	mitotic cell cycle phase transition	2/32	470/18870	0.189121896171004	0.280972952833241	0.201778064978828	DNM2/TMOD3	2
GO:0045446	GO:0045446	endothelial cell differentiation	1/32	124/18870	0.190346484484912	0.282366396412105	0.202778753287667	BMP6	1
GO:0033865	GO:0033865	nucleoside bisphosphate metabolic process	1/32	125/18870	0.19172858800014	0.283137420060177	0.203332456618156	ACSS2	1
GO:0033875	GO:0033875	ribonucleoside bisphosphate metabolic process	1/32	125/18870	0.19172858800014	0.283137420060177	0.203332456618156	ACSS2	1
GO:0034032	GO:0034032	purine nucleoside bisphosphate metabolic process	1/32	125/18870	0.19172858800014	0.283137420060177	0.203332456618156	ACSS2	1
GO:0043200	GO:0043200	response to amino acid	1/32	126/18870	0.193108405828041	0.284748173264402	0.204489203776306	EP300	1
GO:0046683	GO:0046683	response to organophosphorus	1/32	127/18870	0.194485941626884	0.285497246650492	0.205027143734043	DGKQ	1
GO:0051099	GO:0051099	positive regulation of binding	1/32	127/18870	0.194485941626884	0.285497246650492	0.205027143734043	EP300	1
GO:0051384	GO:0051384	response to glucocorticoid	1/32	127/18870	0.194485941626884	0.285497246650492	0.205027143734043	BMP6	1
GO:0031623	GO:0031623	receptor internalization	1/32	128/18870	0.195861199049278	0.286661636052806	0.205863338955368	DNM2	1
GO:0045931	GO:0045931	positive regulation of mitotic cell cycle	1/32	128/18870	0.195861199049278	0.286661636052806	0.205863338955368	TMOD3	1
GO:0051224	GO:0051224	negative regulation of protein transport	1/32	129/18870	0.197234181742183	0.288242832368027	0.206998860113614	RANGAP1	1
GO:0023061	GO:0023061	signal release	2/32	484/18870	0.197758729231426	0.288581256730304	0.207241896364161	GIPR/BMP6	2
GO:0019079	GO:0019079	viral genome replication	1/32	131/18870	0.199973337499149	0.290521736632245	0.208635433627431	ILF3	1
GO:0030218	GO:0030218	erythrocyte differentiation	1/32	131/18870	0.199973337499149	0.290521736632245	0.208635433627431	TMOD3	1
GO:0072329	GO:0072329	monocarboxylic acid catabolic process	1/32	131/18870	0.199973337499149	0.290521736632245	0.208635433627431	IDUA	1
GO:1903322	GO:1903322	positive regulation of protein modification by small protein conjugation or removal	1/32	132/18870	0.201339517828944	0.292075736467614	0.209751423891249	HSPA5	1
GO:0030048	GO:0030048	actin filament-based movement	1/32	133/18870	0.202703437960734	0.29276083048581	0.210243417671883	CACNB2	1
GO:0030168	GO:0030168	platelet activation	1/32	133/18870	0.202703437960734	0.29276083048581	0.210243417671883	DGKQ	1
GO:1904950	GO:1904950	negative regulation of establishment of protein localization	1/32	133/18870	0.202703437960734	0.29276083048581	0.210243417671883	RANGAP1	1
GO:0006639	GO:0006639	acylglycerol metabolic process	1/32	134/18870	0.204065101513344	0.293436678818458	0.210728771751006	DGKQ	1
GO:0007041	GO:0007041	lysosomal transport	1/32	134/18870	0.204065101513344	0.293436678818458	0.210728771751006	GAK	1
GO:0007586	GO:0007586	digestion	1/32	134/18870	0.204065101513344	0.293436678818458	0.210728771751006	SLC9A4	1
GO:0006612	GO:0006612	protein targeting to membrane	1/32	135/18870	0.205424512099999	0.294531505703783	0.211515011309583	HSPA5	1
GO:0006638	GO:0006638	neutral lipid metabolic process	1/32	135/18870	0.205424512099999	0.294531505703783	0.211515011309583	DGKQ	1
GO:0016049	GO:0016049	cell growth	2/32	497/18870	0.2058260906771	0.294678342030441	0.211620460426883	AUTS2/DNM2	2
GO:0006986	GO:0006986	response to unfolded protein	1/32	137/18870	0.208136588800387	0.296692532515747	0.213066932247483	HSPA5	1
GO:0098659	GO:0098659	inorganic cation import across plasma membrane	1/32	137/18870	0.208136588800387	0.296692532515747	0.213066932247483	SLC9A4	1
GO:0099587	GO:0099587	inorganic ion import across plasma membrane	1/32	137/18870	0.208136588800387	0.296692532515747	0.213066932247483	SLC9A4	1
GO:0043401	GO:0043401	steroid hormone mediated signaling pathway	1/32	138/18870	0.209489262112637	0.29818919534819	0.214141746485689	EP300	1
GO:0043467	GO:0043467	regulation of generation of precursor metabolites and energy	1/32	139/18870	0.210839696855985	0.299246543808567	0.214901071268348	EP300	1
GO:0060048	GO:0060048	cardiac muscle contraction	1/32	139/18870	0.210839696855985	0.299246543808567	0.214901071268348	CACNB2	1
GO:0000086	GO:0000086	G2/M transition of mitotic cell cycle	1/32	140/18870	0.212187896615774	0.299434209407647	0.215035841540945	DNM2	1
GO:0008203	GO:0008203	cholesterol metabolic process	1/32	140/18870	0.212187896615774	0.299434209407647	0.215035841540945	DGKQ	1
GO:0010977	GO:0010977	negative regulation of neuron projection development	1/32	140/18870	0.212187896615774	0.299434209407647	0.215035841540945	GAK	1
GO:0034101	GO:0034101	erythrocyte homeostasis	1/32	140/18870	0.212187896615774	0.299434209407647	0.215035841540945	TMOD3	1
GO:0001101	GO:0001101	response to acid chemical	1/32	141/18870	0.213533864971797	0.300472652853171	0.215781589866237	EP300	1
GO:1904064	GO:1904064	positive regulation of cation transmembrane transport	1/32	141/18870	0.213533864971797	0.300472652853171	0.215781589866237	CACNB2	1
GO:0003158	GO:0003158	endothelium development	1/32	143/18870	0.216219121764002	0.302522492809009	0.217253663016462	BMP6	1
GO:0014074	GO:0014074	response to purine-containing compound	1/32	143/18870	0.216219121764002	0.302522492809009	0.217253663016462	DGKQ	1
GO:1900180	GO:1900180	regulation of protein localization to nucleus	1/32	143/18870	0.216219121764002	0.302522492809009	0.217253663016462	EP300	1
GO:1903900	GO:1903900	regulation of viral life cycle	1/32	143/18870	0.216219121764002	0.302522492809009	0.217253663016462	ILF3	1
GO:0006997	GO:0006997	nucleus organization	1/32	144/18870	0.217558417332088	0.303534052510067	0.217980105035282	BAZ2A	1
GO:0051592	GO:0051592	response to calcium ion	1/32	144/18870	0.217558417332088	0.303534052510067	0.217980105035282	GIPR	1
GO:0030534	GO:0030534	adult behavior	1/32	145/18870	0.21889549576023	0.304536812604275	0.218700227699784	NRXN3	1
GO:0045834	GO:0045834	positive regulation of lipid metabolic process	1/32	145/18870	0.21889549576023	0.304536812604275	0.218700227699784	BMP6	1
GO:0001508	GO:0001508	action potential	1/32	146/18870	0.220230360600586	0.305530852382504	0.219414087951956	CACNB2	1
GO:0045598	GO:0045598	regulation of fat cell differentiation	1/32	146/18870	0.220230360600586	0.305530852382504	0.219414087951956	FTO	1
GO:0062013	GO:0062013	positive regulation of small molecule metabolic process	1/32	147/18870	0.221563015399816	0.306947356074288	0.220431336662486	BMP6	1
GO:0038061	GO:0038061	non-canonical NF-kappaB signal transduction	1/32	148/18870	0.222893463699085	0.307924350271527	0.221132955792109	EP300	1
GO:0060078	GO:0060078	regulation of postsynaptic membrane potential	1/32	148/18870	0.222893463699085	0.307924350271527	0.221132955792109	GABRB1	1
GO:0031960	GO:0031960	response to corticosteroid	1/32	149/18870	0.224221709034072	0.309325466944763	0.222139	BMP6	1
GO:0007612	GO:0007612	learning	1/32	150/18870	0.225547754934981	0.309421362967905	0.222208021281787	NRXN3	1
GO:0045667	GO:0045667	regulation of osteoblast differentiation	1/32	150/18870	0.225547754934981	0.309421362967905	0.222208021281787	BMP6	1
GO:0051092	GO:0051092	positive regulation of NF-kappaB transcription factor activity	1/32	150/18870	0.225547754934981	0.309421362967905	0.222208021281787	EP300	1
GO:1902652	GO:1902652	secondary alcohol metabolic process	1/32	150/18870	0.225547754934981	0.309421362967905	0.222208021281787	DGKQ	1
GO:0009411	GO:0009411	response to UV	1/32	152/18870	0.228193262528038	0.312181060541829	0.22418987195737	EP300	1
GO:0010821	GO:0010821	regulation of mitochondrion organization	1/32	152/18870	0.228193262528038	0.312181060541829	0.22418987195737	EP300	1
GO:0030183	GO:0030183	B cell differentiation	1/32	153/18870	0.229512731253281	0.313116399285986	0.224861576617881	EP300	1
GO:0032368	GO:0032368	regulation of lipid transport	1/32	153/18870	0.229512731253281	0.313116399285986	0.224861576617881	BMP6	1
GO:0006352	GO:0006352	DNA-templated transcription initiation	1/32	154/18870	0.230830014610651	0.314043597225817	0.225527435036868	BAZ2A	1
GO:0016125	GO:0016125	sterol metabolic process	1/32	154/18870	0.230830014610651	0.314043597225817	0.225527435036868	DGKQ	1
GO:0007584	GO:0007584	response to nutrient	1/32	155/18870	0.232145116103089	0.314962726393309	0.226187498943418	GIPR	1
GO:0044839	GO:0044839	cell cycle G2/M phase transition	1/32	155/18870	0.232145116103089	0.314962726393309	0.226187498943418	DNM2	1
GO:0046718	GO:0046718	viral entry into host cell	1/32	156/18870	0.233458039228106	0.316308347509882	0.227153844003891	ILF3	1
GO:0007030	GO:0007030	Golgi organization	1/32	157/18870	0.234768787477796	0.316806817266699	0.227511815338736	GAK	1
GO:0030902	GO:0030902	hindbrain development	1/32	157/18870	0.234768787477796	0.316806817266699	0.227511815338736	HSPA5	1
GO:0007189	GO:0007189	adenylate cyclase-activating G protein-coupled receptor signaling pathway	1/32	158/18870	0.23607736433884	0.316806817266699	0.227511815338736	GIPR	1
GO:0010976	GO:0010976	positive regulation of neuron projection development	1/32	158/18870	0.23607736433884	0.316806817266699	0.227511815338736	EP300	1
GO:0034767	GO:0034767	positive regulation of monoatomic ion transmembrane transport	1/32	158/18870	0.23607736433884	0.316806817266699	0.227511815338736	CACNB2	1
GO:0048284	GO:0048284	organelle fusion	1/32	158/18870	0.23607736433884	0.316806817266699	0.227511815338736	TMEM175	1
GO:0090316	GO:0090316	positive regulation of intracellular protein transport	1/32	158/18870	0.23607736433884	0.316806817266699	0.227511815338736	EP300	1
GO:0035966	GO:0035966	response to topologically incorrect protein	1/32	159/18870	0.237383773292514	0.318126553323982	0.228459571289036	HSPA5	1
GO:0006606	GO:0006606	protein import into nucleus	1/32	161/18870	0.239990101375895	0.320746607673346	0.230341138505465	EP300	1
GO:0044272	GO:0044272	sulfur compound biosynthetic process	1/32	161/18870	0.239990101375895	0.320746607673346	0.230341138505465	ACSS2	1
GO:0044409	GO:0044409	entry into host	1/32	163/18870	0.242587799470388	0.32334097764321	0.232204260728012	ILF3	1
GO:0061157	GO:0061157	mRNA destabilization	1/32	163/18870	0.242587799470388	0.32334097764321	0.232204260728012	FTO	1
GO:0050796	GO:0050796	regulation of insulin secretion	1/32	165/18870	0.245176895232504	0.326350326762184	0.23436539629622	GIPR	1
GO:0007519	GO:0007519	skeletal muscle tissue development	1/32	166/18870	0.246468225858142	0.327184908989582	0.234964743618487	EP300	1
GO:0051170	GO:0051170	import into nucleus	1/32	166/18870	0.246468225858142	0.327184908989582	0.234964743618487	EP300	1
GO:0030509	GO:0030509	BMP signaling pathway	1/32	167/18870	0.247757416233063	0.327571885892037	0.235242647415922	BMP6	1
GO:0050779	GO:0050779	RNA destabilization	1/32	167/18870	0.247757416233063	0.327571885892037	0.235242647415922	FTO	1
GO:0061014	GO:0061014	positive regulation of mRNA catabolic process	1/32	167/18870	0.247757416233063	0.327571885892037	0.235242647415922	FTO	1
GO:0006633	GO:0006633	fatty acid biosynthetic process	1/32	168/18870	0.249044469790276	0.327952944844147	0.235516301293365	ACSS2	1
GO:0050792	GO:0050792	regulation of viral process	1/32	168/18870	0.249044469790276	0.327952944844147	0.235516301293365	ILF3	1
GO:0051168	GO:0051168	nuclear export	1/32	168/18870	0.249044469790276	0.327952944844147	0.235516301293365	RANGAP1	1
GO:0007034	GO:0007034	vacuolar transport	1/32	169/18870	0.250329389957462	0.329204871973431	0.236415360904243	GAK	1
GO:0007009	GO:0007009	plasma membrane organization	1/32	170/18870	0.251612180156989	0.330450663272846	0.237310014127013	DNM2	1
GO:0009266	GO:0009266	response to temperature stimulus	1/32	171/18870	0.252892843805918	0.33124927014472	0.237883526088434	EP300	1
GO:0030856	GO:0030856	regulation of epithelial cell differentiation	1/32	171/18870	0.252892843805918	0.33124927014472	0.237883526088434	BMP6	1
GO:0002262	GO:0002262	myeloid cell homeostasis	1/32	173/18870	0.255447805093735	0.333708339545529	0.239649483488747	TMOD3	1
GO:0007204	GO:0007204	positive regulation of cytosolic calcium ion concentration	1/32	173/18870	0.255447805093735	0.333708339545529	0.239649483488747	GIPR	1
GO:0007259	GO:0007259	receptor signaling pathway via JAK-STAT	1/32	174/18870	0.256722109540277	0.334043960234046	0.239890506307538	EP300	1
GO:0046661	GO:0046661	male sex differentiation	1/32	174/18870	0.256722109540277	0.334043960234046	0.239890506307538	BMP6	1
GO:1903169	GO:1903169	regulation of calcium ion transmembrane transport	1/32	174/18870	0.256722109540277	0.334043960234046	0.239890506307538	CACNB2	1
GO:0031214	GO:0031214	biomineral tissue development	1/32	175/18870	0.257994301051547	0.334814738518806	0.240444033432688	BMP6	1
GO:0072331	GO:0072331	signal transduction by p53 class mediator	1/32	175/18870	0.257994301051547	0.334814738518806	0.240444033432688	EP300	1
GO:0001764	GO:0001764	neuron migration	1/32	177/18870	0.260532358825582	0.337663649267366	0.242489951704697	AUTS2	1
GO:0060538	GO:0060538	skeletal muscle organ development	1/32	178/18870	0.261798231853859	0.338271638897829	0.242926573699536	EP300	1
GO:1901136	GO:1901136	carbohydrate derivative catabolic process	1/32	178/18870	0.261798231853859	0.338271638897829	0.242926573699536	IDUA	1
GO:0009267	GO:0009267	cellular response to starvation	1/32	179/18870	0.263062005477905	0.338271638897829	0.242926573699536	HSPA5	1
GO:0071772	GO:0071772	response to BMP	1/32	179/18870	0.263062005477905	0.338271638897829	0.242926573699536	BMP6	1
GO:0071773	GO:0071773	cellular response to BMP stimulus	1/32	179/18870	0.263062005477905	0.338271638897829	0.242926573699536	BMP6	1
GO:0090101	GO:0090101	negative regulation of transmembrane receptor protein serine/threonine kinase signaling pathway	1/32	179/18870	0.263062005477905	0.338271638897829	0.242926573699536	HSPA5	1
GO:0035725	GO:0035725	sodium ion transmembrane transport	1/32	180/18870	0.264323683067371	0.339450883730588	0.243773437207539	SLC9A4	1
GO:0001936	GO:0001936	regulation of endothelial cell proliferation	1/32	181/18870	0.265583267986678	0.339739635021919	0.243980801212642	BMP6	1
GO:0021953	GO:0021953	central nervous system neuron differentiation	1/32	181/18870	0.265583267986678	0.339739635021919	0.243980801212642	GABRB1	1
GO:0071478	GO:0071478	cellular response to radiation	1/32	181/18870	0.265583267986678	0.339739635021919	0.243980801212642	EP300	1
GO:0016482	GO:0016482	cytosolic transport	1/32	182/18870	0.266840763595027	0.340741587932527	0.244700344205886	GAK	1
GO:0001659	GO:0001659	temperature homeostasis	1/32	183/18870	0.268096173246405	0.340741587932527	0.244700344205886	FTO	1
GO:0046578	GO:0046578	regulation of Ras protein signal transduction	1/32	183/18870	0.268096173246405	0.340741587932527	0.244700344205886	AUTS2	1
GO:0061025	GO:0061025	membrane fusion	1/32	183/18870	0.268096173246405	0.340741587932527	0.244700344205886	TMEM175	1
GO:1905952	GO:1905952	regulation of lipid localization	1/32	183/18870	0.268096173246405	0.340741587932527	0.244700344205886	BMP6	1
GO:0006941	GO:0006941	striated muscle contraction	1/32	186/18870	0.271849919920571	0.345067230827014	0.247806763682344	CACNB2	1
GO:0008361	GO:0008361	regulation of cell size	1/32	187/18870	0.273097019179967	0.34620407193342	0.248623175355873	DNM2	1
GO:0030324	GO:0030324	lung development	1/32	188/18870	0.274342049174413	0.346444767226663	0.248796028401087	EP300	1
GO:0044000	GO:0044000	movement in host	1/32	188/18870	0.274342049174413	0.346444767226663	0.248796028401087	ILF3	1
GO:0097696	GO:0097696	receptor signaling pathway via STAT	1/32	188/18870	0.274342049174413	0.346444767226663	0.248796028401087	EP300	1
GO:0030258	GO:0030258	lipid modification	1/32	192/18870	0.279301542882877	0.351356347049341	0.25232323293311	DGKQ	1
GO:0030323	GO:0030323	respiratory tube development	1/32	192/18870	0.279301542882877	0.351356347049341	0.25232323293311	EP300	1
GO:0031345	GO:0031345	negative regulation of cell projection organization	1/32	192/18870	0.279301542882877	0.351356347049341	0.25232323293311	GAK	1
GO:0009749	GO:0009749	response to glucose	1/32	193/18870	0.280536276292651	0.352010486813071	0.252792997209067	GIPR	1
GO:0009755	GO:0009755	hormone-mediated signaling pathway	1/32	193/18870	0.280536276292651	0.352010486813071	0.252792997209067	EP300	1
GO:0090276	GO:0090276	regulation of peptide hormone secretion	1/32	195/18870	0.282999598189476	0.354649623685285	0.254688268358548	GIPR	1
GO:0043123	GO:0043123	positive regulation of canonical NF-kappaB signal transduction	1/32	196/18870	0.284228193255497	0.355736684061835	0.255468930472405	SLC44A2	1
GO:0002791	GO:0002791	regulation of peptide secretion	1/32	198/18870	0.286679268031881	0.356989986107968	0.256368977466796	GIPR	1
GO:0009746	GO:0009746	response to hexose	1/32	198/18870	0.286679268031881	0.356989986107968	0.256368977466796	GIPR	1
GO:0045664	GO:0045664	regulation of neuron differentiation	1/32	198/18870	0.286679268031881	0.356989986107968	0.256368977466796	BMP6	1
GO:0051650	GO:0051650	establishment of vesicle localization	1/32	198/18870	0.286679268031881	0.356989986107968	0.256368977466796	DNM2	1
GO:0030073	GO:0030073	insulin secretion	1/32	199/18870	0.28790175429061	0.358059631283145	0.257137133018726	GIPR	1
GO:0031396	GO:0031396	regulation of protein ubiquitination	1/32	200/18870	0.289122210820132	0.358220600827459	0.257252731772431	HSPA5	1
GO:0071248	GO:0071248	cellular response to metal ion	1/32	200/18870	0.289122210820132	0.358220600827459	0.257252731772431	BMP6	1
GO:0090087	GO:0090087	regulation of peptide transport	1/32	200/18870	0.289122210820132	0.358220600827459	0.257252731772431	GIPR	1
GO:0032388	GO:0032388	positive regulation of intracellular transport	1/32	201/18870	0.290340640881929	0.359278305613945	0.258012312447311	EP300	1
GO:0001935	GO:0001935	endothelial cell proliferation	1/32	202/18870	0.291557047732418	0.360330855729525	0.258768191344099	BMP6	1
GO:0120032	GO:0120032	regulation of plasma membrane bounded cell projection assembly	1/32	203/18870	0.292771434622956	0.360925986362467	0.259195578771657	AUTS2	1
GO:1903313	GO:1903313	positive regulation of mRNA metabolic process	1/32	203/18870	0.292771434622956	0.360925986362467	0.259195578771657	FTO	1
GO:0007623	GO:0007623	circadian rhythm	1/32	204/18870	0.293983804799849	0.361967559659814	0.259943574770393	EP300	1
GO:0022408	GO:0022408	negative regulation of cell-cell adhesion	1/32	205/18870	0.29519416150436	0.362551432770318	0.260362877714831	BMP6	1
GO:0060491	GO:0060491	regulation of cell projection assembly	1/32	205/18870	0.29519416150436	0.362551432770318	0.260362877714831	AUTS2	1
GO:0034284	GO:0034284	response to monosaccharide	1/32	206/18870	0.296402507972716	0.363582154860679	0.261103081022042	GIPR	1
GO:0008016	GO:0008016	regulation of heart contraction	1/32	208/18870	0.298813183120734	0.364722410624439	0.26192194489941	CACNB2	1
GO:0031330	GO:0031330	negative regulation of cellular catabolic process	1/32	208/18870	0.298813183120734	0.364722410624439	0.26192194489941	EP300	1
GO:0071383	GO:0071383	cellular response to steroid hormone stimulus	1/32	208/18870	0.298813183120734	0.364722410624439	0.26192194489941	EP300	1
GO:1901654	GO:1901654	response to ketone	1/32	208/18870	0.298813183120734	0.364722410624439	0.26192194489941	GABRB1	1
GO:0051701	GO:0051701	biological process involved in interaction with host	1/32	211/18870	0.302414199688531	0.368660874620301	0.264750315516797	ILF3	1
GO:0098739	GO:0098739	import across plasma membrane	1/32	212/18870	0.303610552419651	0.369661797445434	0.265469118763913	SLC9A4	1
GO:0009152	GO:0009152	purine ribonucleotide biosynthetic process	1/32	213/18870	0.304804917427828	0.37020079367005	0.265856193797781	ACSS2	1
GO:0009612	GO:0009612	response to mechanical stimulus	1/32	213/18870	0.304804917427828	0.37020079367005	0.265856193797781	BMP6	1
GO:0043270	GO:0043270	positive regulation of monoatomic ion transport	1/32	214/18870	0.305997297909273	0.370279285553604	0.265912562000558	CACNB2	1
GO:0045216	GO:0045216	cell-cell junction organization	1/32	214/18870	0.305997297909273	0.370279285553604	0.265912562000558	BMP6	1
GO:0060541	GO:0060541	respiratory system development	1/32	214/18870	0.305997297909273	0.370279285553604	0.265912562000558	EP300	1
GO:0060348	GO:0060348	bone development	1/32	215/18870	0.307187697055226	0.371263658404169	0.266619480040184	BMP6	1
GO:0051648	GO:0051648	vesicle localization	1/32	216/18870	0.308376118051969	0.372243230736751	0.267322950633286	DNM2	1
GO:0034764	GO:0034764	positive regulation of transmembrane transport	1/32	217/18870	0.309562564080828	0.372761767261144	0.267695332727212	CACNB2	1
GO:0050821	GO:0050821	protein stabilization	1/32	217/18870	0.309562564080828	0.372761767261144	0.267695332727212	EP300	1
GO:0042594	GO:0042594	response to starvation	1/32	218/18870	0.310747038318185	0.372820746337895	0.267737687992589	HSPA5	1
GO:0050679	GO:0050679	positive regulation of epithelial cell proliferation	1/32	218/18870	0.310747038318185	0.372820746337895	0.267737687992589	BMP6	1
GO:1903828	GO:1903828	negative regulation of protein localization	1/32	218/18870	0.310747038318185	0.372820746337895	0.267737687992589	RANGAP1	1
GO:0007601	GO:0007601	visual perception	1/32	219/18870	0.311929543935481	0.373330013094106	0.26810341309029	CACNB2	1
GO:0009952	GO:0009952	anterior/posterior pattern specification	1/32	219/18870	0.311929543935481	0.373330013094106	0.26810341309029	EP300	1
GO:0050953	GO:0050953	sensory perception of light stimulus	1/32	223/18870	0.316639943460482	0.37850769940361	0.271821719475528	CACNB2	1
GO:0007596	GO:0007596	blood coagulation	1/32	224/18870	0.317812653376782	0.379449046758946	0.272497739163251	DGKQ	1
GO:0071222	GO:0071222	cellular response to lipopolysaccharide	1/32	226/18870	0.320152227262359	0.381317949036788	0.273839873633686	BMP6	1
GO:0072330	GO:0072330	monocarboxylic acid biosynthetic process	1/32	226/18870	0.320152227262359	0.381317949036788	0.273839873633686	ACSS2	1
GO:0009260	GO:0009260	ribonucleotide biosynthetic process	1/32	228/18870	0.322484027441372	0.383631361147042	0.27550122863031	ACSS2	1
GO:0050817	GO:0050817	coagulation	1/32	229/18870	0.323647020206197	0.384087126389282	0.275828532122466	DGKQ	1
GO:0071241	GO:0071241	cellular response to inorganic substance	1/32	229/18870	0.323647020206197	0.384087126389282	0.275828532122466	BMP6	1
GO:0009743	GO:0009743	response to carbohydrate	1/32	230/18870	0.324808078912994	0.384538410732331	0.276152617699307	GIPR	1
GO:0048705	GO:0048705	skeletal system morphogenesis	1/32	230/18870	0.324808078912994	0.384538410732331	0.276152617699307	BMP6	1
GO:0007599	GO:0007599	hemostasis	1/32	231/18870	0.325967206674517	0.384985250089208	0.276473511151427	DGKQ	1
GO:0032412	GO:0032412	regulation of monoatomic ion transmembrane transporter activity	1/32	231/18870	0.325967206674517	0.384985250089208	0.276473511151427	CACNB2	1
GO:0007033	GO:0007033	vacuole organization	1/32	232/18870	0.327124406598677	0.385889270059517	0.27712272453112	TMEM175	1
GO:0007411	GO:0007411	axon guidance	1/32	233/18870	0.328279681788549	0.386326746190825	0.277436893871477	NRXN3	1
GO:0097485	GO:0097485	neuron projection guidance	1/32	233/18870	0.328279681788549	0.386326746190825	0.277436893871477	NRXN3	1
GO:0022618	GO:0022618	protein-RNA complex assembly	1/32	235/18870	0.330584470353598	0.387649646783684	0.27838692240303	SNRPD2	1
GO:0043488	GO:0043488	regulation of mRNA stability	1/32	235/18870	0.330584470353598	0.387649646783684	0.27838692240303	FTO	1
GO:0046390	GO:0046390	ribose phosphate biosynthetic process	1/32	235/18870	0.330584470353598	0.387649646783684	0.27838692240303	ACSS2	1
GO:0022898	GO:0022898	regulation of transmembrane transporter activity	1/32	239/18870	0.335171086672494	0.39162932428518	0.281244890109154	CACNB2	1
GO:0043547	GO:0043547	positive regulation of GTPase activity	1/32	239/18870	0.335171086672494	0.39162932428518	0.281244890109154	RANGAP1	1
GO:0071219	GO:0071219	cellular response to molecule of bacterial origin	1/32	239/18870	0.335171086672494	0.39162932428518	0.281244890109154	BMP6	1
GO:0065004	GO:0065004	protein-DNA complex assembly	1/32	240/18870	0.336312975203785	0.392497962767451	0.281868694608311	BAZ2A	1
GO:0030072	GO:0030072	peptide hormone secretion	1/32	241/18870	0.337452963652174	0.393362330411114	0.282489432045171	GIPR	1
GO:0060047	GO:0060047	heart contraction	1/32	243/18870	0.339727252534997	0.394612433663882	0.283387181856402	CACNB2	1
GO:0071826	GO:0071826	protein-RNA complex organization	1/32	243/18870	0.339727252534997	0.394612433663882	0.283387181856402	SNRPD2	1
GO:1903320	GO:1903320	regulation of protein modification by small protein conjugation or removal	1/32	243/18870	0.339727252534997	0.394612433663882	0.283387181856402	HSPA5	1
GO:0051091	GO:0051091	positive regulation of DNA-binding transcription factor activity	1/32	244/18870	0.340861559074906	0.395463646276539	0.283998472132337	EP300	1
GO:0002790	GO:0002790	peptide secretion	1/32	246/18870	0.343124511579773	0.397620757536561	0.285547581153694	GIPR	1
GO:0043487	GO:0043487	regulation of RNA stability	1/32	247/18870	0.344253163621733	0.398459889738433	0.286150195997037	FTO	1
GO:0006814	GO:0006814	sodium ion transport	1/32	248/18870	0.345379936900157	0.398826773559971	0.286413670138712	SLC9A4	1
GO:0007188	GO:0007188	adenylate cyclase-modulating G protein-coupled receptor signaling pathway	1/32	248/18870	0.345379936900157	0.398826773559971	0.286413670138712	GIPR	1
GO:0051924	GO:0051924	regulation of calcium ion transport	1/32	251/18870	0.348749014397502	0.40212401201739	0.288781550708721	CACNB2	1
GO:0016054	GO:0016054	organic acid catabolic process	1/32	252/18870	0.349868302841526	0.40212401201739	0.288781550708721	IDUA	1
GO:0046395	GO:0046395	carboxylic acid catabolic process	1/32	252/18870	0.349868302841526	0.40212401201739	0.288781550708721	IDUA	1
GO:0061013	GO:0061013	regulation of mRNA catabolic process	1/32	252/18870	0.349868302841526	0.40212401201739	0.288781550708721	FTO	1
GO:0002758	GO:0002758	innate immune response-activating signaling pathway	1/32	255/18870	0.353214998118574	0.405025347085909	0.290865117009597	EP300	1
GO:0003015	GO:0003015	heart process	1/32	255/18870	0.353214998118574	0.405025347085909	0.290865117009597	CACNB2	1
GO:0001649	GO:0001649	osteoblast differentiation	1/32	257/18870	0.355436849897512	0.406948813689785	0.292246436333995	BMP6	1
GO:0006164	GO:0006164	purine nucleotide biosynthetic process	1/32	258/18870	0.356545001232776	0.406948813689785	0.292246436333995	ACSS2	1
GO:0009636	GO:0009636	response to toxic substance	1/32	258/18870	0.356545001232776	0.406948813689785	0.292246436333995	GABRB1	1
GO:1903522	GO:1903522	regulation of blood circulation	1/32	258/18870	0.356545001232776	0.406948813689785	0.292246436333995	CACNB2	1
GO:0015833	GO:0015833	peptide transport	1/32	262/18870	0.360959179021875	0.410559805238506	0.294839635714963	GIPR	1
GO:0051098	GO:0051098	regulation of binding	1/32	262/18870	0.360959179021875	0.410559805238506	0.294839635714963	EP300	1
GO:0090068	GO:0090068	positive regulation of cell cycle process	1/32	262/18870	0.360959179021875	0.410559805238506	0.294839635714963	TMOD3	1
GO:0043122	GO:0043122	regulation of canonical NF-kappaB signal transduction	1/32	265/18870	0.364250546481075	0.413825592022905	0.297184929563871	SLC44A2	1
GO:0034976	GO:0034976	response to endoplasmic reticulum stress	1/32	266/18870	0.365344015038592	0.414589694485038	0.297733662510228	HSPA5	1
GO:0072522	GO:0072522	purine-containing compound biosynthetic process	1/32	267/18870	0.366435661540353	0.415349973092345	0.298279649391457	ACSS2	1
GO:0003018	GO:0003018	vascular process in circulatory system	1/32	269/18870	0.36861350012533	0.417338273130402	0.299707528232573	BMP6	1
GO:0032409	GO:0032409	regulation of transporter activity	1/32	271/18870	0.370784085687682	0.419313805284003	0.301126237938392	CACNB2	1
GO:0002218	GO:0002218	activation of innate immune response	1/32	276/18870	0.376178970862453	0.42492693382972	0.305157253041488	EP300	1
GO:0042113	GO:0042113	B cell activation	1/32	278/18870	0.378324354474589	0.426860812322418	0.306546049565231	EP300	1
GO:0090150	GO:0090150	establishment of protein localization to membrane	1/32	280/18870	0.380462589695554	0.428782209210665	0.307925882542951	HSPA5	1
GO:0007548	GO:0007548	sex differentiation	1/32	288/18870	0.388944506640823	0.437840387475669	0.314430927473844	BMP6	1
GO:0006520	GO:0006520	amino acid metabolic process	1/32	291/18870	0.392096132471427	0.440381631111009	0.316255897522413	GSS	1
GO:0030100	GO:0030100	regulation of endocytosis	1/32	291/18870	0.392096132471427	0.440381631111009	0.316255897522413	DGKQ	1
GO:0009165	GO:0009165	nucleotide biosynthetic process	1/32	295/18870	0.396273813995814	0.443556484983951	0.318535888762186	ACSS2	1
GO:0018105	GO:0018105	peptidyl-serine phosphorylation	1/32	295/18870	0.396273813995814	0.443556484983951	0.318535888762186	DGKQ	1
GO:0051056	GO:0051056	regulation of small GTPase mediated signal transduction	1/32	295/18870	0.396273813995814	0.443556484983951	0.318535888762186	AUTS2	1
GO:1901293	GO:1901293	nucleoside phosphate biosynthetic process	1/32	297/18870	0.398352211417207	0.44537676304875	0.319843104214545	ACSS2	1
GO:0001666	GO:0001666	response to hypoxia	1/32	298/18870	0.399388809125421	0.446029452367959	0.320311826867505	EP300	1
GO:0007249	GO:0007249	canonical NF-kappaB signal transduction	1/32	300/18870	0.401456816534307	0.447831216632268	0.321605746809387	SLC44A2	1
GO:0001933	GO:0001933	negative regulation of protein phosphorylation	1/32	304/18870	0.405572157432419	0.451910152795173	0.324534996183122	DGKQ	1
GO:0048608	GO:0048608	reproductive structure development	1/32	305/18870	0.406596701812585	0.4525398319609	0.324987194312289	BMP6	1
GO:0043087	GO:0043087	regulation of GTPase activity	1/32	307/18870	0.408640660958008	0.454301412013135	0.326252256342855	RANGAP1	1
GO:0006874	GO:0006874	intracellular calcium ion homeostasis	1/32	308/18870	0.409660081248335	0.454408986519831	0.326329509955999	CACNB2	1
GO:0018209	GO:0018209	peptidyl-serine modification	1/32	308/18870	0.409660081248335	0.454408986519831	0.326329509955999	DGKQ	1
GO:0061458	GO:0061458	reproductive system development	1/32	309/18870	0.410677799026595	0.455025457864112	0.326772223013287	BMP6	1
GO:0006402	GO:0006402	mRNA catabolic process	1/32	310/18870	0.411693817044544	0.455127283713665	0.326845348282749	FTO	1
GO:0071375	GO:0071375	cellular response to peptide hormone stimulus	1/32	310/18870	0.411693817044544	0.455127283713665	0.326845348282749	RANGAP1	1
GO:0007162	GO:0007162	negative regulation of cell adhesion	1/32	312/18870	0.413720764785046	0.456855328826536	0.328086327514221	BMP6	1
GO:0001822	GO:0001822	kidney development	1/32	314/18870	0.415740946398022	0.458572040539812	0.329319167772112	BMP6	1
GO:0036293	GO:0036293	response to decreased oxygen levels	1/32	315/18870	0.416748506740513	0.458656177809392	0.329379590155395	EP300	1
GO:1904062	GO:1904062	regulation of monoatomic cation transmembrane transport	1/32	315/18870	0.416748506740513	0.458656177809392	0.329379590155395	CACNB2	1
GO:0048872	GO:0048872	homeostasis of number of cells	1/32	316/18870	0.41775438374317	0.459250075878374	0.329806092428819	TMOD3	1
GO:0002429	GO:0002429	immune response-activating cell surface receptor signaling pathway	1/32	318/18870	0.419761098611911	0.460428376539791	0.330652277889115	EP300	1
GO:0009416	GO:0009416	response to light stimulus	1/32	318/18870	0.419761098611911	0.460428376539791	0.330652277889115	EP300	1
GO:0097193	GO:0097193	intrinsic apoptotic signaling pathway	1/32	319/18870	0.420761941908829	0.461012806207115	0.331071980519563	EP300	1
GO:0019058	GO:0019058	viral life cycle	1/32	321/18870	0.422758613773024	0.46217229141668	0.331904653841313	ILF3	1
GO:0030198	GO:0030198	extracellular matrix organization	1/32	321/18870	0.422758613773024	0.46217229141668	0.331904653841313	CHADL	1
GO:0043062	GO:0043062	extracellular structure organization	1/32	322/18870	0.423754447745705	0.462747373646917	0.332317643698347	CHADL	1
GO:0045229	GO:0045229	external encapsulating structure organization	1/32	323/18870	0.424748617342003	0.463319366646593	0.332728415053711	CHADL	1
GO:0072001	GO:0072001	renal system development	1/32	324/18870	0.425741125254067	0.463888283600947	0.333136977376261	BMP6	1
GO:0031647	GO:0031647	regulation of protein stability	1/32	325/18870	0.426731974169837	0.464454137632364	0.333543340089713	EP300	1
GO:0042326	GO:0042326	negative regulation of phosphorylation	1/32	327/18870	0.428708705743242	0.466090590681119	0.334718543347809	DGKQ	1
GO:0055074	GO:0055074	calcium ion homeostasis	1/32	331/18870	0.432642378738075	0.469848669302099	0.337417371916655	CACNB2	1
GO:0000377	GO:0000377	RNA splicing, via transesterification reactions with bulged adenosine as nucleophile	1/32	332/18870	0.433621689589813	0.469876088279391	0.337437062595512	SNRPD2	1
GO:0000398	GO:0000398	mRNA splicing, via spliceosome	1/32	332/18870	0.433621689589813	0.469876088279391	0.337437062595512	SNRPD2	1
GO:0045787	GO:0045787	positive regulation of cell cycle	1/32	334/18870	0.435575401012934	0.470440537278223	0.33784241629812	TMOD3	1
GO:0046394	GO:0046394	carboxylic acid biosynthetic process	1/32	334/18870	0.435575401012934	0.470440537278223	0.33784241629812	ACSS2	1
GO:0051607	GO:0051607	defense response to virus	1/32	334/18870	0.435575401012934	0.470440537278223	0.33784241629812	ILF3	1
GO:0140546	GO:0140546	defense response to symbiont	1/32	335/18870	0.436549806880844	0.470976516733441	0.338227324867617	ILF3	1
GO:0000375	GO:0000375	RNA splicing, via transesterification reactions	1/32	336/18870	0.437522583043769	0.471509567065769	0.338610129915251	SNRPD2	1
GO:0016053	GO:0016053	organic acid biosynthetic process	1/32	337/18870	0.438493732139625	0.472039700718613	0.338990840377139	ACSS2	1
GO:0006605	GO:0006605	protein targeting	1/32	339/18870	0.440431159661166	0.473607742648743	0.340116914838317	HSPA5	1
GO:0007265	GO:0007265	Ras protein signal transduction	1/32	341/18870	0.442362110466359	0.475165407643799	0.341235537201852	AUTS2	1
GO:0045089	GO:0045089	positive regulation of innate immune response	1/32	343/18870	0.444286605510349	0.476194022228176	0.341974227023601	EP300	1
GO:0070482	GO:0070482	response to oxygen levels	1/32	343/18870	0.444286605510349	0.476194022228176	0.341974227023601	EP300	1
GO:0002768	GO:0002768	immune response-regulating cell surface receptor signaling pathway	1/32	346/18870	0.447161289202205	0.4787542063741	0.343812799020459	EP300	1
GO:0032496	GO:0032496	response to lipopolysaccharide	1/32	348/18870	0.449069736092292	0.480275450652451	0.344905266191234	BMP6	1
GO:0009895	GO:0009895	negative regulation of catabolic process	1/32	349/18870	0.450021564644556	0.480771411252589	0.345261435598974	EP300	1
GO:0046942	GO:0046942	carboxylic acid transport	1/32	351/18870	0.451920444887234	0.48224269103672	0.346318021241438	SLC26A1	1
GO:0015849	GO:0015849	organic acid transport	1/32	352/18870	0.452867501734991	0.48224269103672	0.346318021241438	SLC26A1	1
GO:0070588	GO:0070588	calcium ion transmembrane transport	1/32	352/18870	0.452867501734991	0.48224269103672	0.346318021241438	CACNB2	1
GO:0030522	GO:0030522	intracellular receptor signaling pathway	1/32	353/18870	0.453812973165192	0.482649120959794	0.346609895041391	EP300	1
GO:0007517	GO:0007517	muscle organ development	1/32	354/18870	0.454756861746427	0.482649120959794	0.346609895041391	EP300	1
GO:0042886	GO:0042886	amide transport	1/32	354/18870	0.454756861746427	0.482649120959794	0.346609895041391	GIPR	1
GO:0010506	GO:0010506	regulation of autophagy	1/32	355/18870	0.455699170043257	0.482649120959794	0.346609895041391	EP300	1
GO:1901990	GO:1901990	regulation of mitotic cell cycle phase transition	1/32	355/18870	0.455699170043257	0.482649120959794	0.346609895041391	TMOD3	1
GO:1903311	GO:1903311	regulation of mRNA metabolic process	1/32	362/18870	0.46225129473914	0.489062862855051	0.35121586303884	FTO	1
GO:0009150	GO:0009150	purine ribonucleotide metabolic process	1/32	365/18870	0.465035898709206	0.49095429820854	0.35257417942414	ACSS2	1
GO:0050878	GO:0050878	regulation of body fluid levels	1/32	365/18870	0.465035898709206	0.49095429820854	0.35257417942414	DGKQ	1
GO:0016050	GO:0016050	vesicle organization	1/32	366/18870	0.465960991994335	0.491404258152484	0.352897313896307	TMEM175	1
GO:0006401	GO:0006401	RNA catabolic process	1/32	367/18870	0.466884535458244	0.491851622915904	0.35321858466416	FTO	1
GO:0002237	GO:0002237	response to molecule of bacterial origin	1/32	369/18870	0.468726982969731	0.493265040838873	0.354233617359041	BMP6	1
GO:0009100	GO:0009100	glycoprotein metabolic process	1/32	370/18870	0.469645892031132	0.493704593010314	0.354549277587958	IDUA	1
GO:1901653	GO:1901653	cellular response to peptide	1/32	374/18870	0.473306155292517	0.497021922135532	0.356931586080767	RANGAP1	1
GO:0044282	GO:0044282	small molecule catabolic process	1/32	375/18870	0.474217390317963	0.497448487181249	0.357237919728346	IDUA	1
GO:0045936	GO:0045936	negative regulation of phosphate metabolic process	1/32	376/18870	0.475127097996245	0.497872544176916	0.357542452243534	DGKQ	1
GO:0010563	GO:0010563	negative regulation of phosphorus metabolic process	1/32	377/18870	0.476035280804945	0.498294103711872	0.357845191230967	DGKQ	1
GO:0009259	GO:0009259	ribonucleotide metabolic process	1/32	385/18870	0.483246144000157	0.505305150573412	0.36288010813287	ACSS2	1
GO:0001654	GO:0001654	eye development	1/32	391/18870	0.488591107056514	0.510352322853304	0.366504687103842	BMP6	1
GO:0019693	GO:0019693	ribose phosphate metabolic process	1/32	393/18870	0.490360830197635	0.511658281509185	0.367442548943812	ACSS2	1
GO:0150063	GO:0150063	visual system development	1/32	395/18870	0.492124619973597	0.512955291718511	0.36837398454164	BMP6	1
GO:0031331	GO:0031331	positive regulation of cellular catabolic process	1/32	396/18870	0.493004295868636	0.513328997283939	0.368642357654082	FTO	1
GO:0010959	GO:0010959	regulation of metal ion transport	1/32	398/18870	0.494759221677764	0.514612284427241	0.369563938162016	CACNB2	1
GO:0006979	GO:0006979	response to oxidative stress	1/32	400/18870	0.496508262141592	0.515705129074526	0.370348754195118	GSS	1
GO:0006631	GO:0006631	fatty acid metabolic process	1/32	401/18870	0.497380581340914	0.515705129074526	0.370348754195118	ACSS2	1
GO:0048880	GO:0048880	sensory system development	1/32	401/18870	0.497380581340914	0.515705129074526	0.370348754195118	BMP6	1
GO:0051090	GO:0051090	regulation of DNA-binding transcription factor activity	1/32	406/18870	0.501720262187394	0.519657684810287	0.37318724466205	EP300	1
GO:0050678	GO:0050678	regulation of epithelial cell proliferation	1/32	407/18870	0.502583831923638	0.520005330299142	0.373436902977316	BMP6	1
GO:0001558	GO:0001558	regulation of cell growth	1/32	417/18870	0.511140168878837	0.52830332250331	0.379396027488351	DNM2	1
GO:0042060	GO:0042060	wound healing	1/32	423/18870	0.516205346167251	0.532979314438933	0.38275404681054	DGKQ	1
GO:0045088	GO:0045088	regulation of innate immune response	1/32	425/18870	0.517882412359455	0.534150969815773	0.383595460022655	EP300	1
GO:0009314	GO:0009314	response to radiation	1/32	428/18870	0.52038745650887	0.536173268474097	0.385047754650914	EP300	1
GO:0030098	GO:0030098	lymphocyte differentiation	1/32	429/18870	0.521219665672286	0.536204086260203	0.385069886152131	EP300	1
GO:0003002	GO:0003002	regionalization	1/32	430/18870	0.522050475861456	0.536204086260203	0.385069886152131	EP300	1
GO:0043434	GO:0043434	response to peptide hormone	1/32	430/18870	0.522050475861456	0.536204086260203	0.385069886152131	RANGAP1	1
GO:0060537	GO:0060537	muscle tissue development	1/32	433/18870	0.524534535325484	0.538194288849586	0.386499131292462	EP300	1
GO:0009615	GO:0009615	response to virus	1/32	436/18870	0.527006085742405	0.540167528050228	0.38791619433583	ILF3	1
GO:0031400	GO:0031400	negative regulation of protein modification process	1/32	437/18870	0.527827166639456	0.540446735072624	0.388116704214591	DGKQ	1
GO:0034470	GO:0034470	ncRNA processing	1/32	439/18870	0.529465188082276	0.541560966003159	0.388916878604459	ZC3H7B	1
GO:0015711	GO:0015711	organic anion transport	1/32	443/18870	0.532724732369231	0.544329731725822	0.390905241485175	SLC26A1	1
GO:0001503	GO:0001503	ossification	1/32	444/18870	0.533536194276443	0.54459393923554	0.391094979605966	BMP6	1
GO:0006816	GO:0006816	calcium ion transport	1/32	445/18870	0.534346290975843	0.544856207672056	0.391283325199702	CACNB2	1
GO:0006869	GO:0006869	lipid transport	1/32	453/18870	0.540778183099886	0.550844374719119	0.395583670650545	BMP6	1
GO:0034765	GO:0034765	regulation of monoatomic ion transmembrane transport	1/32	454/18870	0.541576092539035	0.551087242924534	0.395758084152057	CACNB2	1
GO:1901987	GO:1901987	regulation of cell cycle phase transition	1/32	456/18870	0.543167884197438	0.552136600551575	0.396511670393437	TMOD3	1
GO:0043161	GO:0043161	proteasome-mediated ubiquitin-dependent protein catabolic process	1/32	458/18870	0.544754320799503	0.553178356688155	0.397259797696436	HSPA5	1
GO:0006163	GO:0006163	purine nucleotide metabolic process	1/32	463/18870	0.548697098222358	0.556608281924844	0.399722966020299	ACSS2	1
GO:0051051	GO:0051051	negative regulation of transport	1/32	469/18870	0.553384776899717	0.560209666234554	0.402309266053562	RANGAP1	1
GO:0051656	GO:0051656	establishment of organelle localization	1/32	469/18870	0.553384776899717	0.560209666234554	0.402309266053562	DNM2	1
GO:0002757	GO:0002757	immune response-activating signaling pathway	1/32	473/18870	0.556483653874924	0.562768376865298	0.40414677985945	EP300	1
GO:0007389	GO:0007389	pattern specification process	1/32	475/18870	0.558025270966663	0.563748607079141	0.404850722903749	EP300	1
GO:0008380	GO:0008380	RNA splicing	1/32	478/18870	0.560327967620038	0.565494926337846	0.406104825539976	SNRPD2	1
GO:0031349	GO:0031349	positive regulation of defense response	1/32	480/18870	0.561856637390312	0.565878106165089	0.40638000250381	EP300	1
GO:0050673	GO:0050673	epithelial cell proliferation	1/32	480/18870	0.561856637390312	0.565878106165089	0.40638000250381	BMP6	1
GO:1903131	GO:1903131	mononuclear cell differentiation	1/32	481/18870	0.562619040196375	0.566067165059683	0.406515773358383	EP300	1
GO:0050808	GO:0050808	synapse organization	1/32	483/18870	0.564139992151353	0.567018257417431	0.407198791327292	CACNB2	1
GO:0007264	GO:0007264	small GTPase mediated signal transduction	1/32	491/18870	0.570172724330161	0.572497587630182	0.411133720424774	AUTS2	1
GO:0022407	GO:0022407	regulation of cell-cell adhesion	1/32	493/18870	0.571668221615427	0.572831330916781	0.411373395005158	BMP6	1
GO:0072521	GO:0072521	purine-containing compound metabolic process	1/32	493/18870	0.571668221615427	0.572831330916781	0.411373395005158	ACSS2	1
GO:0034655	GO:0034655	nucleobase-containing compound catabolic process	1/32	496/18870	0.573902020384893	0.574485254145446	0.412561144307497	FTO	1
GO:0002764	GO:0002764	immune response-regulating signaling pathway	1/32	500/18870	0.576862870260423	0.576862870260423	0.414268606802035	EP300	1

## Sheet: Supplementary Table 09
Table S09: KEGG Analysis of Genes Shared between neck pain and OSA
	category	subcategory	ID	Description	GeneRatio	BgRatio	pvalue	p.adjust	qvalue	geneID	Count
hsa00010	Metabolism	Carbohydrate metabolism	hsa00010	Glycolysis / Gluconeogenesis	45679	67/9440	0.145189953287347	0.421961885828763	0.417413152753881	55902	1
hsa00270	Metabolism	Amino acid metabolism	hsa00270	Cysteine and methionine metabolism	45679	52/9440	0.11454814645909	0.421961885828763	0.417413152753881	2937	1
hsa00480	Metabolism	Metabolism of other amino acids	hsa00480	Glutathione metabolism	45679	59/9440	0.128975890811089	0.421961885828763	0.417413152753881	2937	1
hsa00531	Metabolism	Glycan biosynthesis and metabolism	hsa00531	Glycosaminoglycan degradation	45679	19/9440	0.0434035972600092	0.421961885828763	0.417413152753881	3425	1
hsa00561	Metabolism	Lipid metabolism	hsa00561	Glycerolipid metabolism	45679	65/9440	0.141163663062753	0.421961885828763	0.417413152753881	1609	1
hsa00564	Metabolism	Lipid metabolism	hsa00564	Glycerophospholipid metabolism	45679	103/9440	0.21465477820411	0.421961885828763	0.417413152753881	1609	1
hsa00620	Metabolism	Carbohydrate metabolism	hsa00620	Pyruvate metabolism	45679	47/9440	0.104103253352017	0.421961885828763	0.417413152753881	55902	1
hsa00630	Metabolism	Carbohydrate metabolism	hsa00630	Glyoxylate and dicarboxylate metabolism	45679	32/9440	0.072058249737162	0.421961885828763	0.417413152753881	55902	1
hsa00640	Metabolism	Carbohydrate metabolism	hsa00640	Propanoate metabolism	45679	32/9440	0.072058249737162	0.421961885828763	0.417413152753881	55902	1
hsa01200	Metabolism	Global and overview maps	hsa01200	Carbon metabolism	45679	117/9440	0.24018545083038	0.421961885828763	0.417413152753881	55902	1
hsa01240	Metabolism	Global and overview maps	hsa01240	Biosynthesis of cofactors	45679	154/9440	0.303901728093541	0.442910995331156	0.438136431652888	2937	1
hsa03013	Genetic Information Processing	Translation	hsa03013	Nucleocytoplasmic transport	45679	108/9440	0.223865463793104	0.421961885828763	0.417413152753881	5905	1
hsa03040	Genetic Information Processing	Transcription	hsa03040	Spliceosome	45679	237/9440	0.428798540699987	0.494309428862484	0.488980792026301	6633	1
hsa03060	Genetic Information Processing	Folding, sorting and degradation	hsa03060	Protein export	45679	31/9440	0.0698834634896089	0.421961885828763	0.417413152753881	3309	1
hsa03082	Genetic Information Processing	Chromosome	hsa03082	ATP-dependent chromatin remodeling	45679	117/9440	0.24018545083038	0.421961885828763	0.417413152753881	11176	1
hsa03083	Genetic Information Processing	Chromosome	hsa03083	Polycomb repressive complex	45738	83/9440	0.00089465083484042	0.0742560192917549	0.0734555422290029	26053/2033/83746	3
hsa03250	Genetic Information Processing	Information processing in viruses	hsa03250	Viral life cycle - HIV-1	45679	64/9440	0.13914373582172	0.421961885828763	0.417413152753881	2033	1
hsa04010	Environmental Information Processing	Signal transduction	hsa04010	MAPK signaling pathway	45679	300/9440	0.508998211631296	0.541626302120481	0.535787591190838	783	1
hsa04024	Environmental Information Processing	Signal transduction	hsa04024	cAMP signaling pathway	45710	226/9440	0.096402645118141	0.421961885828763	0.417413152753881	2033/2696	2
hsa04060	Environmental Information Processing	Signaling molecules and interaction	hsa04060	Cytokine-cytokine receptor interaction	45679	298/9440	0.506626355966734	0.541626302120481	0.535787591190838	654	1
hsa04066	Environmental Information Processing	Signal transduction	hsa04066	HIF-1 signaling pathway	45679	110/9440	0.227520788624489	0.421961885828763	0.417413152753881	2033	1
hsa04068	Environmental Information Processing	Signal transduction	hsa04068	FoxO signaling pathway	45679	133/9440	0.268393204239242	0.436796783369747	0.432088130663795	2033	1
hsa04070	Environmental Information Processing	Signal transduction	hsa04070	Phosphatidylinositol signaling system	45679	98/9440	0.205339810568523	0.421961885828763	0.417413152753881	1609	1
hsa04072	Environmental Information Processing	Signal transduction	hsa04072	Phospholipase D signaling pathway	45710	149/9440	0.0465139776116013	0.421961885828763	0.417413152753881	1609/1785	2
hsa04080	Environmental Information Processing	Signaling molecules and interaction	hsa04080	Neuroactive ligand-receptor interaction	45710	370/9440	0.212605708839193	0.421961885828763	0.417413152753881	2696/2560	2
hsa04081	NA	NA	hsa04081	Hormone signaling	45679	219/9440	0.403679388343658	0.485106872359333	0.479877438732124	2696	1
hsa04082	NA	NA	hsa04082	Neuroactive ligand signaling	45679	199/9440	0.374533195819227	0.471003867469634	0.46592646369856	2560	1
hsa04110	Cellular Processes	Cell growth and death	hsa04110	Cell cycle	45679	158/9440	0.310476047375328	0.442910995331156	0.438136431652888	2033	1
hsa04141	Genetic Information Processing	Folding, sorting and degradation	hsa04141	Protein processing in endoplasmic reticulum	45679	171/9440	0.331435715042073	0.442910995331156	0.438136431652888	3309	1
hsa04142	Cellular Processes	Transport and catabolism	hsa04142	Lysosome	45679	133/9440	0.268393204239242	0.436796783369747	0.432088130663795	3425	1
hsa04144	Cellular Processes	Transport and catabolism	hsa04144	Endocytosis	45679	252/9440	0.448956475988287	0.503559290635511	0.498130940641343	1785	1
hsa04216	Cellular Processes	Cell growth and death	hsa04216	Ferroptosis	45679	42/9440	0.0935408144517681	0.421961885828763	0.417413152753881	2937	1
hsa04260	Organismal Systems	Circulatory system	hsa04260	Cardiac muscle contraction	45679	87/9440	0.184474253681262	0.421961885828763	0.417413152753881	783	1
hsa04261	Organismal Systems	Circulatory system	hsa04261	Adrenergic signaling in cardiomyocytes	45679	154/9440	0.303901728093541	0.442910995331156	0.438136431652888	783	1
hsa04310	Environmental Information Processing	Signal transduction	hsa04310	Wnt signaling pathway	45679	174/9440	0.336185454287504	0.442910995331156	0.438136431652888	2033	1
hsa04330	Environmental Information Processing	Signal transduction	hsa04330	Notch signaling pathway	45679	62/9440	0.13509026871617	0.421961885828763	0.417413152753881	2033	1
hsa04350	Environmental Information Processing	Signal transduction	hsa04350	TGF-beta signaling pathway	45710	110/9440	0.0267044075385794	0.421961885828763	0.417413152753881	2033/654	2
hsa04390	Environmental Information Processing	Signal transduction	hsa04390	Hippo signaling pathway	45679	157/9440	0.308838046408074	0.442910995331156	0.438136431652888	654	1
hsa04514	Environmental Information Processing	Signaling molecules and interaction	hsa04514	Cell adhesion molecules	45679	160/9440	0.313740939642173	0.442910995331156	0.438136431652888	9369	1
hsa04520	Cellular Processes	Cellular community - eukaryotes	hsa04520	Adherens junction	45679	93/9440	0.195919437047634	0.421961885828763	0.417413152753881	2033	1
hsa04612	Organismal Systems	Immune system	hsa04612	Antigen processing and presentation	45679	82/9440	0.174817974464922	0.421961885828763	0.417413152753881	3309	1
hsa04630	Environmental Information Processing	Signal transduction	hsa04630	JAK-STAT signaling pathway	45679	168/9440	0.326653545700371	0.442910995331156	0.438136431652888	2033	1
hsa04666	Organismal Systems	Immune system	hsa04666	Fc gamma R-mediated phagocytosis	45679	99/9440	0.207211200438732	0.421961885828763	0.417413152753881	1785	1
hsa04720	Organismal Systems	Nervous system	hsa04720	Long-term potentiation	45679	67/9440	0.145189953287347	0.421961885828763	0.417413152753881	2033	1
hsa04721	Organismal Systems	Nervous system	hsa04721	Synaptic vesicle cycle	45679	79/9440	0.168971923334112	0.421961885828763	0.417413152753881	1785	1
hsa04723	Organismal Systems	Nervous system	hsa04723	Retrograde endocannabinoid signaling	45679	149/9440	0.295599663090496	0.442910995331156	0.438136431652888	2560	1
hsa04726	Organismal Systems	Nervous system	hsa04726	Serotonergic synapse	45679	115/9440	0.236587345732834	0.421961885828763	0.417413152753881	2560	1
hsa04727	Organismal Systems	Nervous system	hsa04727	GABAergic synapse	45679	89/9440	0.188306483435296	0.421961885828763	0.417413152753881	2560	1
hsa04820	NA	NA	hsa04820	Cytoskeleton in muscle cells	45710	233/9440	0.101496438559559	0.421961885828763	0.417413152753881	29767/29766	2
hsa04913	Organismal Systems	Endocrine system	hsa04913	Ovarian steroidogenesis	45679	52/9440	0.11454814645909	0.421961885828763	0.417413152753881	654	1
hsa04916	Organismal Systems	Endocrine system	hsa04916	Melanogenesis	45679	101/9440	0.21094136767413	0.421961885828763	0.417413152753881	2033	1
hsa04918	Organismal Systems	Endocrine system	hsa04918	Thyroid hormone synthesis	45679	75/9440	0.161115666838753	0.421961885828763	0.417413152753881	3309	1
hsa04919	Organismal Systems	Endocrine system	hsa04919	Thyroid hormone signaling pathway	45679	122/9440	0.249110028983246	0.421961885828763	0.417413152753881	2033	1
hsa04921	Organismal Systems	Endocrine system	hsa04921	Oxytocin signaling pathway	45679	155/9440	0.305550894794159	0.442910995331156	0.438136431652888	783	1
hsa04922	Organismal Systems	Endocrine system	hsa04922	Glucagon signaling pathway	45679	107/9440	0.222031615678341	0.421961885828763	0.417413152753881	2033	1
hsa04935	Organismal Systems	Endocrine system	hsa04935	Growth hormone synthesis, secretion and action	45679	122/9440	0.249110028983246	0.421961885828763	0.417413152753881	2033	1
hsa04961	Organismal Systems	Excretory system	hsa04961	Endocrine and other factor-regulated calcium reabsorption	45679	53/9440	0.116623129498917	0.421961885828763	0.417413152753881	1785	1
hsa04971	Organismal Systems	Digestive system	hsa04971	Gastric acid secretion	45679	76/9440	0.163086350803466	0.421961885828763	0.417413152753881	389015	1
hsa05012	Human Diseases	Neurodegenerative disease	hsa05012	Parkinson disease	45679	271/9440	0.473516290175527	0.524024694460917	0.518375728192156	3309	1
hsa05014	Human Diseases	Neurodegenerative disease	hsa05014	Amyotrophic lateral sclerosis	45679	371/9440	0.586488546516143	0.593640845863901	0.587241420131697	3309	1
hsa05016	Human Diseases	Neurodegenerative disease	hsa05016	Huntington disease	45679	311/9440	0.521850091503926	0.548272880947162	0.542362520150649	2033	1
hsa05020	Human Diseases	Neurodegenerative disease	hsa05020	Prion disease	45679	278/9440	0.482298421675548	0.526720644724612	0.521042616214581	3309	1
hsa05022	Human Diseases	Neurodegenerative disease	hsa05022	Pathways of neurodegeneration - multiple diseases	45679	483/9440	0.685501345736386	0.685501345736386	0.678111667310566	3309	1
hsa05032	Human Diseases	Substance dependence	hsa05032	Morphine addiction	45679	91/9440	0.192121520064512	0.421961885828763	0.417413152753881	2560	1
hsa05033	Human Diseases	Substance dependence	hsa05033	Nicotine addiction	45679	41/9440	0.0914141105931713	0.421961885828763	0.417413152753881	2560	1
hsa05100	Human Diseases	Infectious disease: bacterial	hsa05100	Bacterial invasion of epithelial cells	45679	78/9440	0.167014469620338	0.421961885828763	0.417413152753881	1785	1
hsa05132	Human Diseases	Infectious disease: bacterial	hsa05132	Salmonella infection	45679	251/9440	0.447634019619982	0.503559290635511	0.498130940641343	1785	1
hsa05152	Human Diseases	Infectious disease: bacterial	hsa05152	Tuberculosis	45679	182/9440	0.348694467774363	0.452213137894877	0.447338297473689	2033	1
hsa05161	Human Diseases	Infectious disease: viral	hsa05161	Hepatitis B	45679	163/9440	0.318610623417604	0.442910995331156	0.438136431652888	2033	1
hsa05164	Human Diseases	Infectious disease: viral	hsa05164	Influenza A	45679	173/9440	0.334605798256604	0.442910995331156	0.438136431652888	2033	1
hsa05165	Human Diseases	Infectious disease: viral	hsa05165	Human papillomavirus infection	45679	333/9440	0.54659705482969	0.560093278405732	0.554055494174345	2033	1
hsa05166	Human Diseases	Infectious disease: viral	hsa05166	Human T-cell leukemia virus 1 infection	45679	224/9440	0.410760736113079	0.485106872359333	0.479877438732124	2033	1
hsa05167	Human Diseases	Infectious disease: viral	hsa05167	Kaposi sarcoma-associated herpesvirus infection	45679	196/9440	0.370045680593943	0.471003867469634	0.46592646369856	2033	1
hsa05203	Human Diseases	Cancer: overview	hsa05203	Viral carcinogenesis	45679	205/9440	0.38341685234261	0.47497908573786	0.469858829265099	2033	1
hsa05206	Human Diseases	Cancer: overview	hsa05206	MicroRNAs in cancer	45679	320/9440	0.532125794475428	0.552080511768257	0.54612910485636	2033	1
hsa05208	Human Diseases	Cancer: overview	hsa05208	Chemical carcinogenesis - reactive oxygen species	45679	227/9440	0.414970939006177	0.485106872359333	0.479877438732124	10861	1
hsa05211	Human Diseases	Cancer: specific types	hsa05211	Renal cell carcinoma	45679	70/9440	0.151195622491085	0.421961885828763	0.417413152753881	2033	1
hsa05215	Human Diseases	Cancer: specific types	hsa05215	Prostate cancer	45679	106/9440	0.220193631952495	0.421961885828763	0.417413152753881	2033	1
hsa05231	Human Diseases	Cancer: overview	hsa05231	Choline metabolism in cancer	45710	99/9440	0.0219436032880401	0.421961885828763	0.417413152753881	1609/57153	2
hsa05410	Human Diseases	Cardiovascular disease	hsa05410	Hypertrophic cardiomyopathy	45679	99/9440	0.207211200438732	0.421961885828763	0.417413152753881	783	1
hsa05412	Human Diseases	Cardiovascular disease	hsa05412	Arrhythmogenic right ventricular cardiomyopathy	45679	86/9440	0.182551668338462	0.421961885828763	0.417413152753881	783	1
hsa05414	Human Diseases	Cardiovascular disease	hsa05414	Dilated cardiomyopathy	45679	105/9440	0.218351503734193	0.421961885828763	0.417413152753881	783	1
hsa05417	Human Diseases	Cardiovascular disease	hsa05417	Lipid and atherosclerosis	45679	216/9440	0.399391665226263	0.485106872359333	0.479877438732124	3309	1
